# Supplementary material for: Discovery of Novel Pleuromutilin Derivatives as Potent Antibacterial Agents for the Treatment of MRSA Infection
Source: MDPI journal article supplement (doi:10.3390/molecules27030931), 2022-01-29
Supplement: s1 [file s1]

---

# **Discovery of Novel pleuromutilin derivatives as potent antibacterial agents for the treatment of MRSA infection**

Han-Qing Fang<sup>1</sup>, Jie Zeng<sup>1</sup>, Shou-Kai Wang<sup>1</sup>, Xiao Wang<sup>1</sup>, Fang Chen<sup>1</sup>, Bo Li<sup>1</sup>, Jie Liu<sup>1</sup>, Zhen Jin<sup>1,2</sup>, Ya-Hong Liu<sup>1,2</sup>, You-Zhi Tang<sup>1,2\*</sup>

*<sup>1</sup>Guangdong Provincial Key Laboratory of Veterinary Pharmaceuticals Development and Safety Evaluation, College of Veterinary Medicine, South China Agricultural University, Guangzhou 510642, China*

*<sup>2</sup>Guangdong Laboratory for Lingnan Modern Agriculture, Guangzhou, 510642, China*

Correspondence should be addressed:

College of Veterinary Medicine, South China Agricultural University, No. 483

Wushan Road, Tianhe District, Guangzhou 510642, China

You-Zhi Tang,

Fax: +86 20 85280665; Email: youzhitang@scau.edu.cn

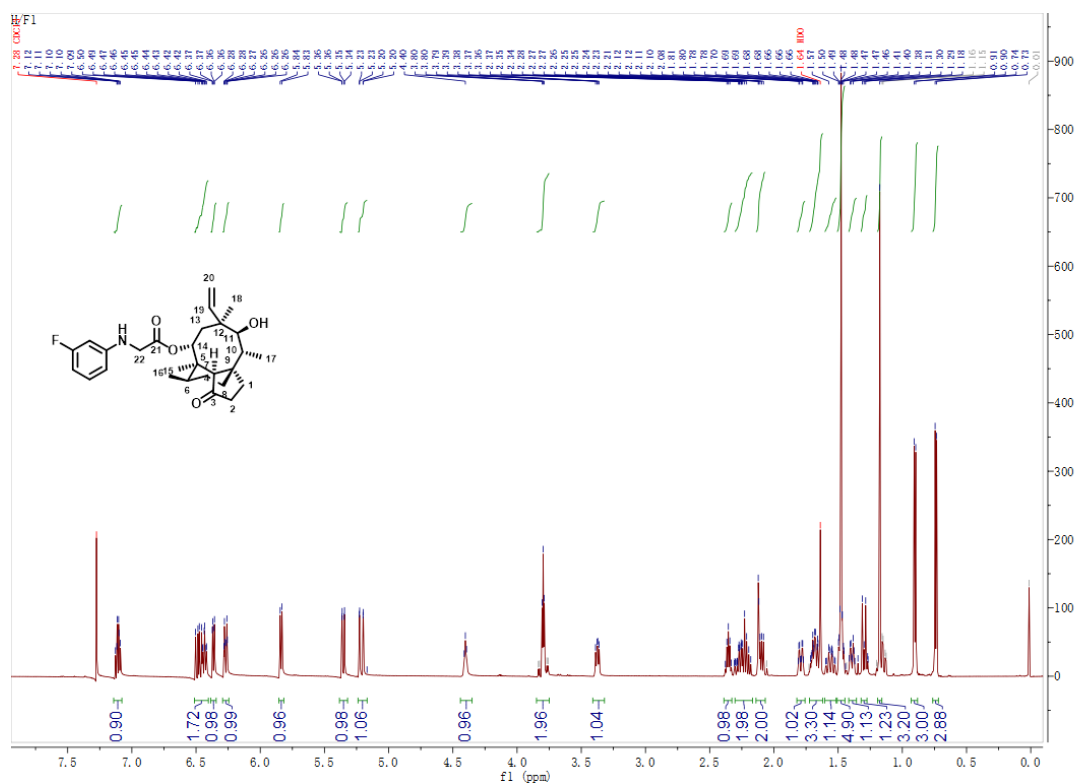

**Figure SI 1-1.** <sup>1</sup>H-NMR spectrum (CDCl<sub>3</sub>, 400MHz) of compound **8**.

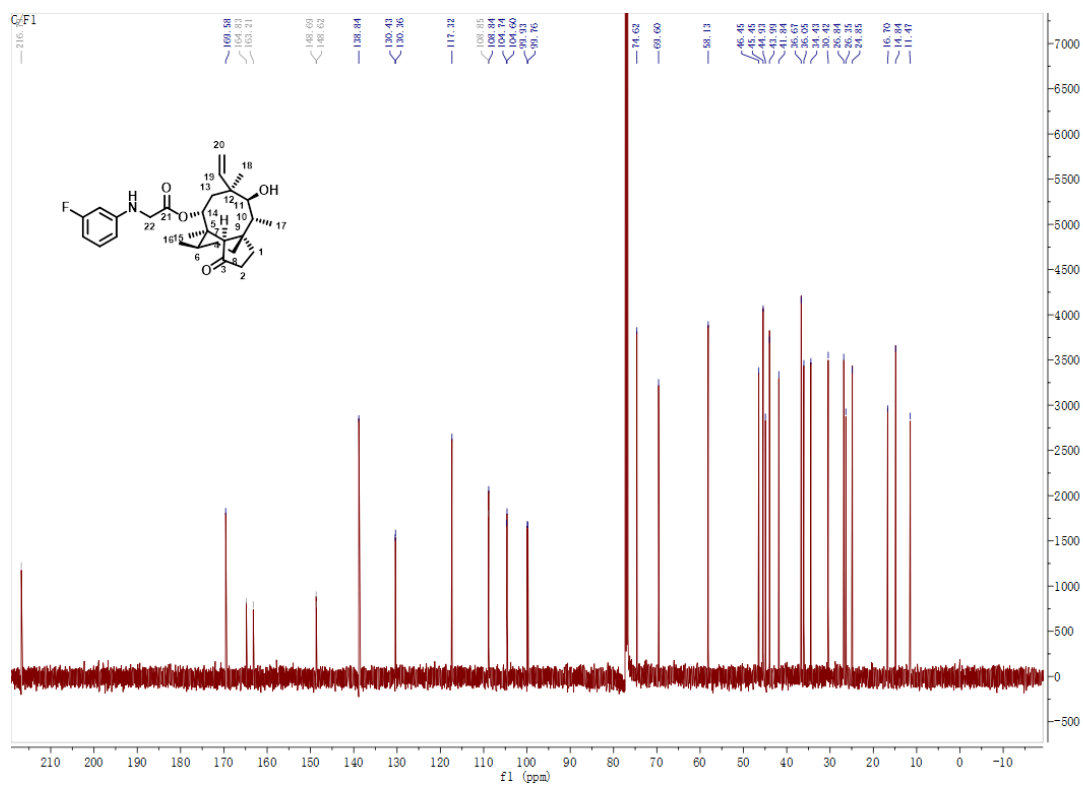

**Figure SI 1-2.** <sup>13</sup>C-NMR spectrum (CDCl<sub>3</sub>, 101MHz) of compound **8**.

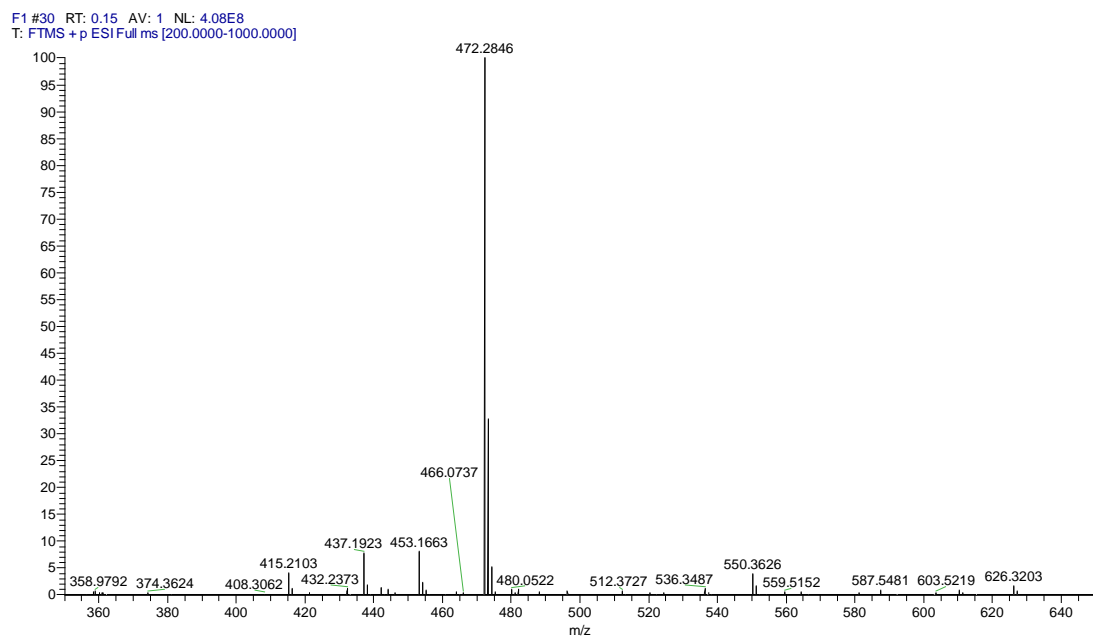

**Figure SI 1-3. HR Mass spectrum (ESI) of compound 8.**

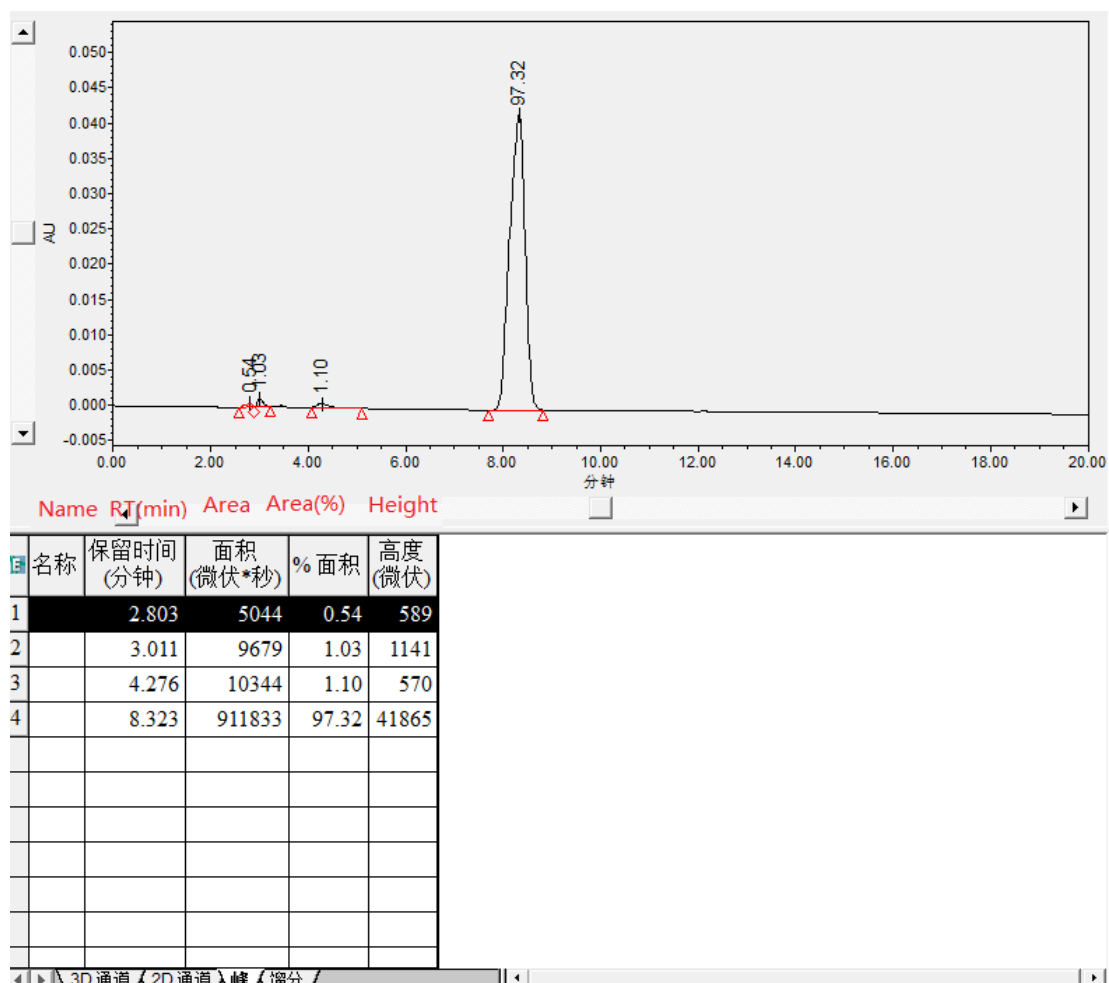

**Figure SI 1-4. HPLC of compound 8.**

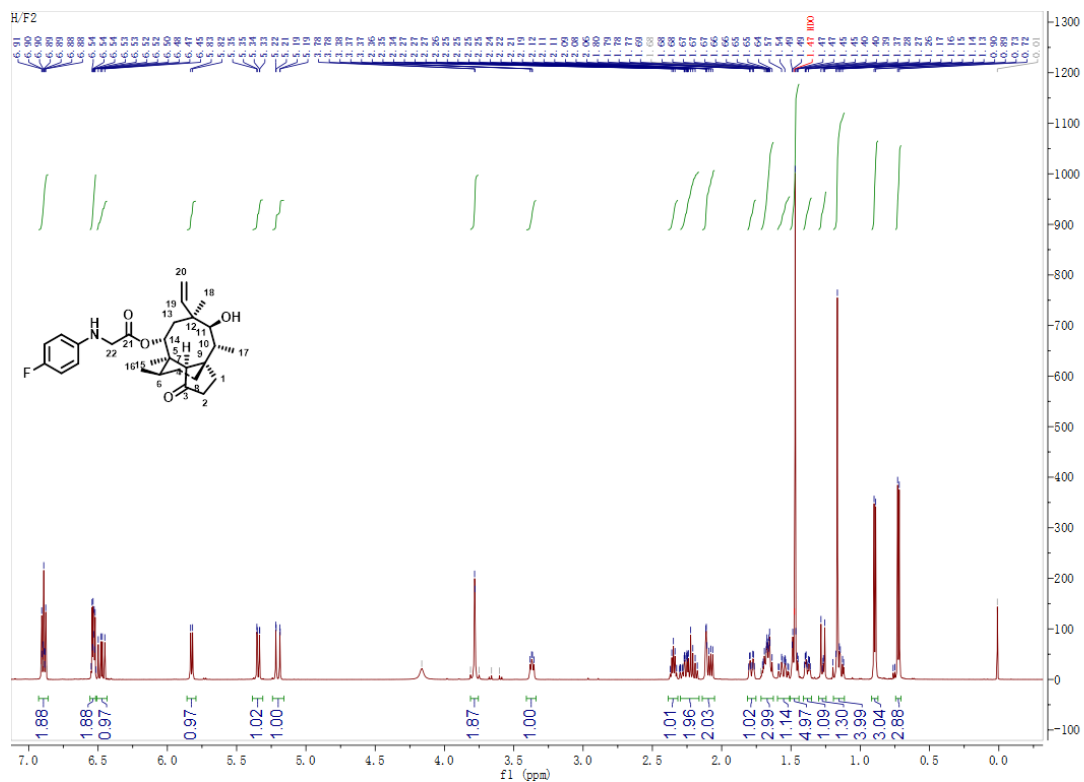

**Figure SI 2-1.**  $^1\text{H}$ -NMR spectrum ( $\text{CDCl}_3$ , 400MHz) of compound **9**.

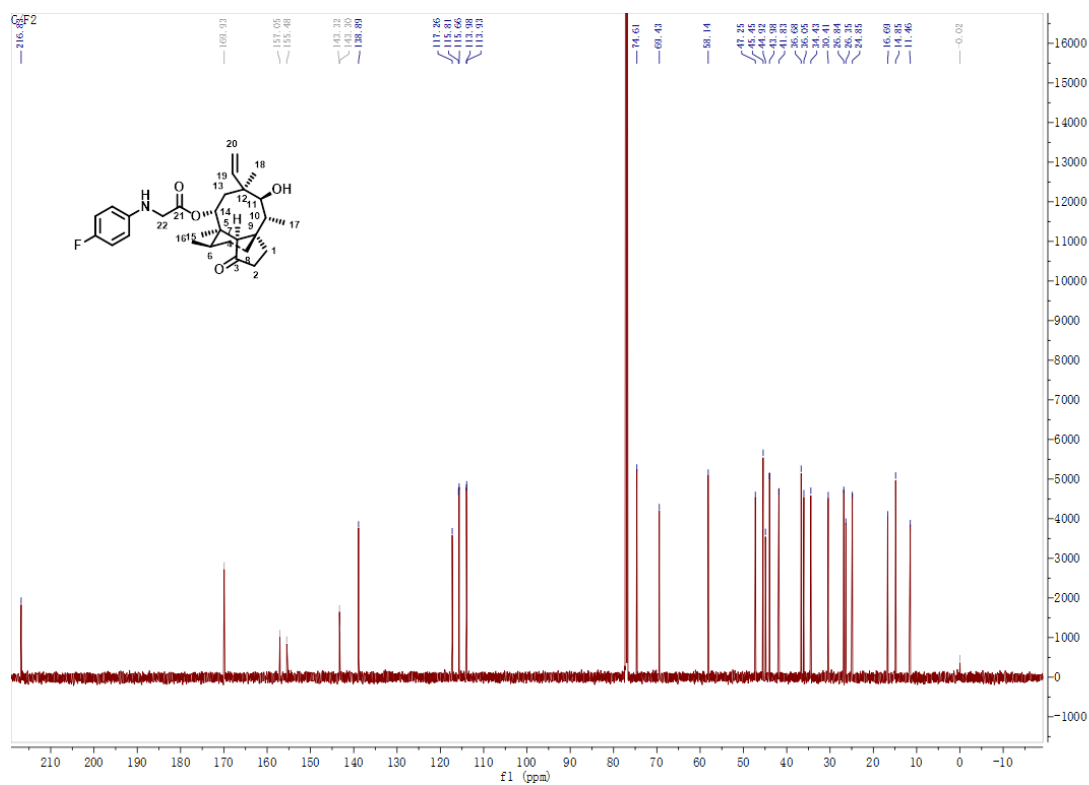

**Figure SI 2-2.**  $^{13}\text{C}$ -NMR spectrum ( $\text{CDCl}_3$ , 101MHz) of compound **9**.

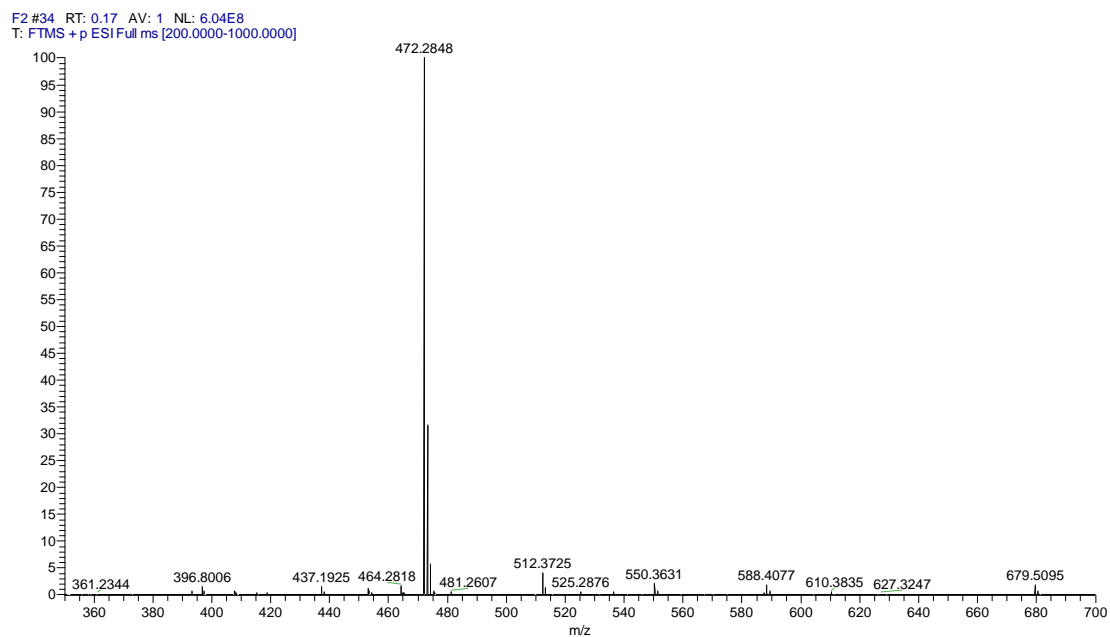

**Figure SI 2-3. HR Mass spectrum (ESI) of compound 9.**

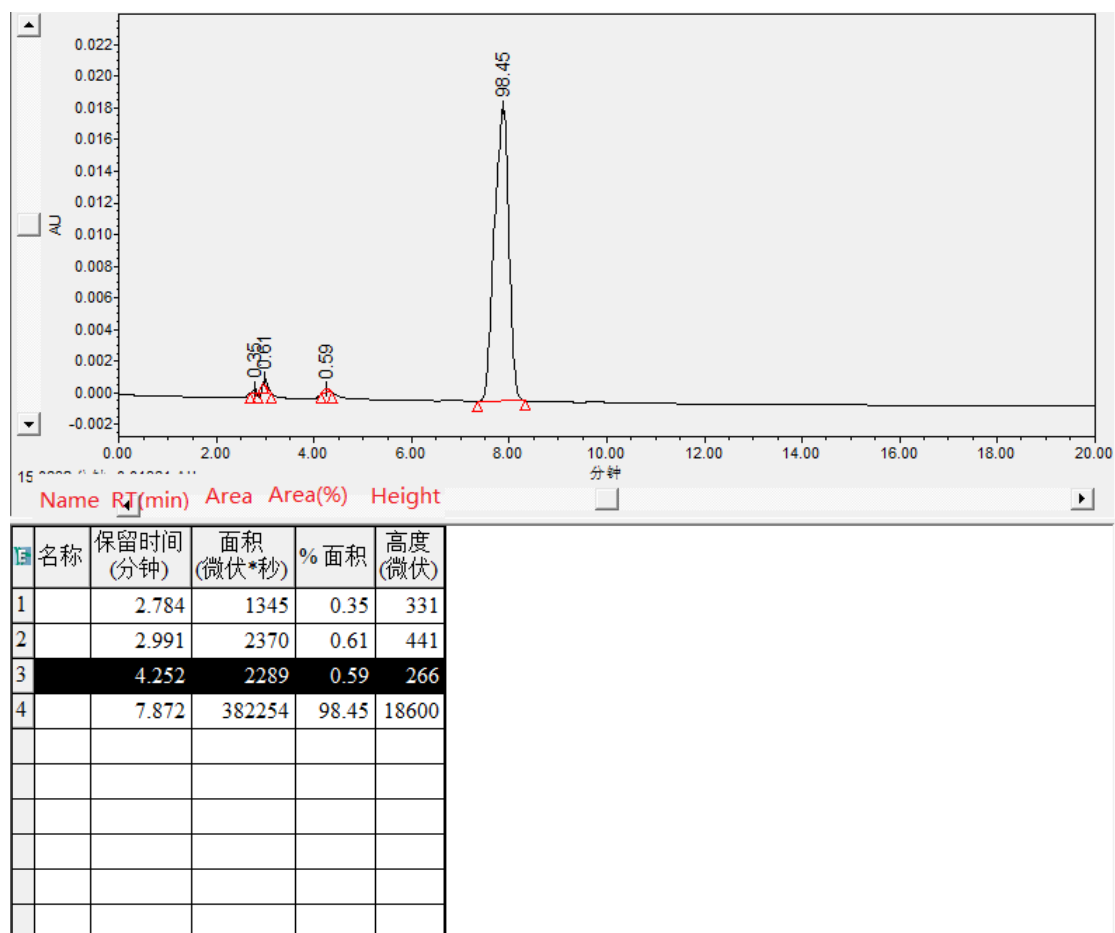

**Figure SI 2-4. HPLC of compound 9.**

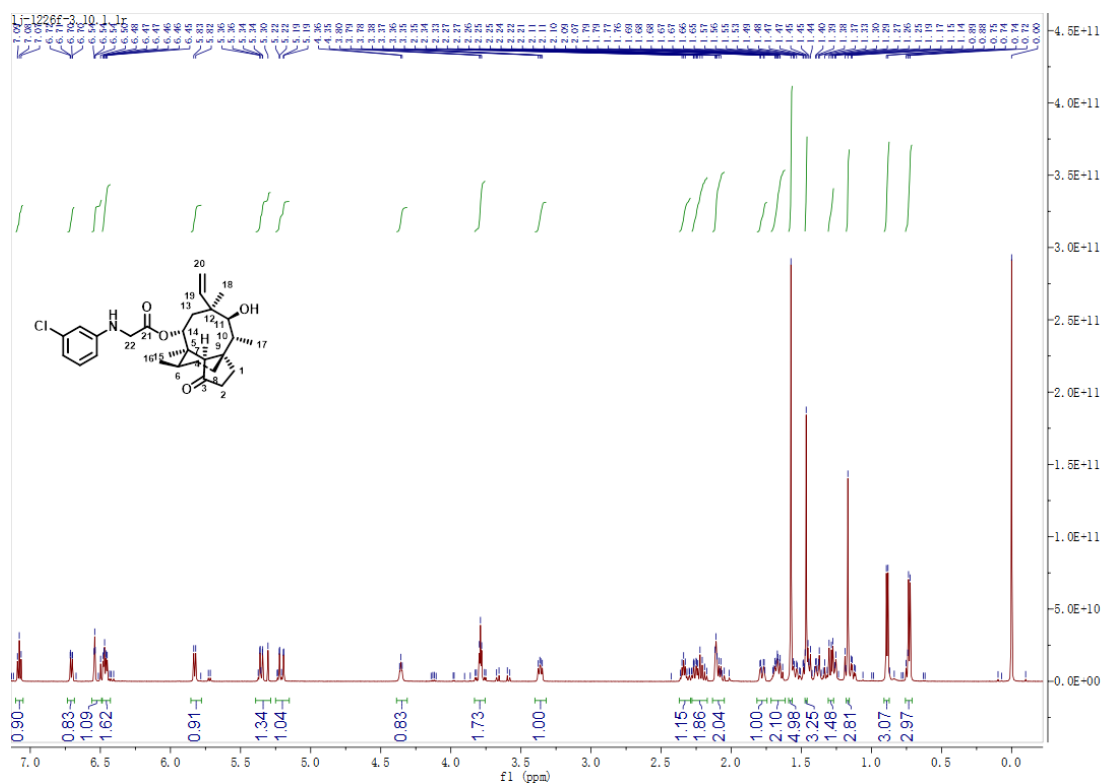

**Figure SI 3-1.**  $^1\text{H}$ -NMR spectrum (CDCl<sub>3</sub>, 400MHz) of compound 10.

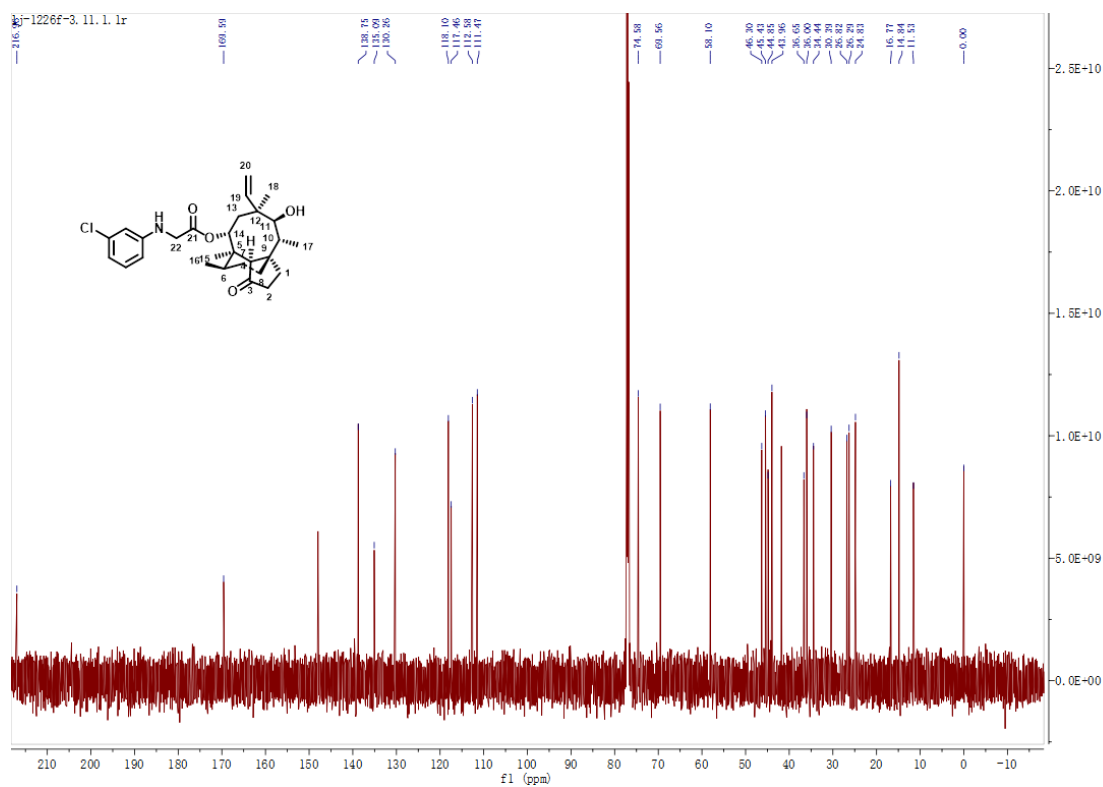

**Figure SI 3-2.**  $^{13}\text{C}$ -NMR spectrum (CDCl<sub>3</sub>, 101MHz) of compound 10.

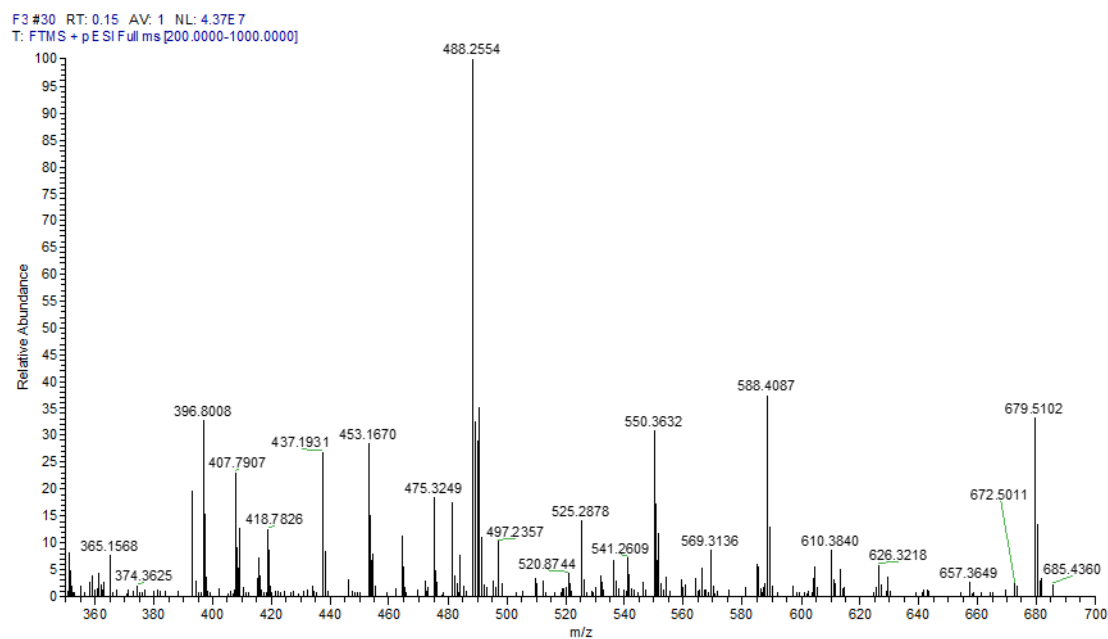

Figure SI 3-3. HR Mass spectrum (ESI) of compound 10.

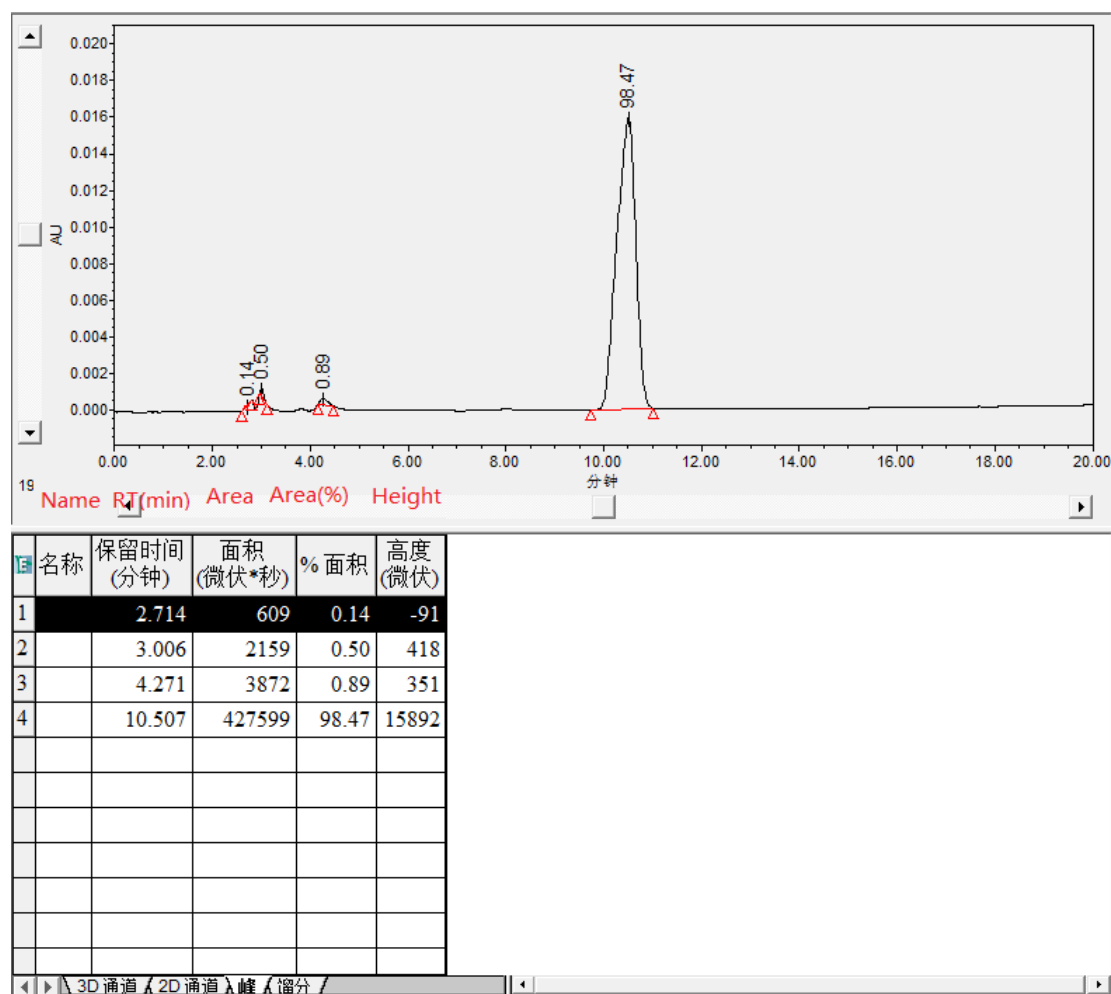

Figure SI 3-4. HPLC of compound 10.

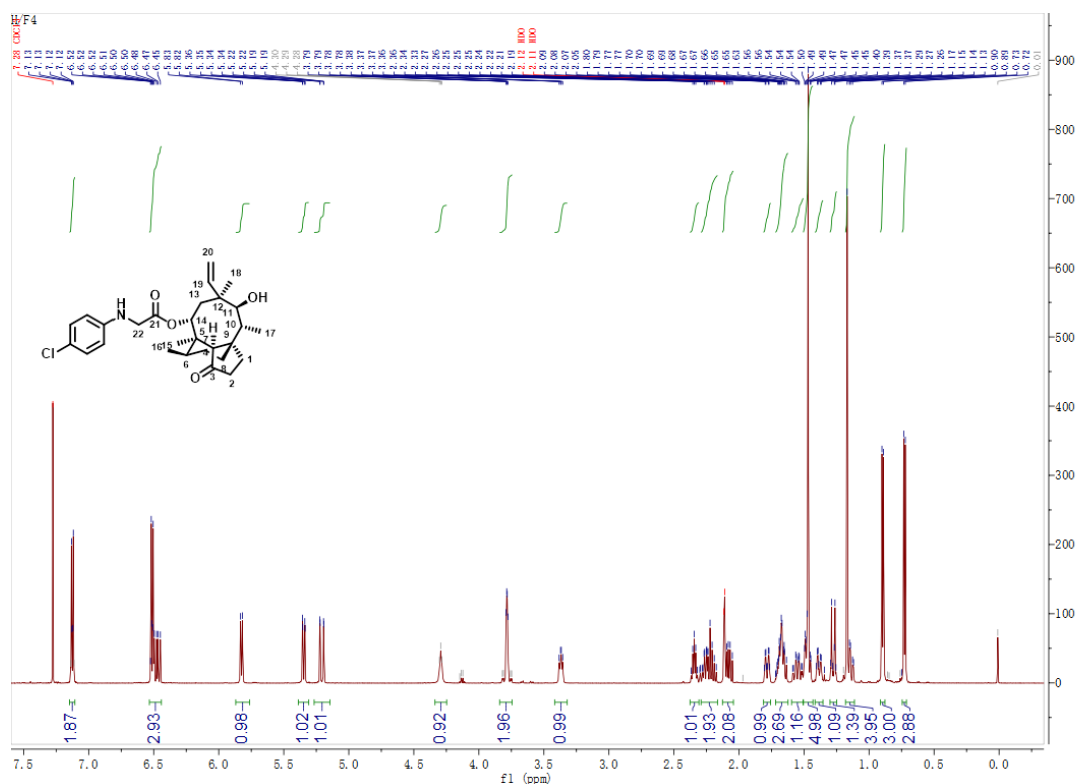

**Figure SI 4-1.** <sup>1</sup>H-NMR spectrum (CDCl<sub>3</sub>, 400MHz) of compound 11.

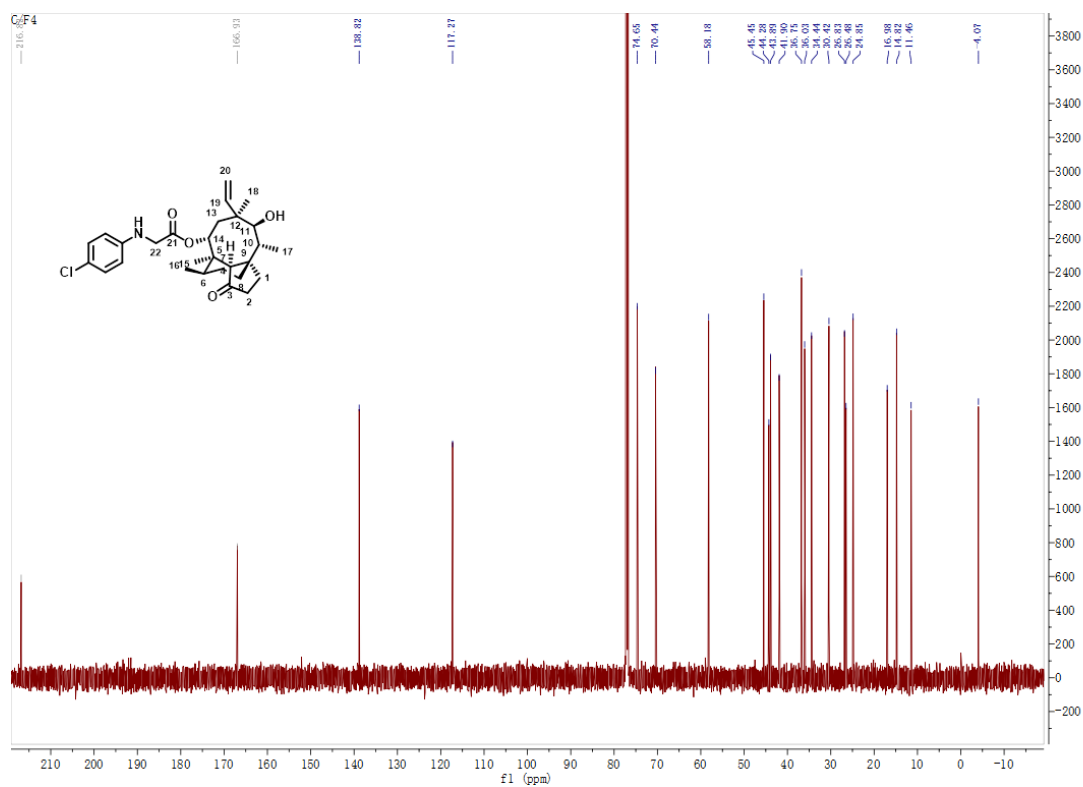

**Figure SI 4-2.** <sup>13</sup>C-NMR spectrum (CDCl<sub>3</sub>, 101MHz) of compound 11.



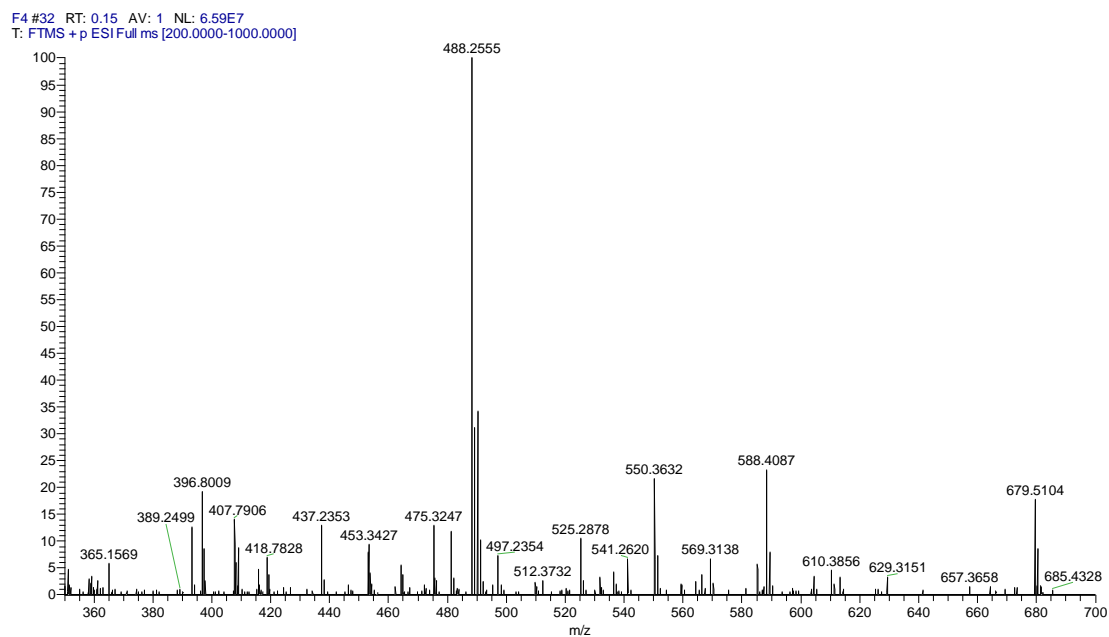

Figure SI 4-3. HR Mass spectrum (ESI) of compound 11.

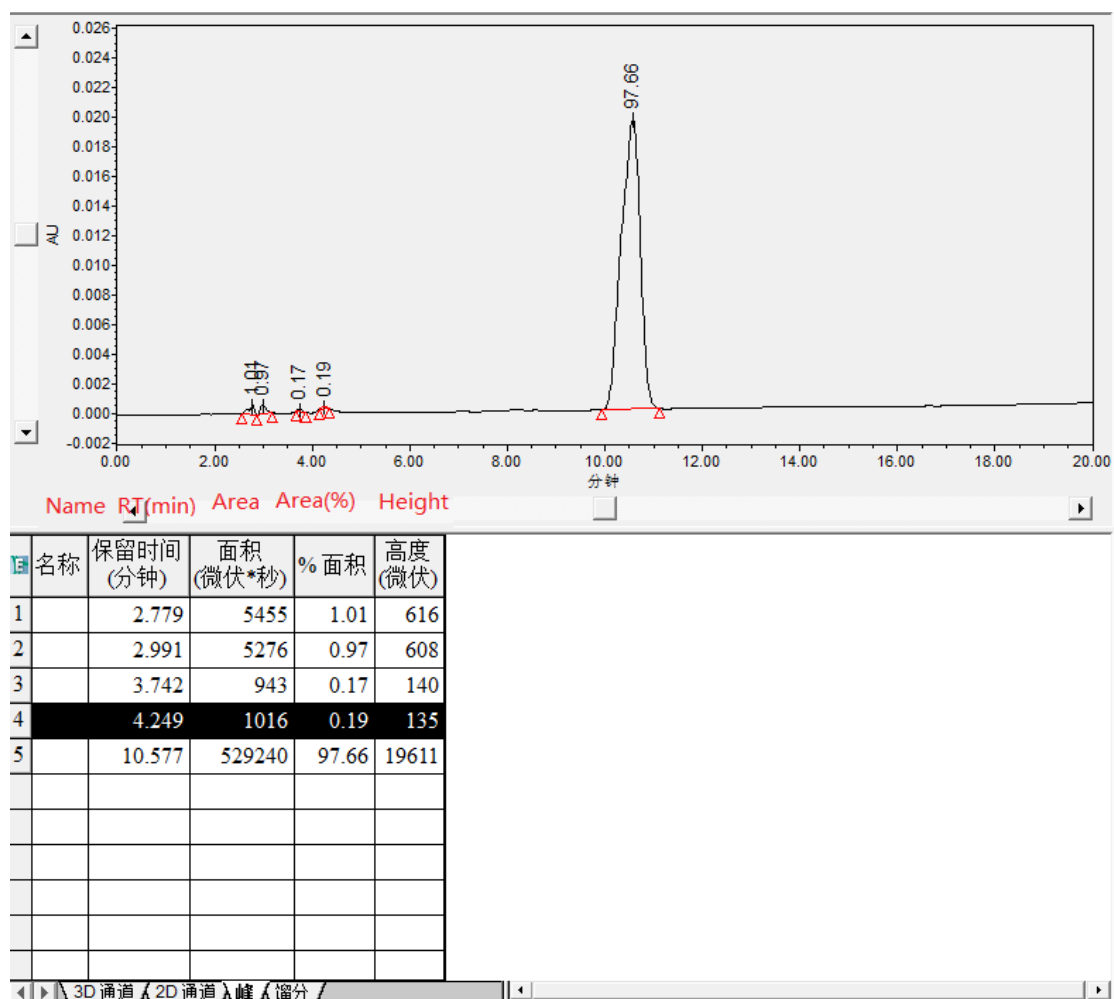

Figure SI 4-4. HPLC of compound 11.

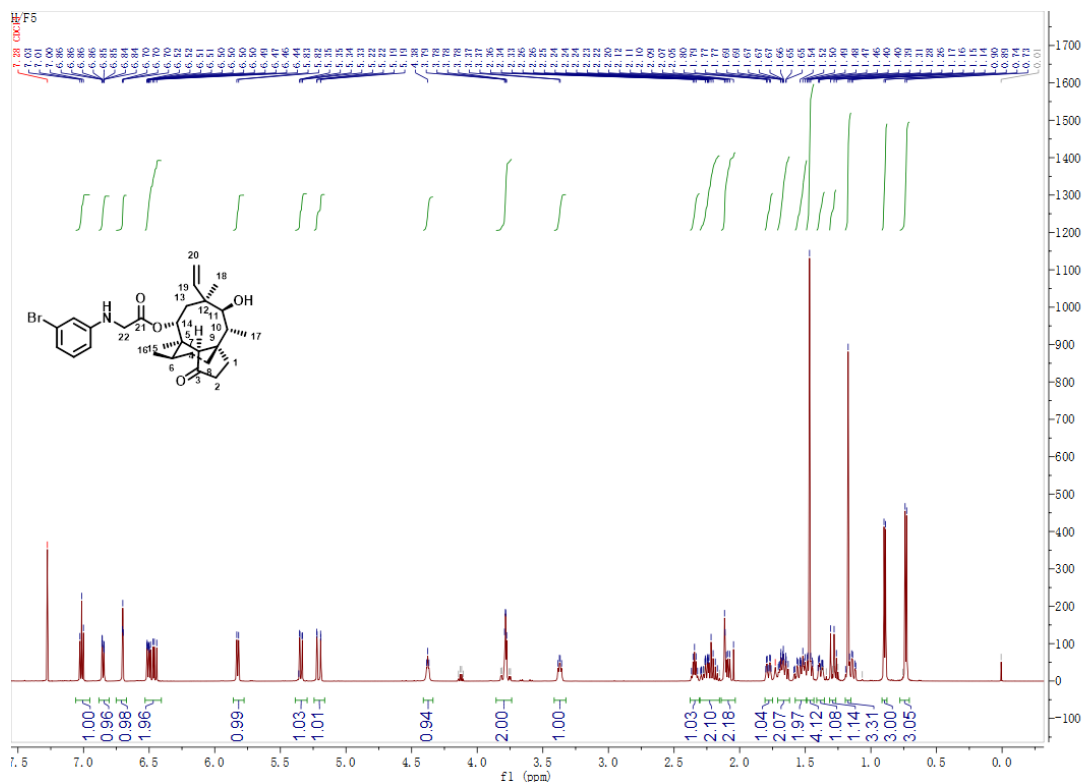

Figure SI 5-1. <sup>1</sup>H-NMR spectrum (CDCl<sub>3</sub>, 400MHz) of compound 12.

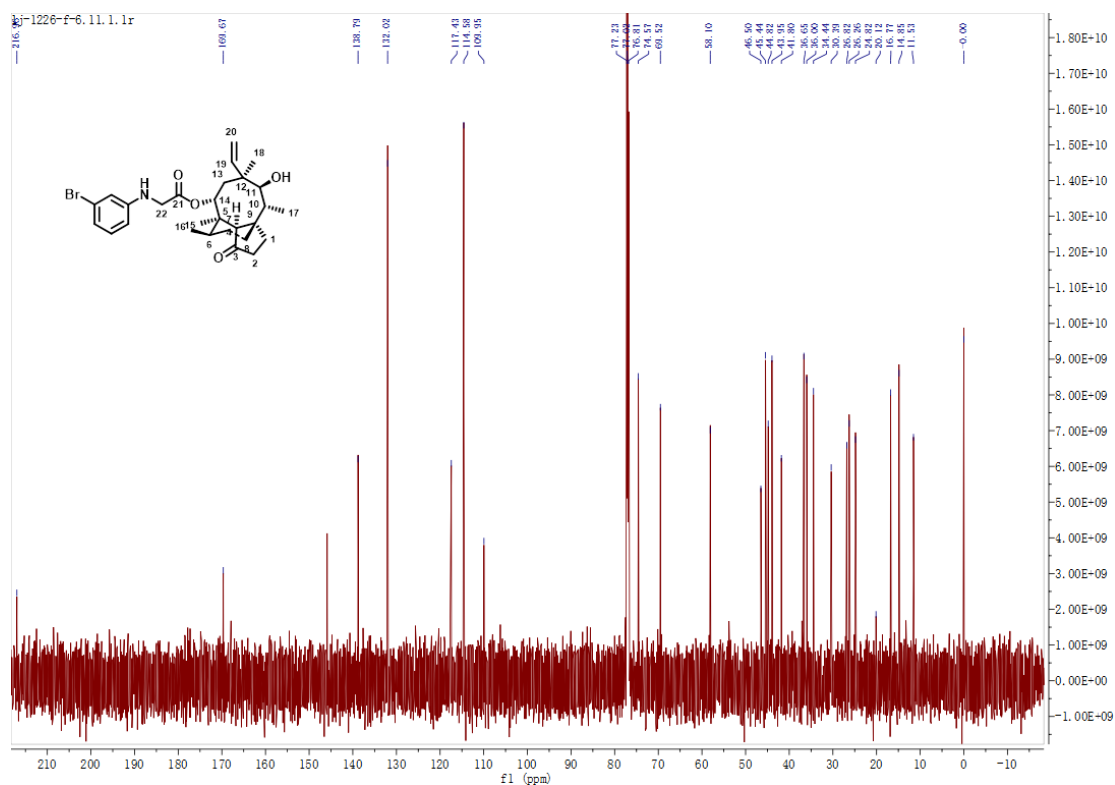

Figure SI 5-2. <sup>13</sup>C-NMR spectrum (CDCl<sub>3</sub>, 101MHz) of compound 12.

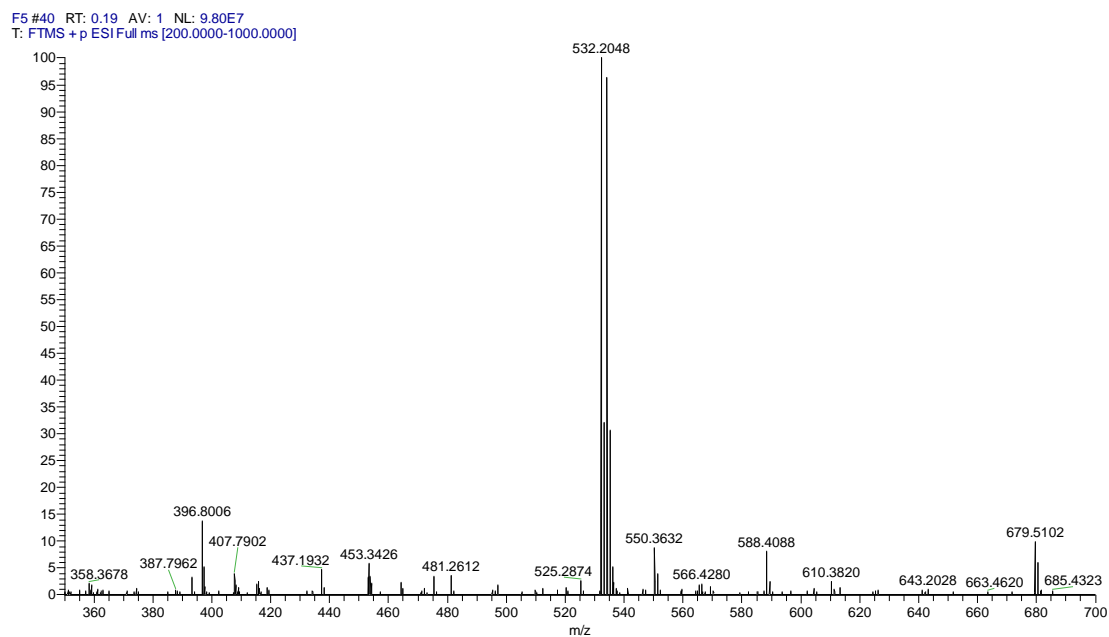

Figure SI 5-3. HR Mass spectrum (ESI) of compound 12.

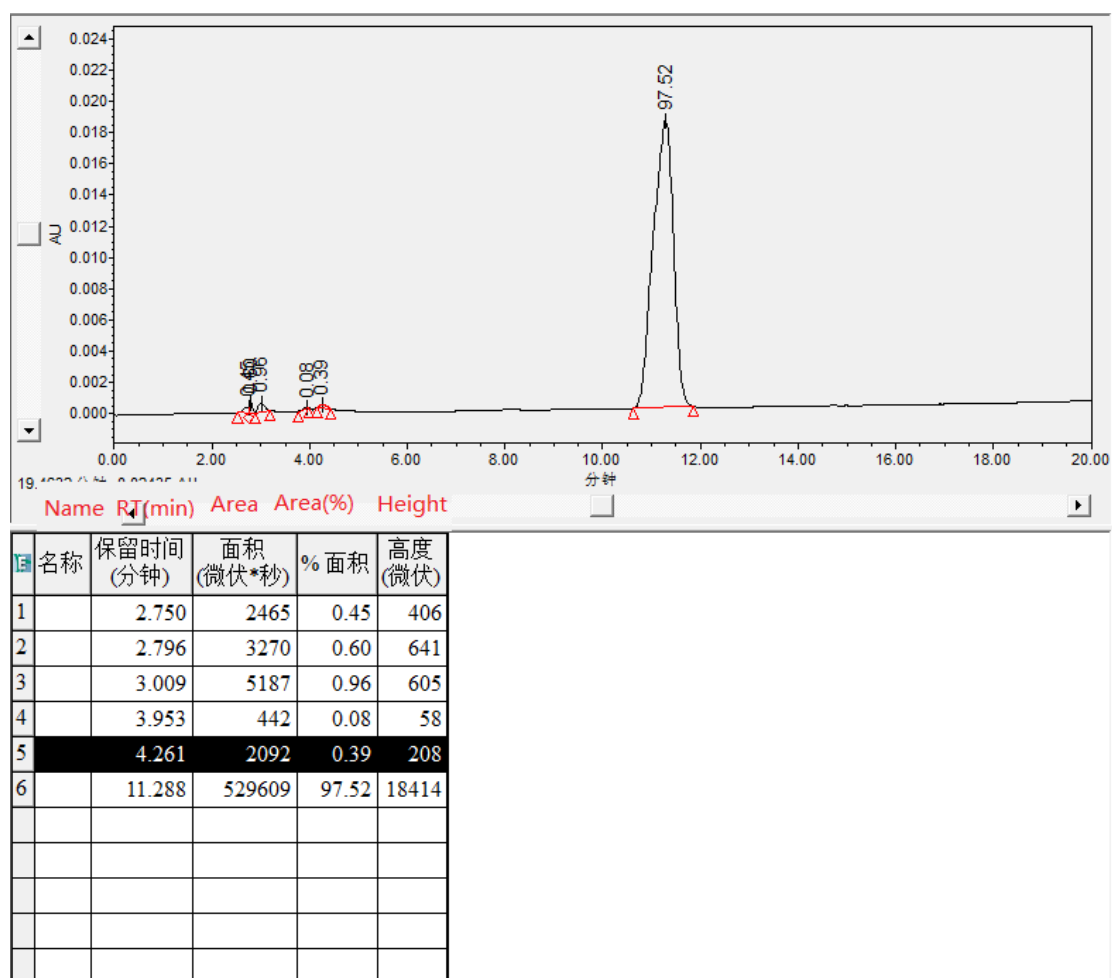

Figure SI 5-4. HPLC of compound 12.

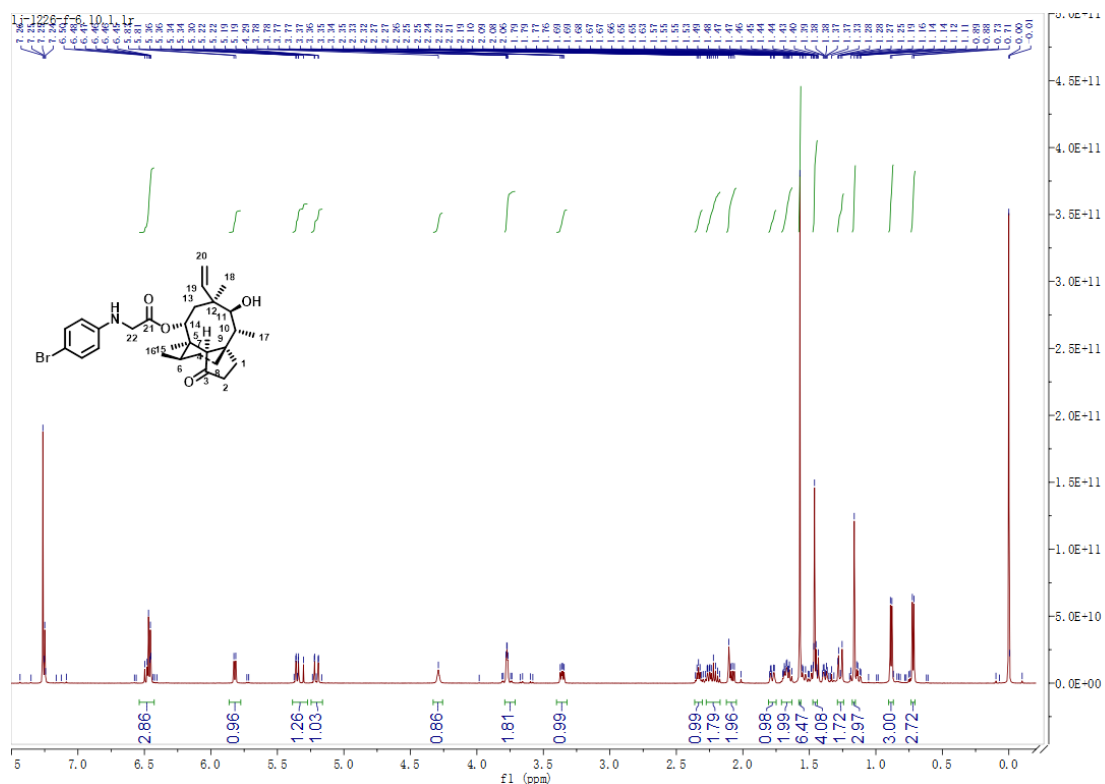

Figure SI 6-1.  $^1\text{H}$ -NMR spectrum (CDCl<sub>3</sub>, 400MHz) of compound 13.

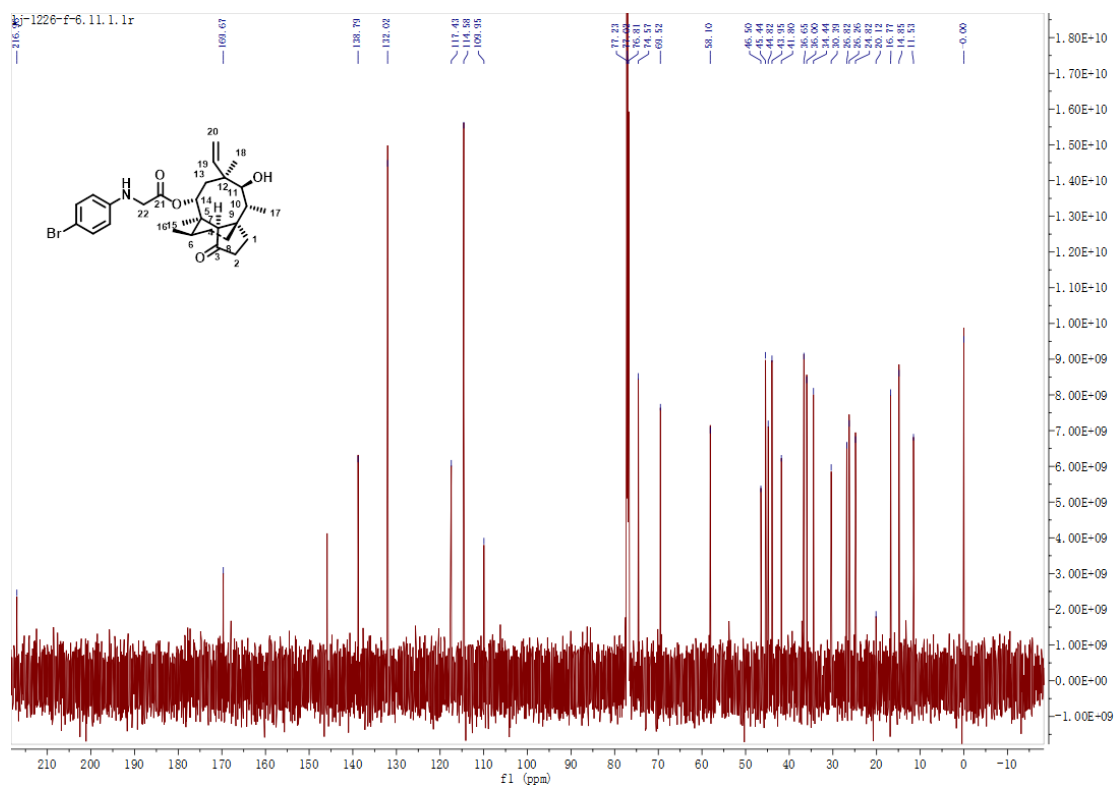

Figure SI 6-2.  $^{13}\text{C}$ -NMR spectrum (CDCl<sub>3</sub>, 101MHz) of compound 13.

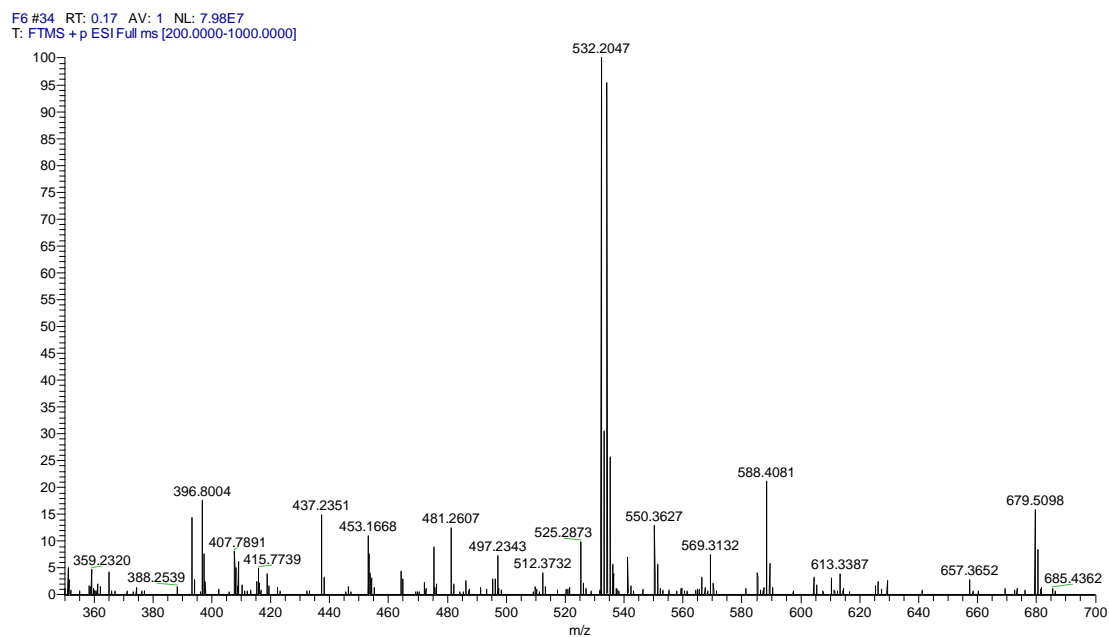

Figure SI 6-3. HR Mass spectrum (ESI) of compound 13.

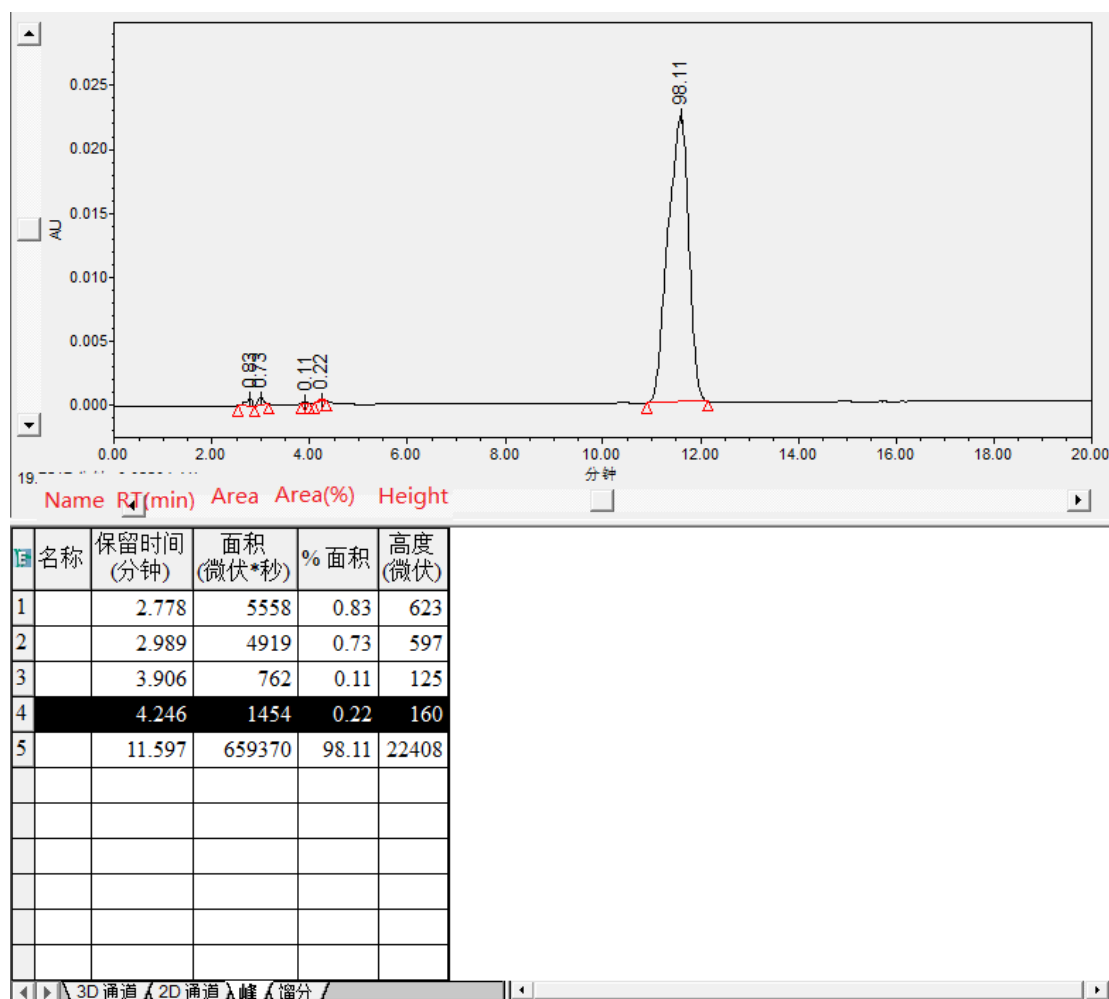

Figure SI 6-4. HPLC of compound 13.

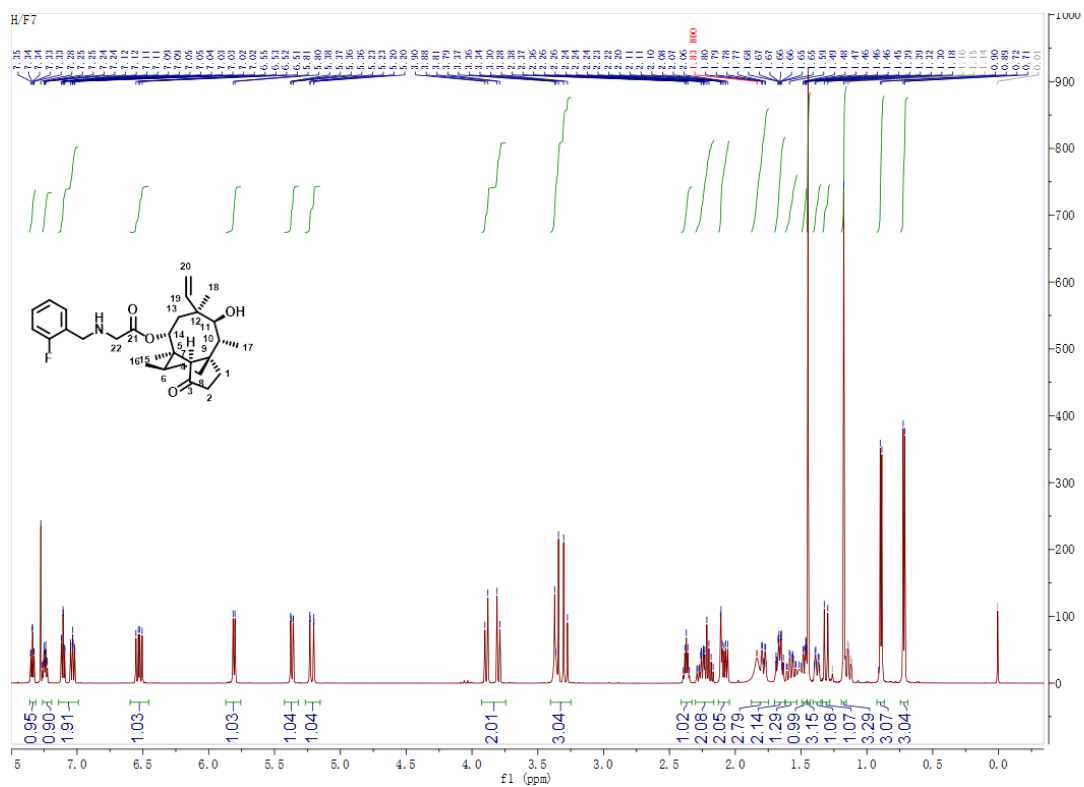

Figure SI 7-1. <sup>1</sup>H-NMR spectrum (CDCl<sub>3</sub>, 400MHz) of compound 14.

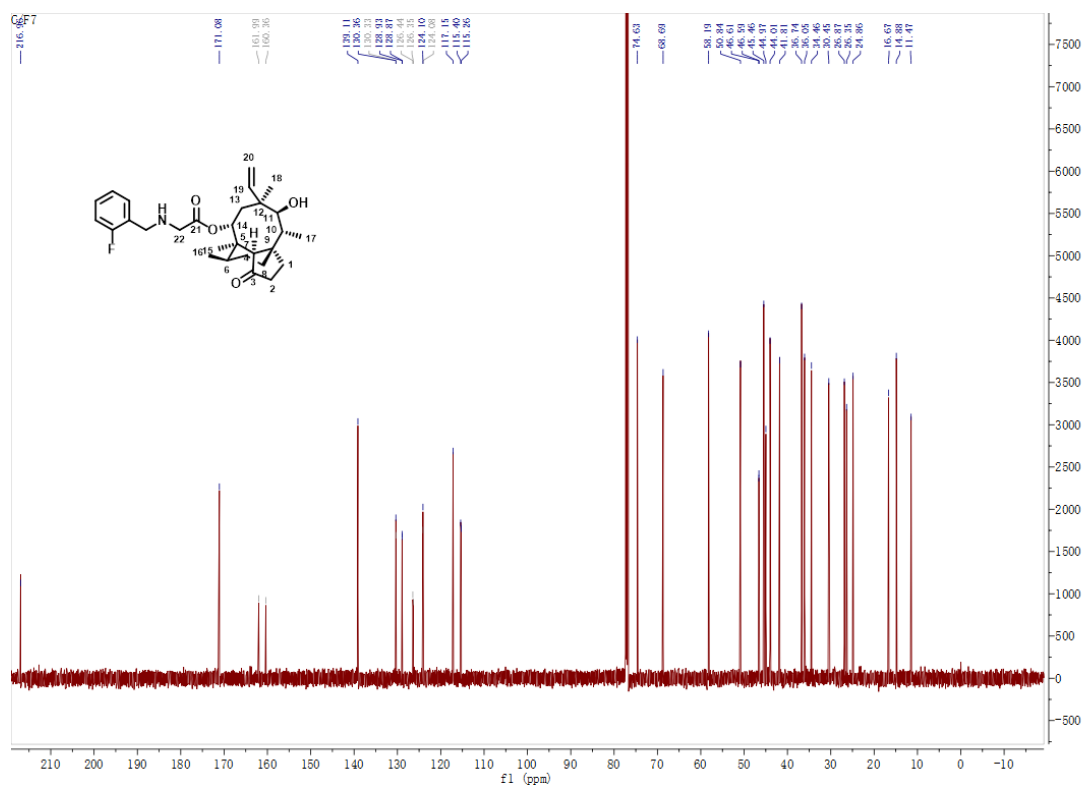

Figure SI 7-2. <sup>13</sup>C-NMR spectrum (CDCl<sub>3</sub>, 101MHz) of compound 14.

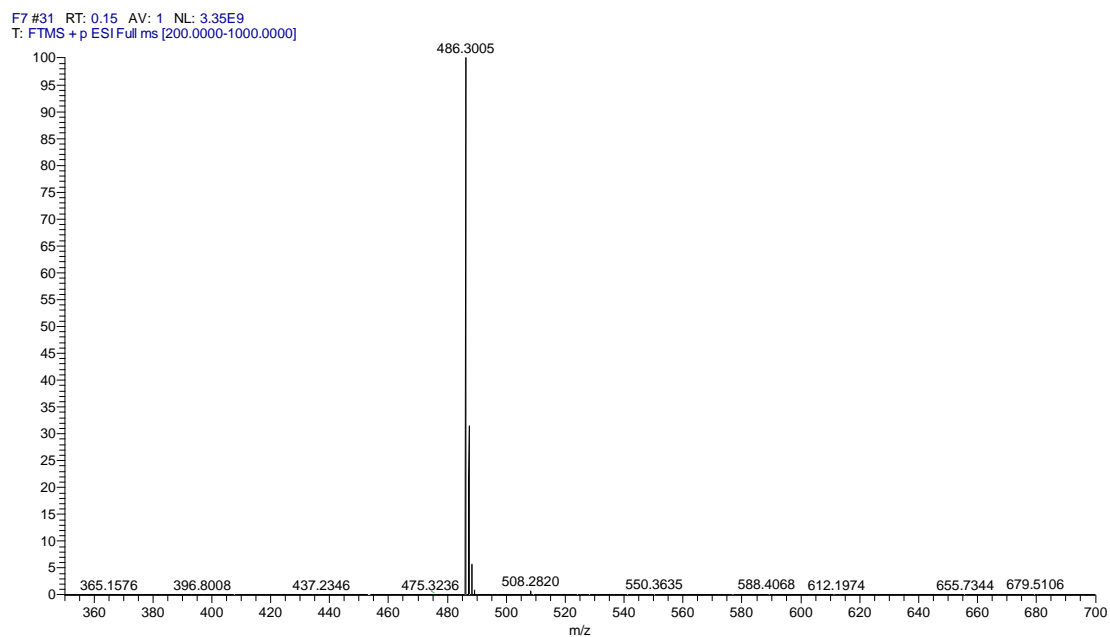

Figure SI 7-3. HR Mass spectrum (ESI) of compound 14.

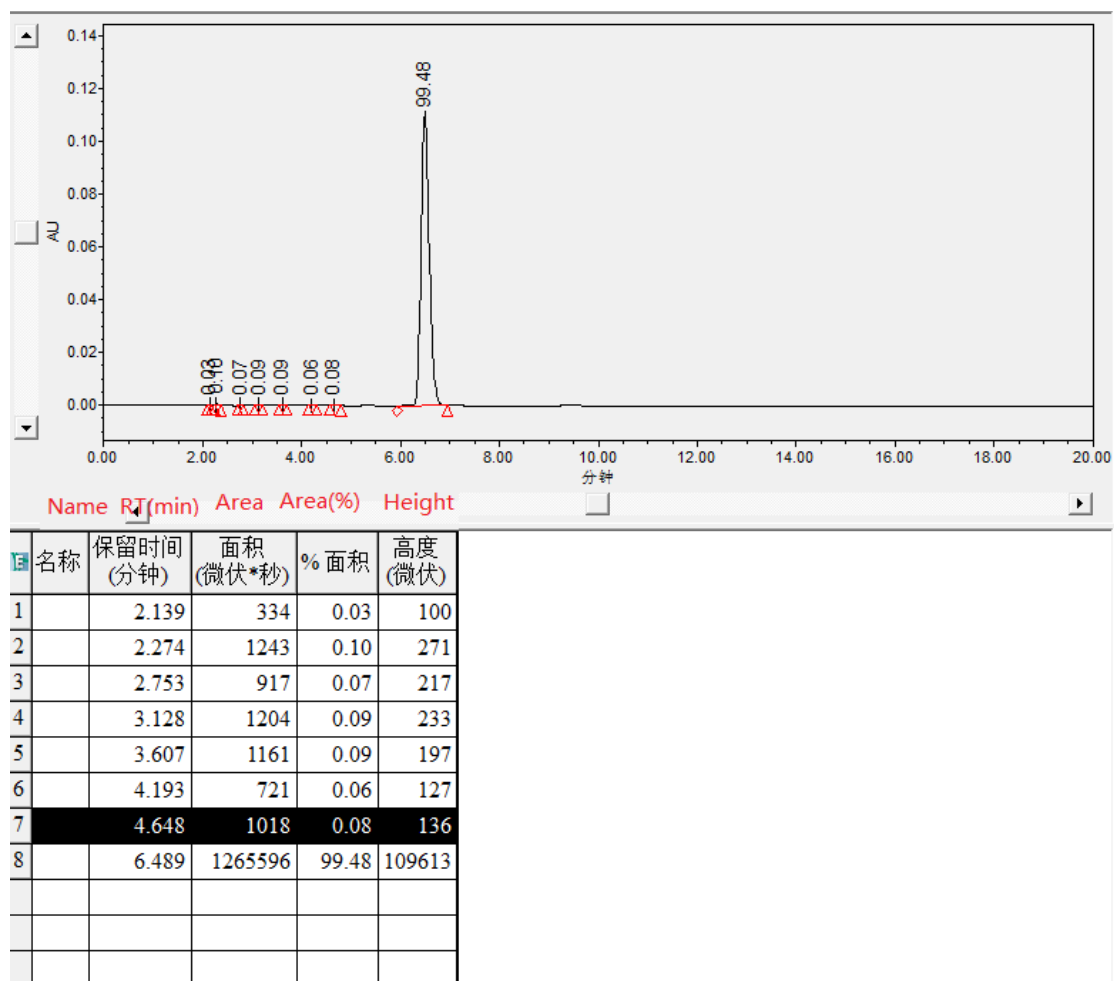

Figure SI 7-4. HPLC of compound 14.

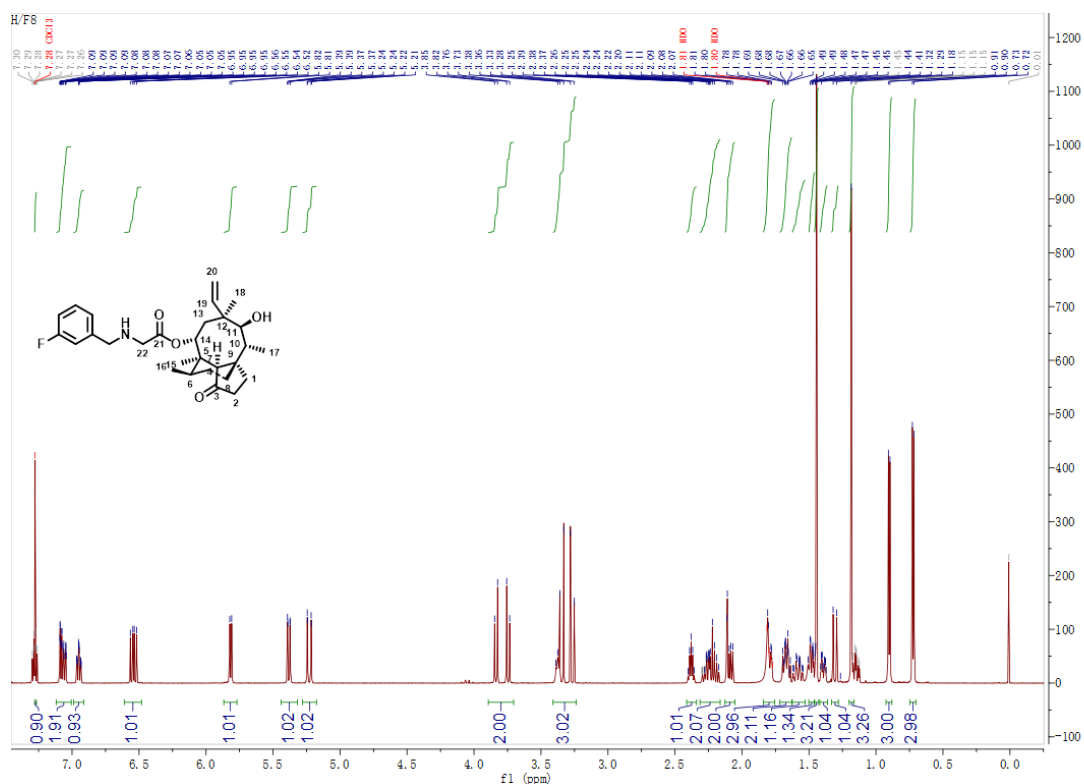

Figure SI 8-1. <sup>1</sup>H-NMR spectrum (CDCl<sub>3</sub>, 400MHz) of compound 15.

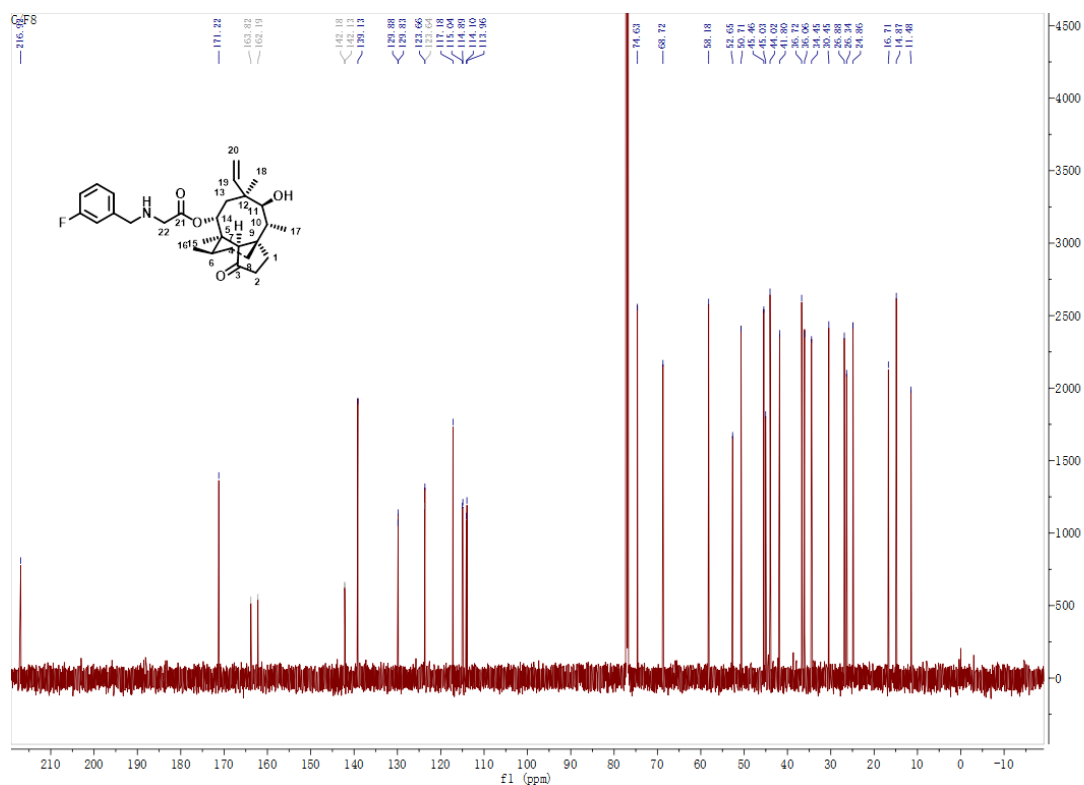

Figure SI 8-2. <sup>13</sup>C-NMR spectrum (CDCl<sub>3</sub>, 101MHz) of compound 15.



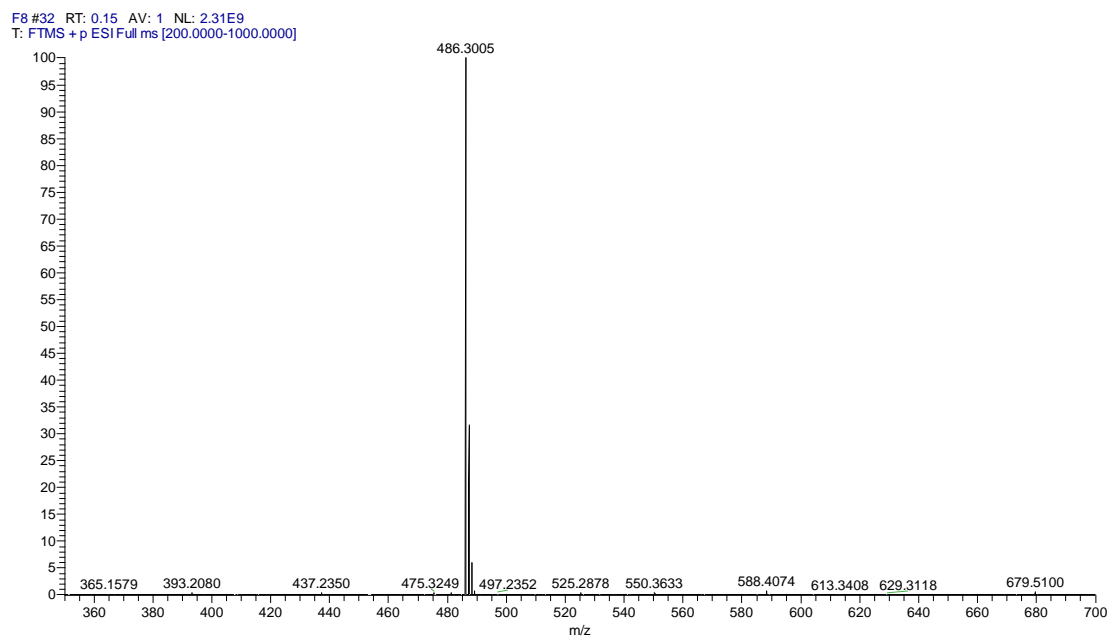

**Figure SI 8-3. HR Mass spectrum (ESI) of compound 15.**

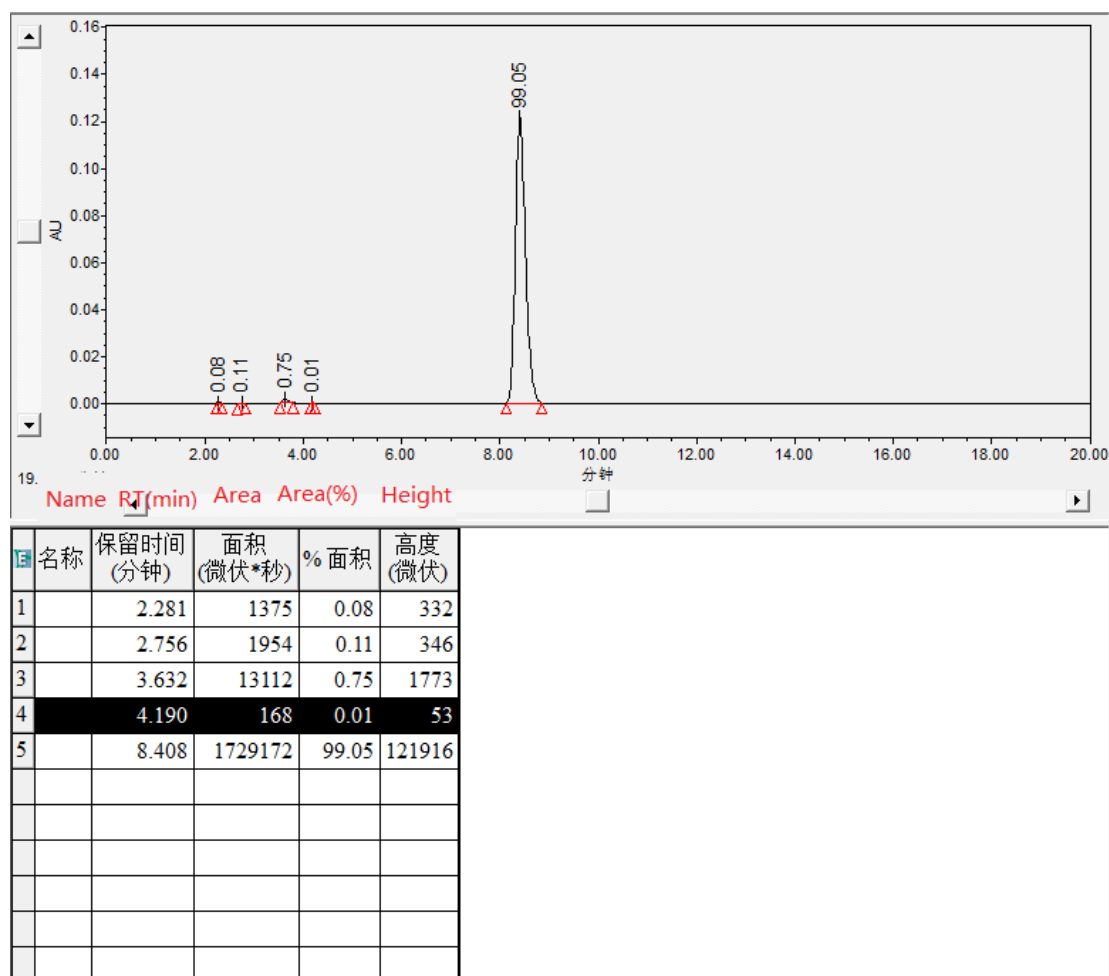

**Figure SI 8-4. HPLC of compound 15.**

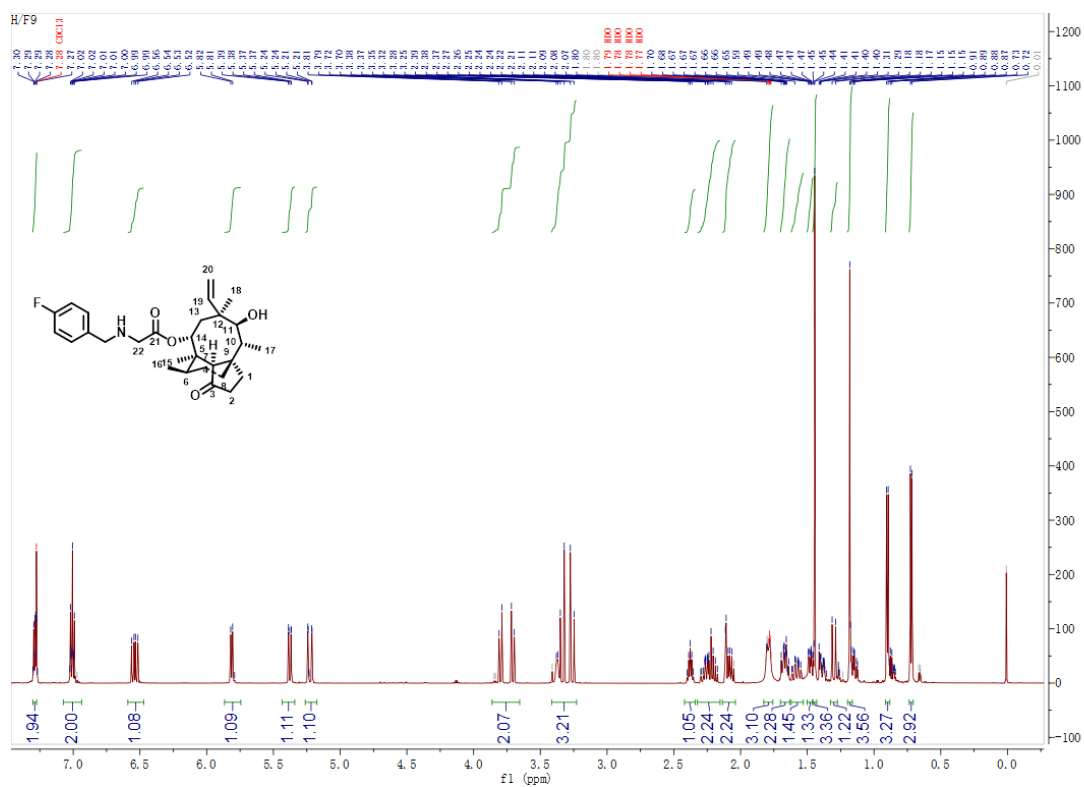

Figure SI 9-1. <sup>1</sup>H-NMR spectrum (CDCl<sub>3</sub>, 400MHz) of compound 16.

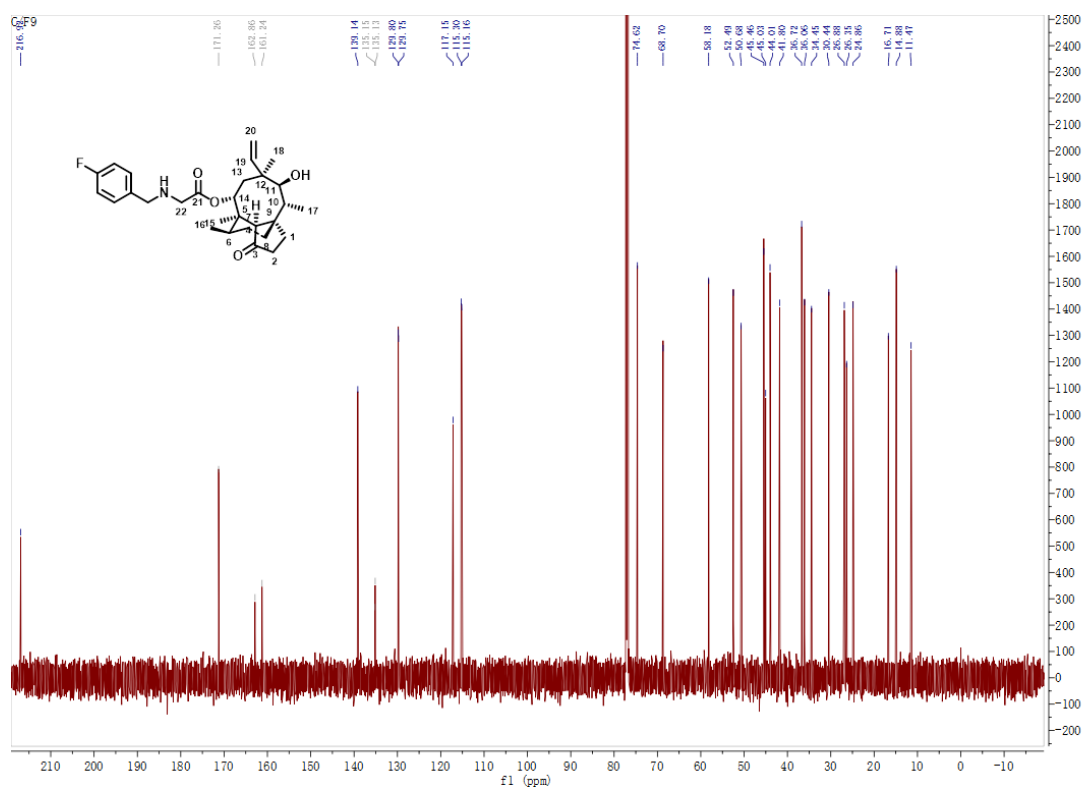

Figure SI 9-2. <sup>13</sup>C-NMR spectrum (CDCl<sub>3</sub>, 101MHz) of compound 16.

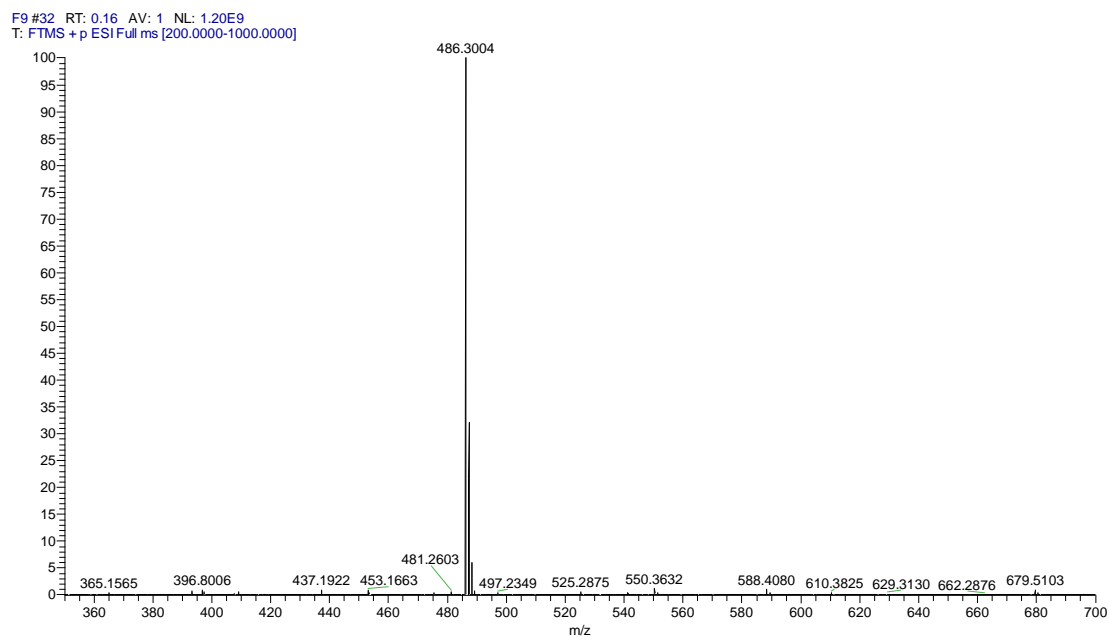

Figure SI 9-3. HR Mass spectrum (ESI) of compound 16.

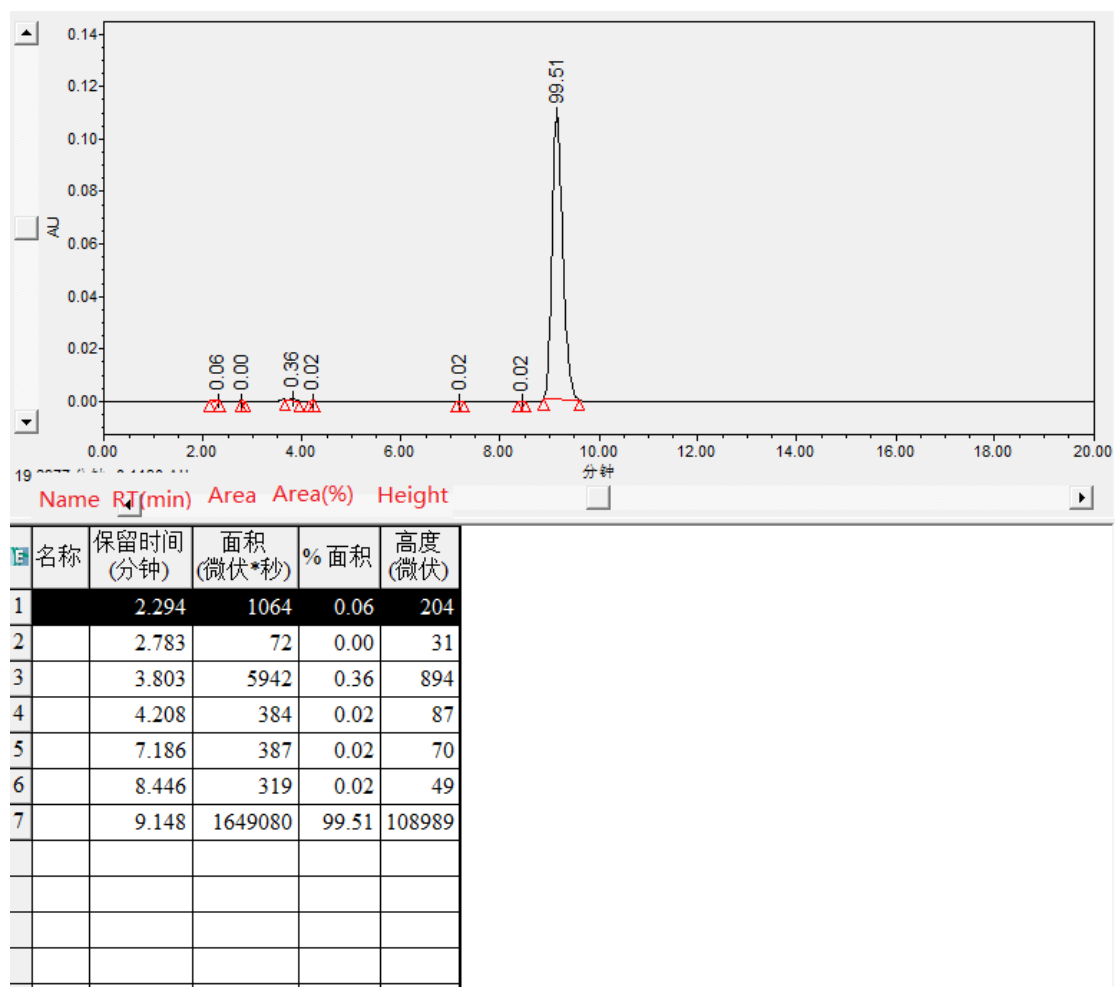

Figure SI 9-4. HPLC of compound 16.

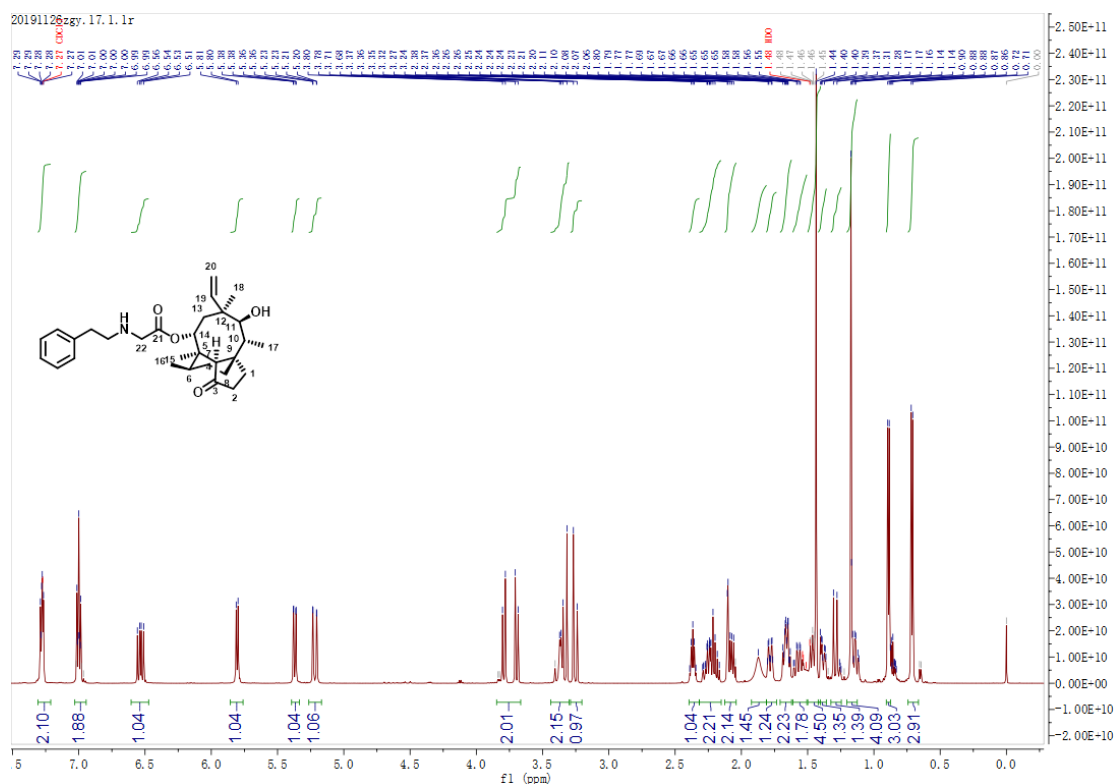

**Figure SI 10-1.**  $^1\text{H}$ -NMR spectrum (CDCl<sub>3</sub>, 400MHz) of compound 17.

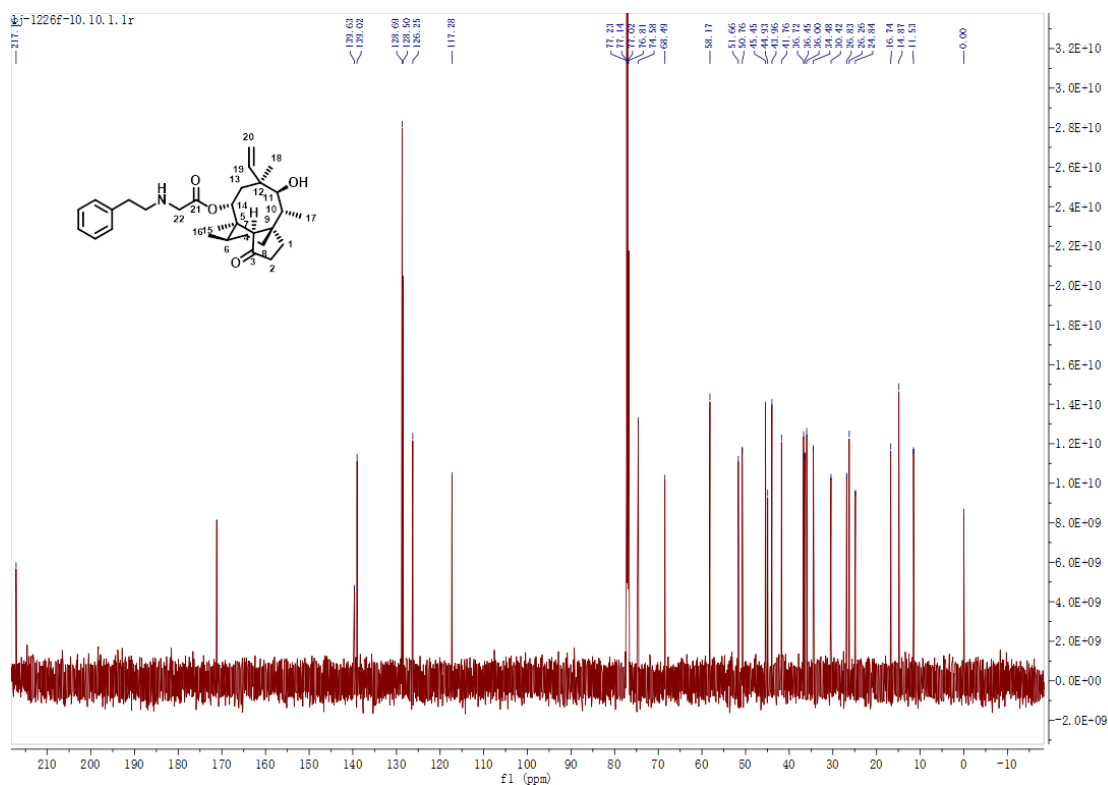

**Figure SI 10-2.**  $^{13}\text{C}$ -NMR spectrum (CDCl<sub>3</sub>, 101MHz) of compound 17.

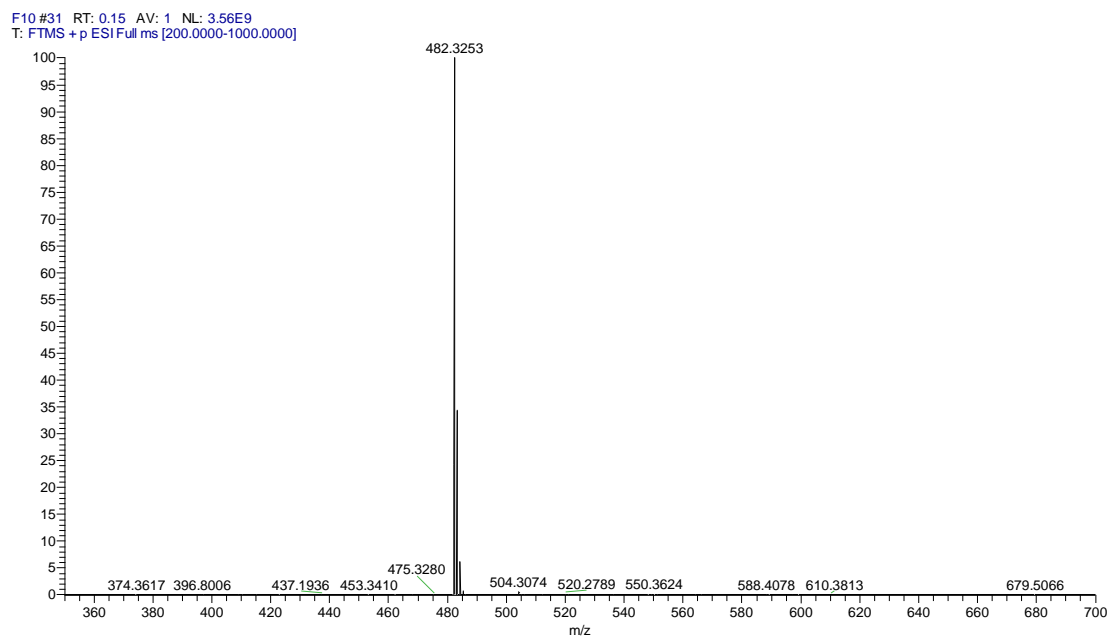

Figure SI 10-3. HR Mass spectrum (ESI) of compound 17.

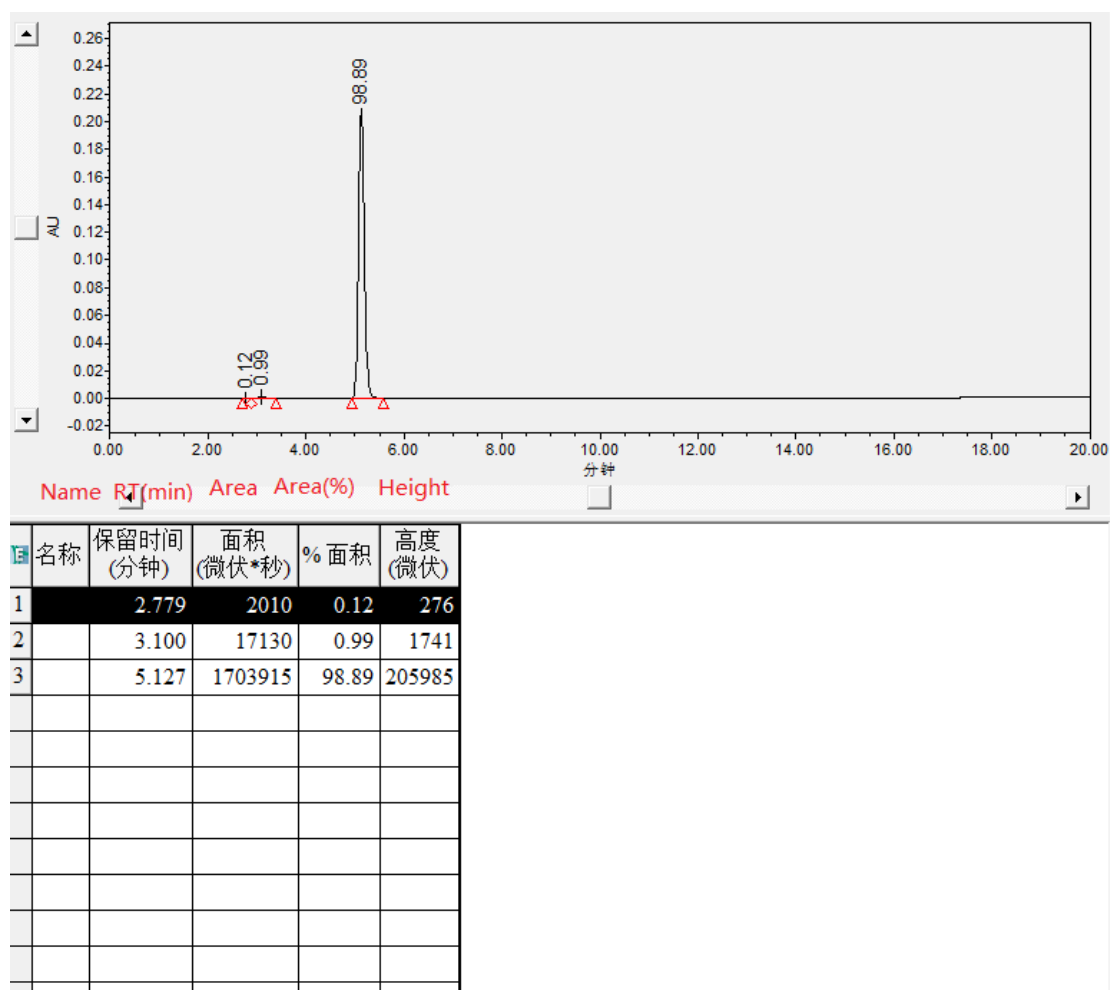

Figure SI 10-4. HPLC of compound 17.

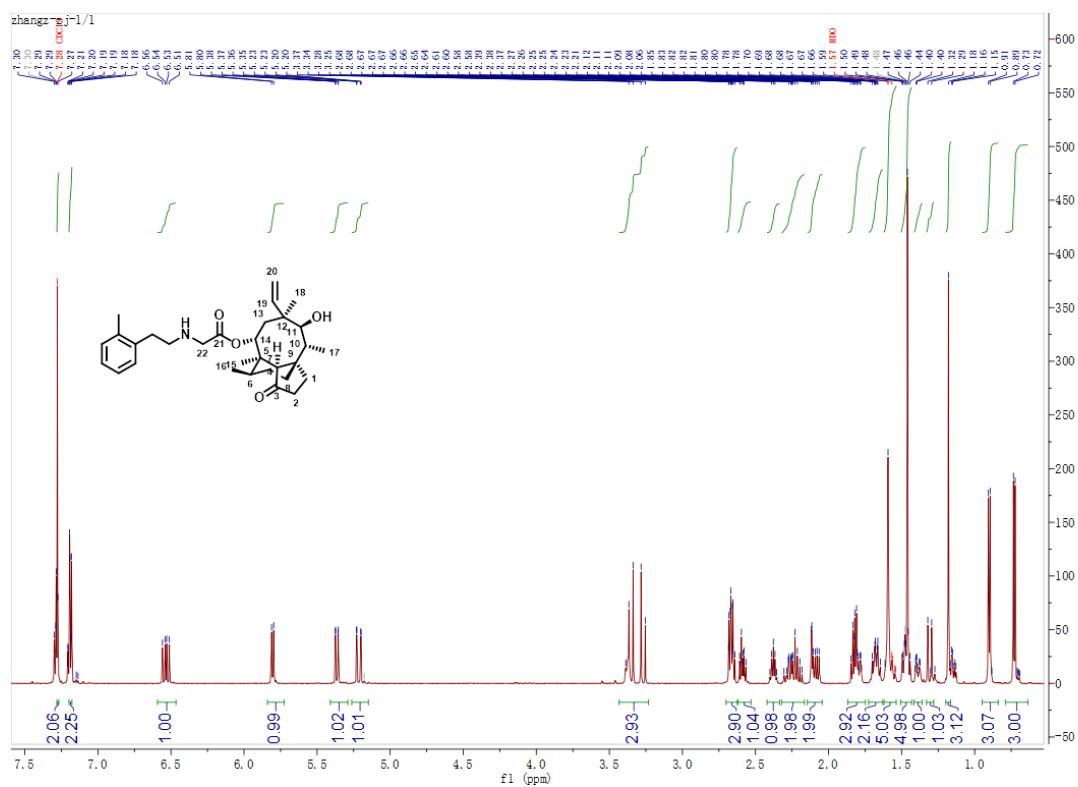

**Figure SI 11-1.**  $^1\text{H}$ -NMR spectrum ( $\text{CDCl}_3$ , 400MHz) of compound **18**.

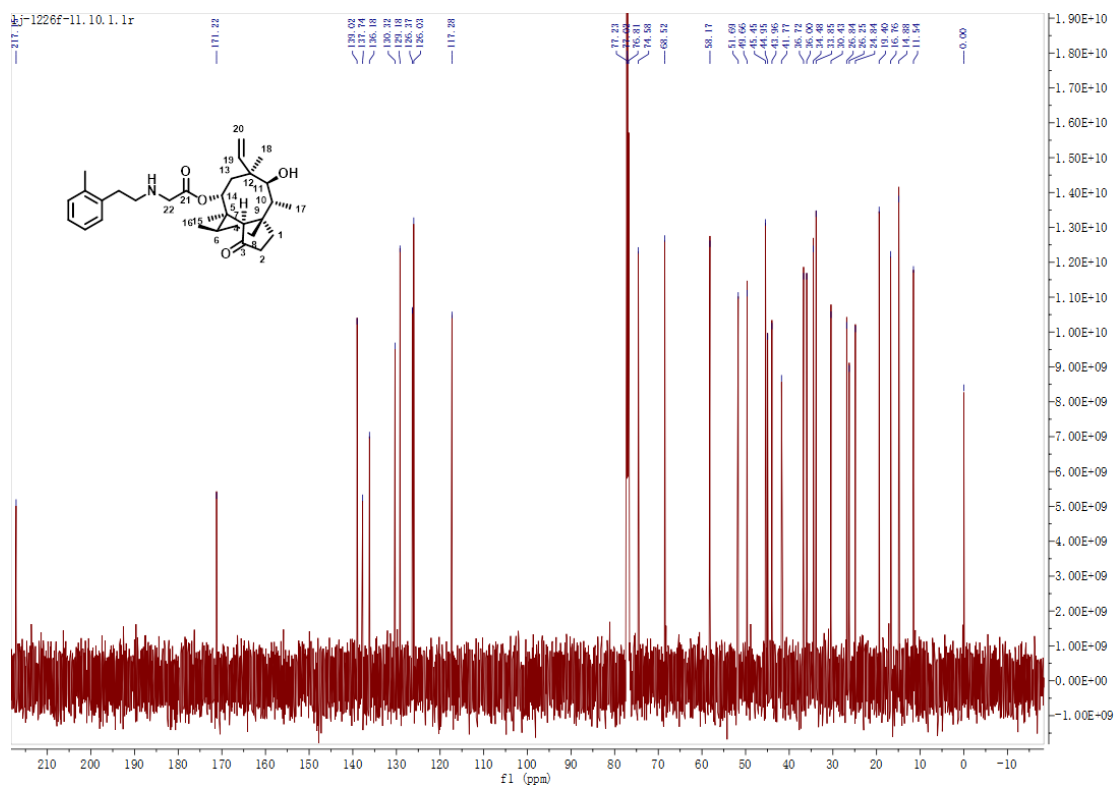

**Figure SI 11-2.**  $^{13}\text{C}$ -NMR spectrum ( $\text{CDCl}_3$ , 101MHz) of compound **18**.

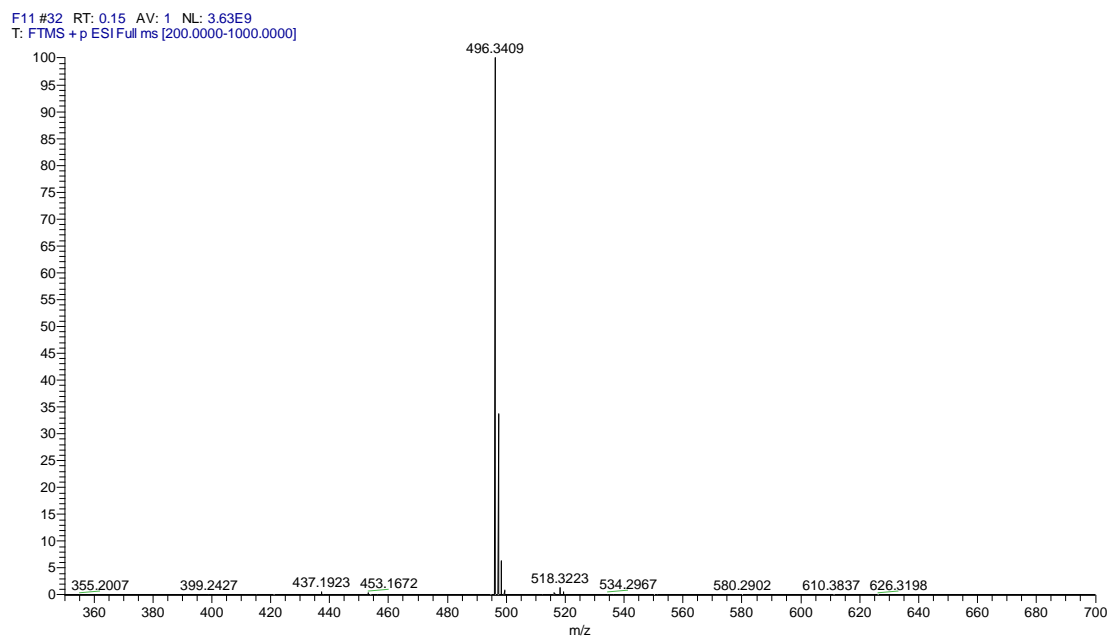

**Figure SI 11-3. HR Mass spectrum (ESI) of compound 18.**

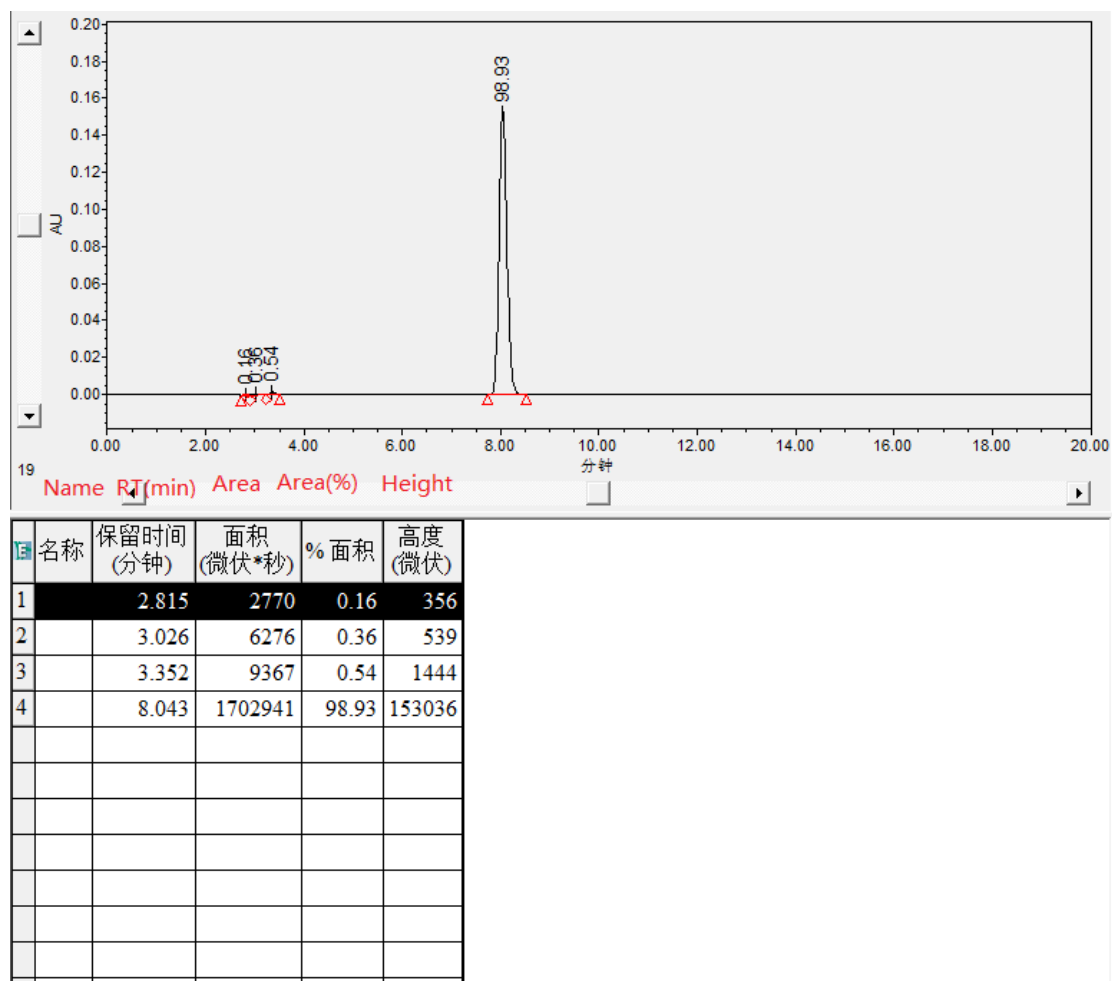

**Figure SI 11-4. HPLC of compound 18.**

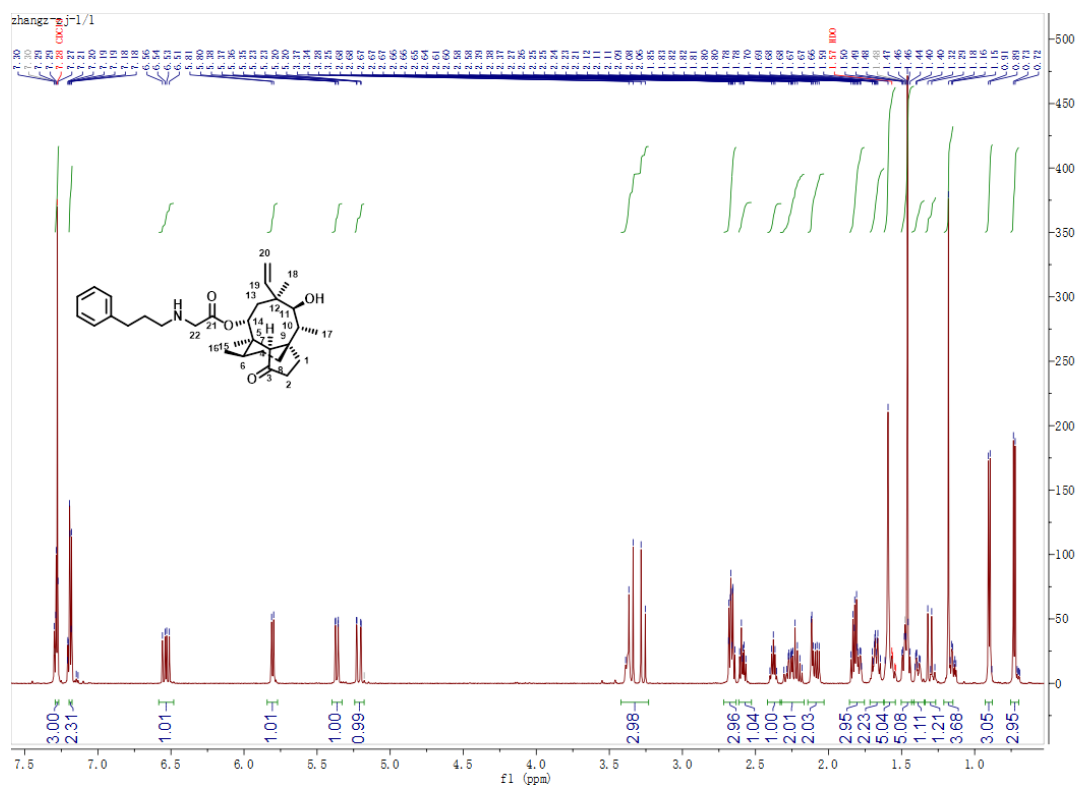

Figure SI 12-1.  $^1\text{H}$ -NMR spectrum ( $\text{CDCl}_3$ , 400MHz) of compound 19.

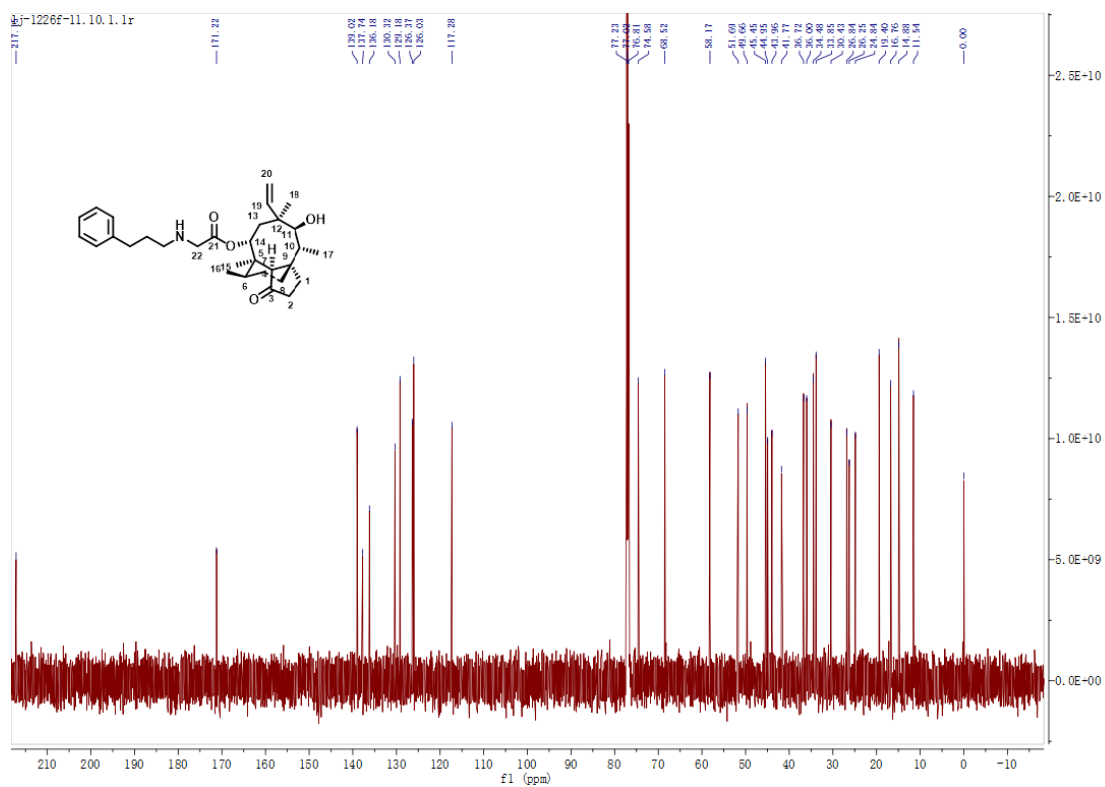

Figure SI 12-2.  $^{13}\text{C}$ -NMR spectrum ( $\text{CDCl}_3$ , 101MHz) of compound 19.



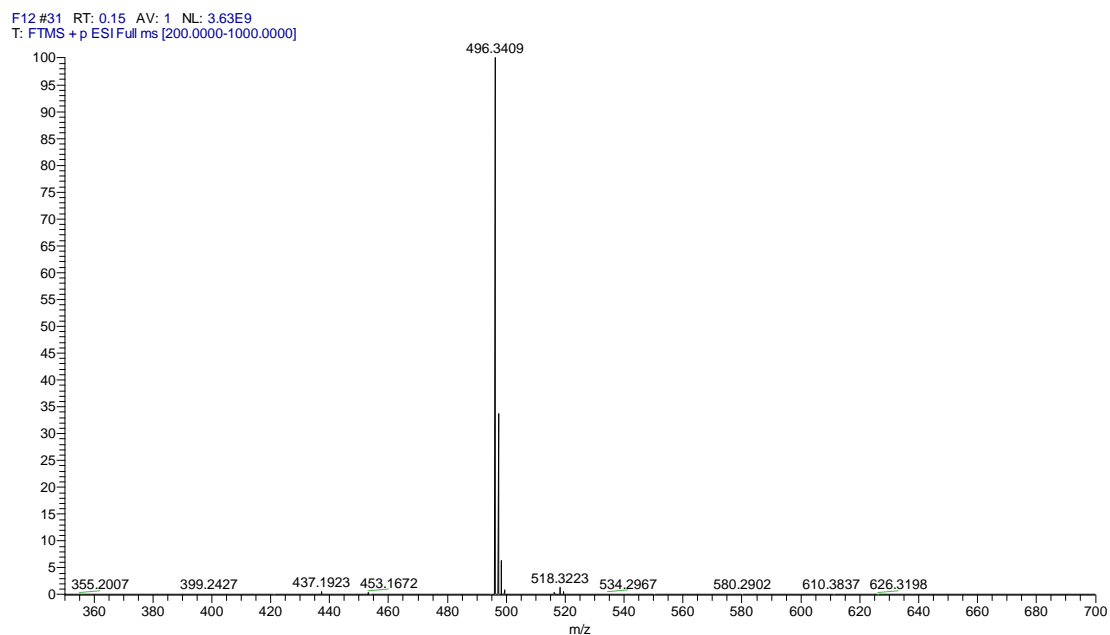

**Figure SI 12-3. HR Mass spectrum (ESI) of compound 19.**

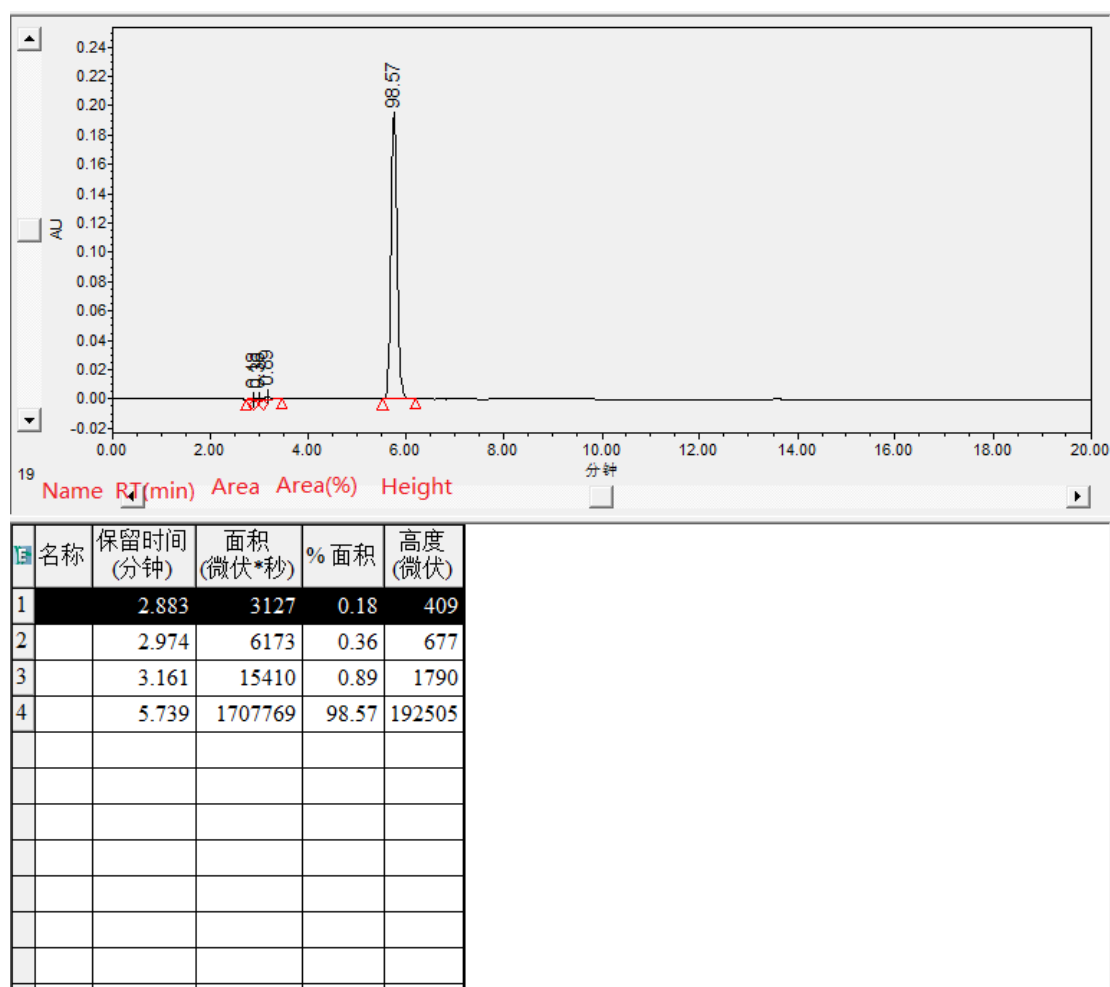

**Figure SI 12-4. HPLC of compound 19.**

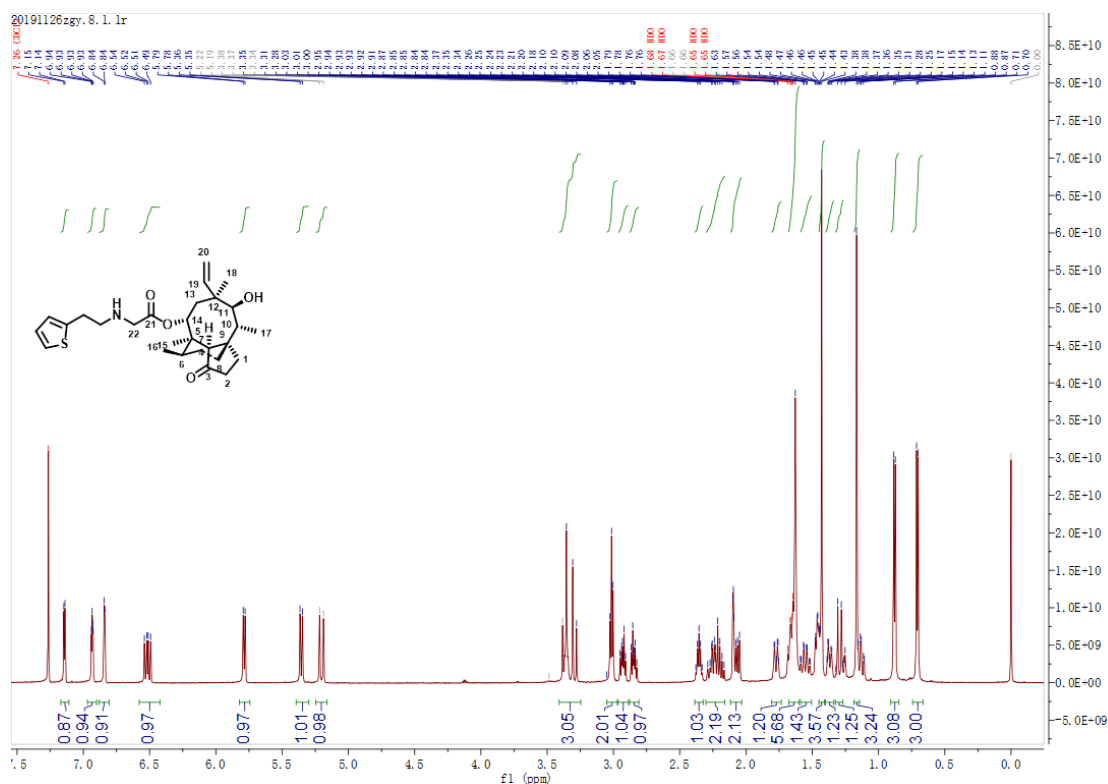

**Figure SI 13-1.**  $^1\text{H}$ -NMR spectrum ( $\text{CDCl}_3$ , 400MHz) of compound **20**.

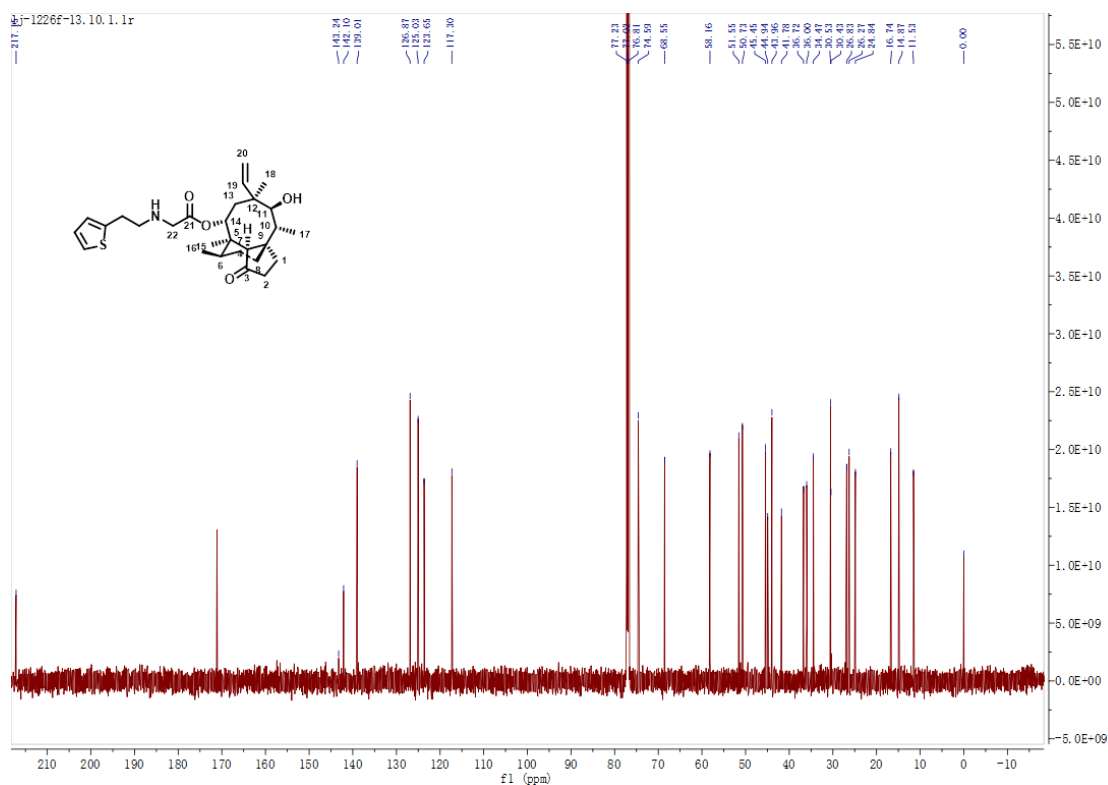

**Figure SI 13-2.**  $^{13}\text{C}$ -NMR spectrum ( $\text{CDCl}_3$ , 101MHz) of compound **20**.

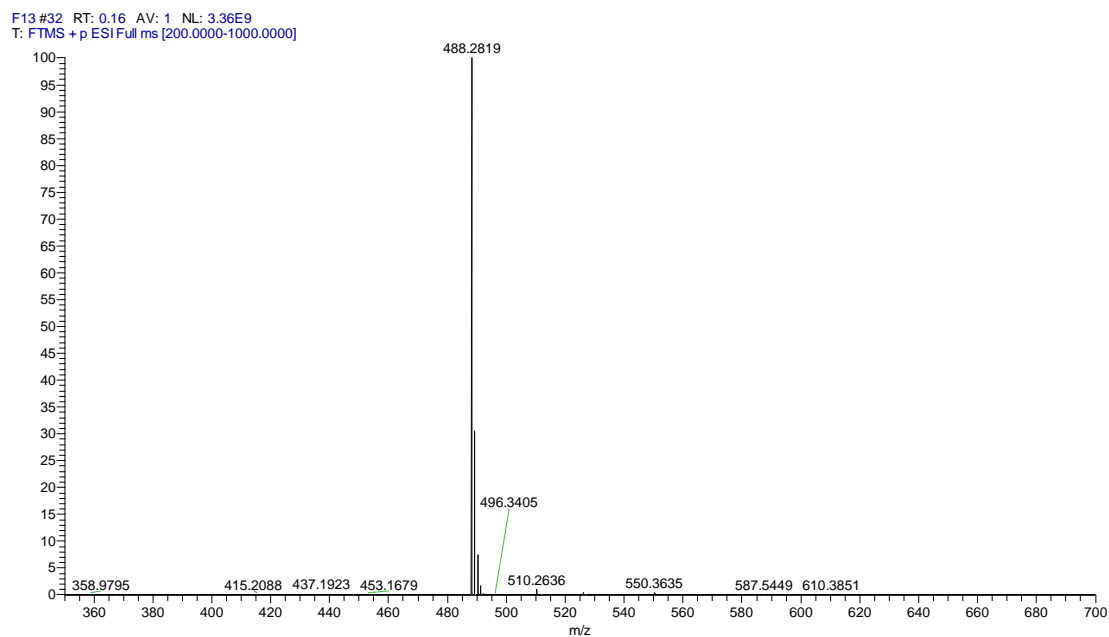

**Figure SI 13-3. HR Mass spectrum (ESI) of compound 20.**

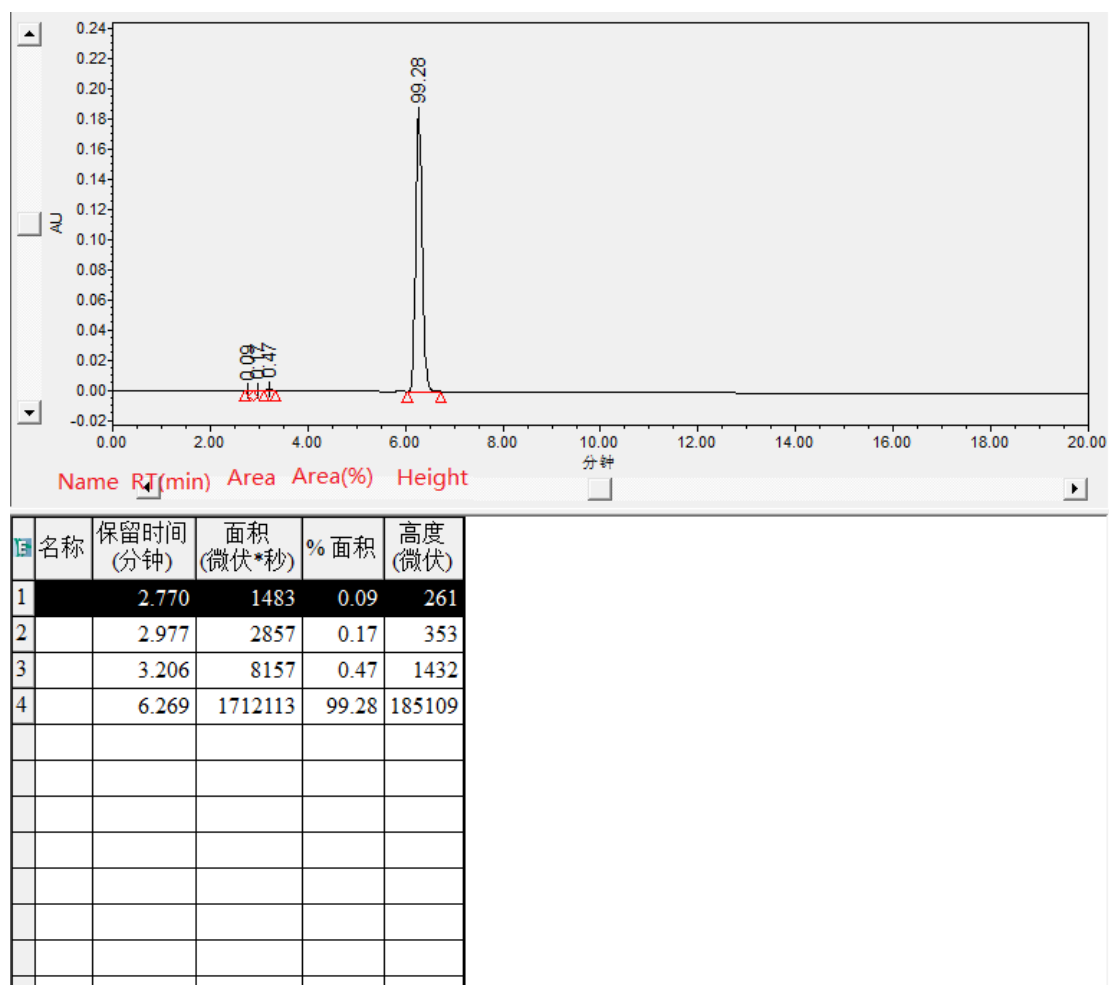

**Figure SI 13-4. HPLC of compound 20.**

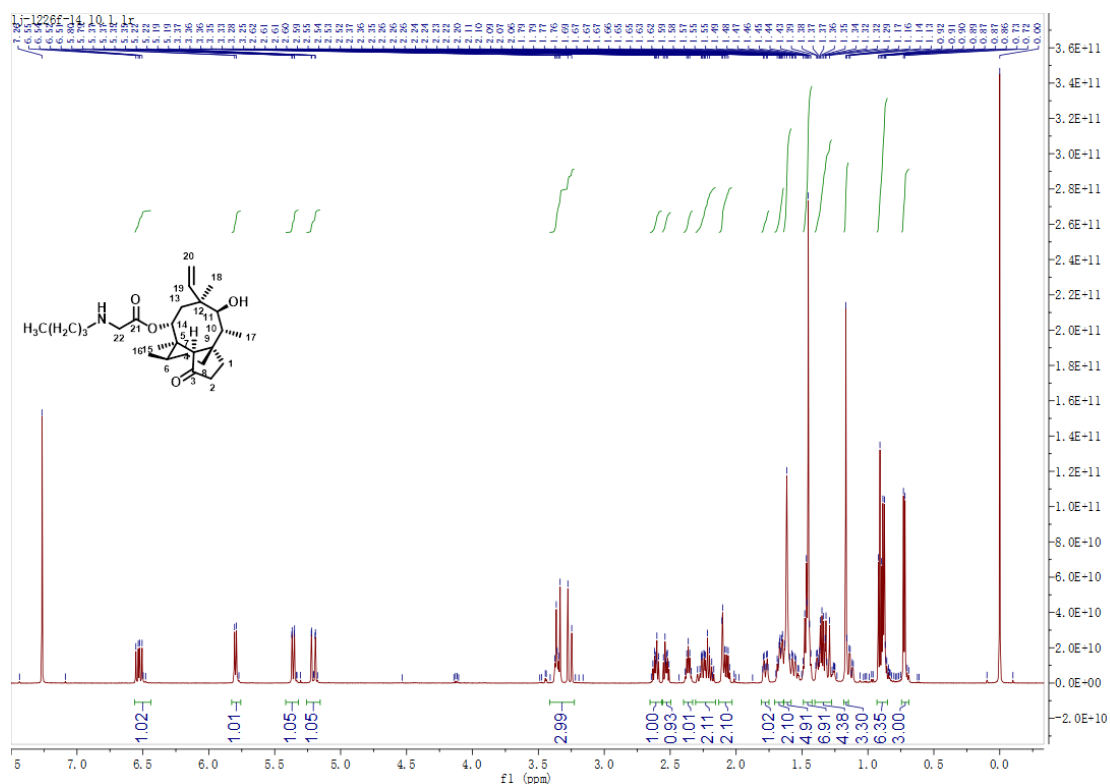

Figure SI 14-1. <sup>1</sup>H-NMR spectrum (CDCl<sub>3</sub>, 400MHz) of compound 21.

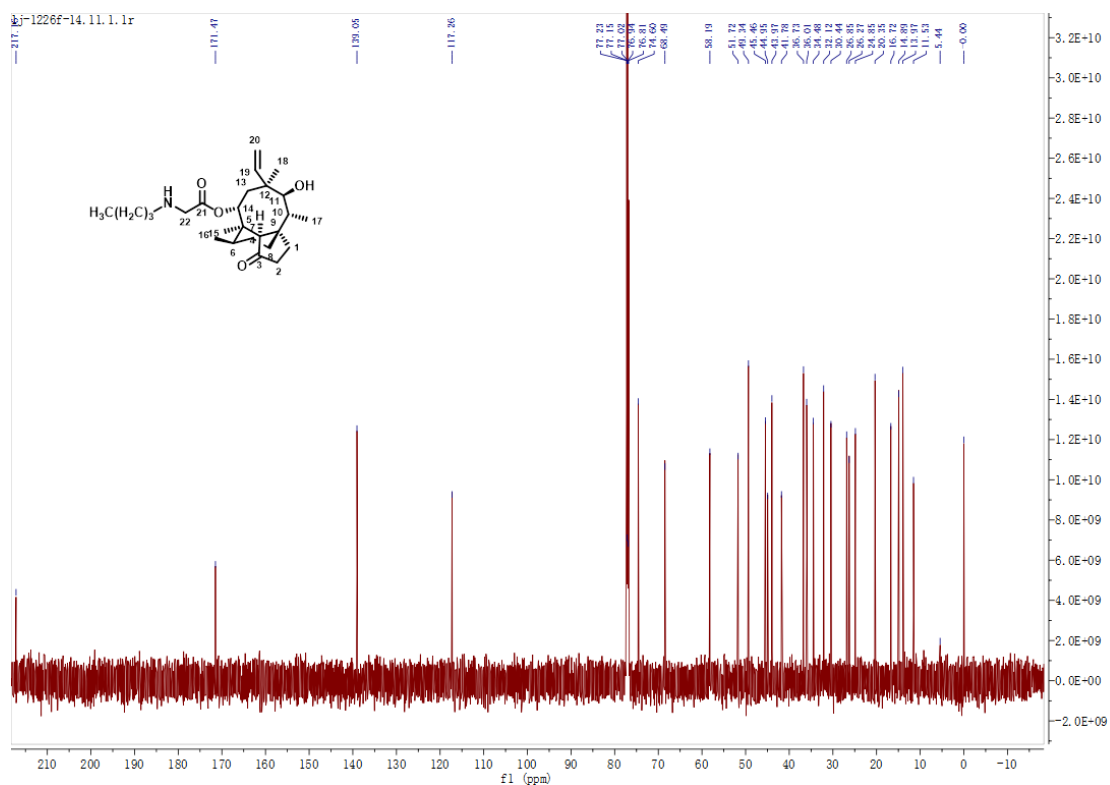

Figure SI 14-2. <sup>13</sup>C-NMR spectrum (CDCl<sub>3</sub>, 101MHz) of compound 21.

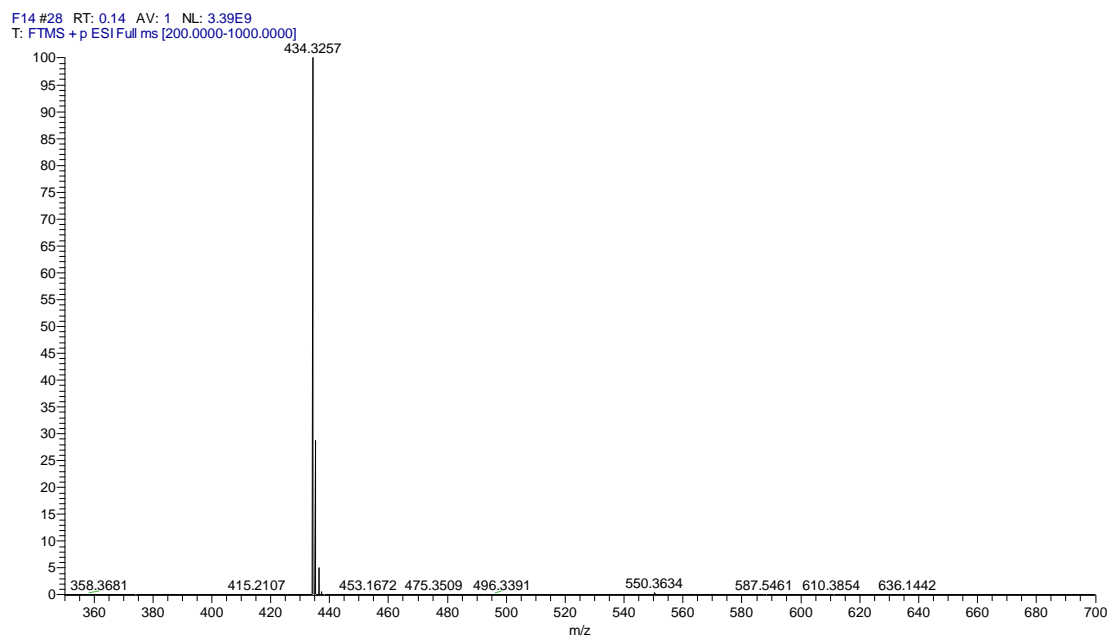

**Figure SI 14-3. HR Mass spectrum (ESI) of compound 21.**

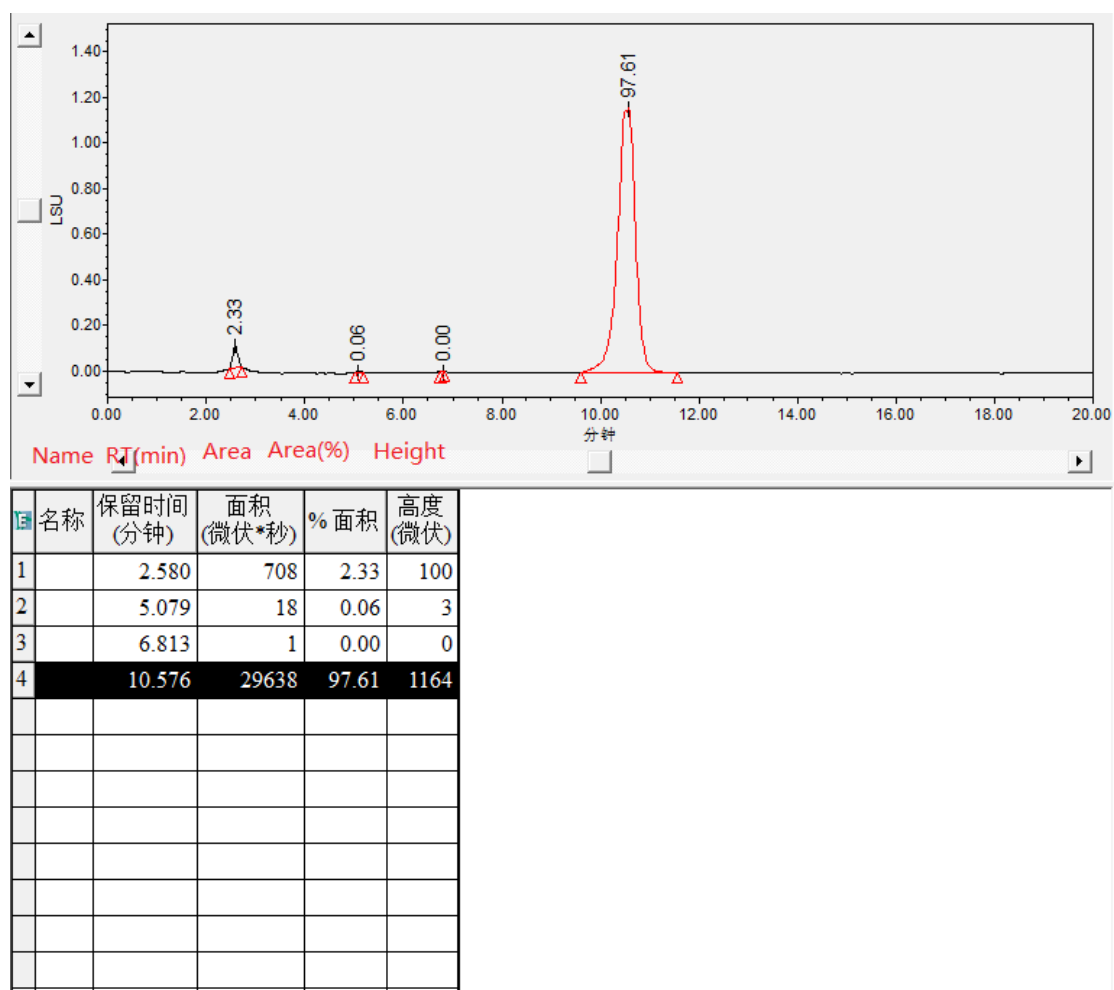

**Figure SI 14-4. HPLC of compound 21.**

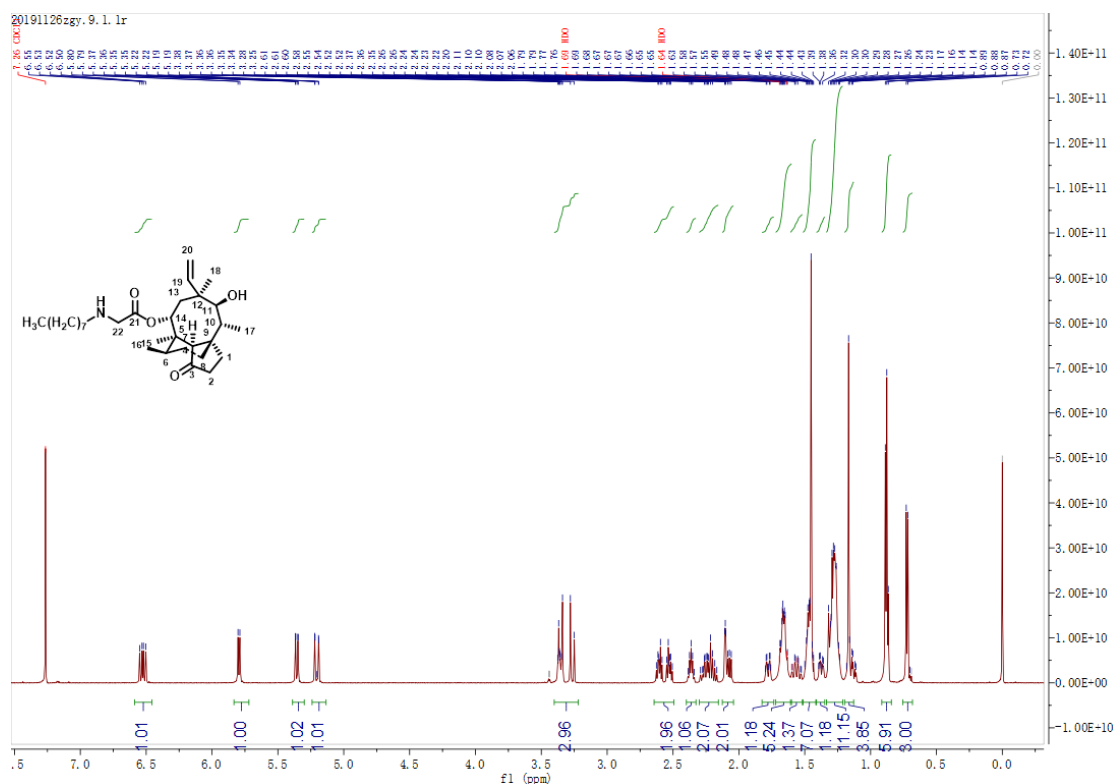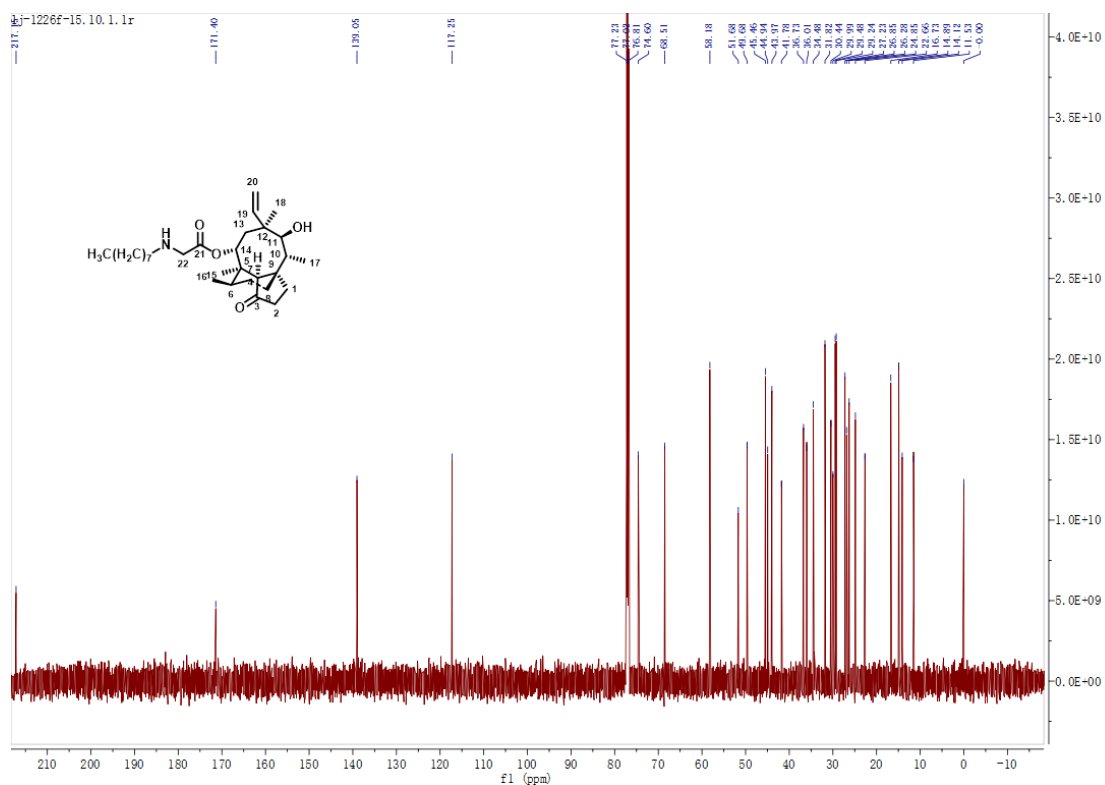



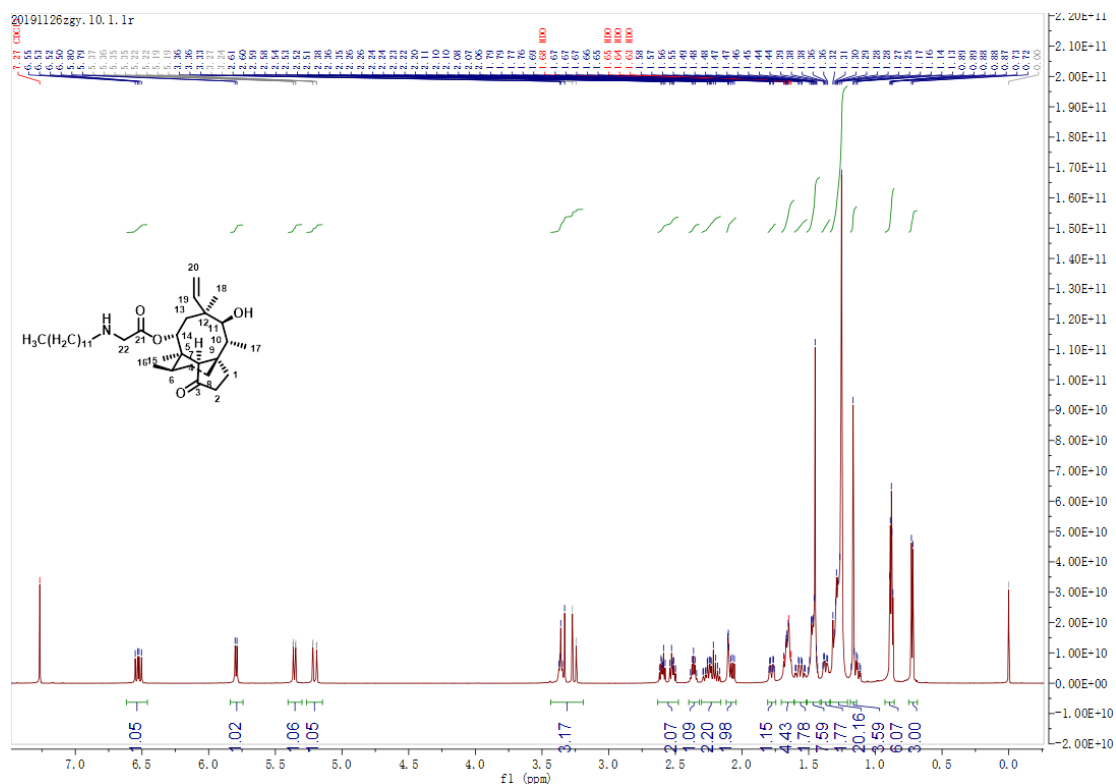

Figure SI 16-1. <sup>1</sup>H-NMR spectrum (CDCl<sub>3</sub>, 400MHz) of compound 23.

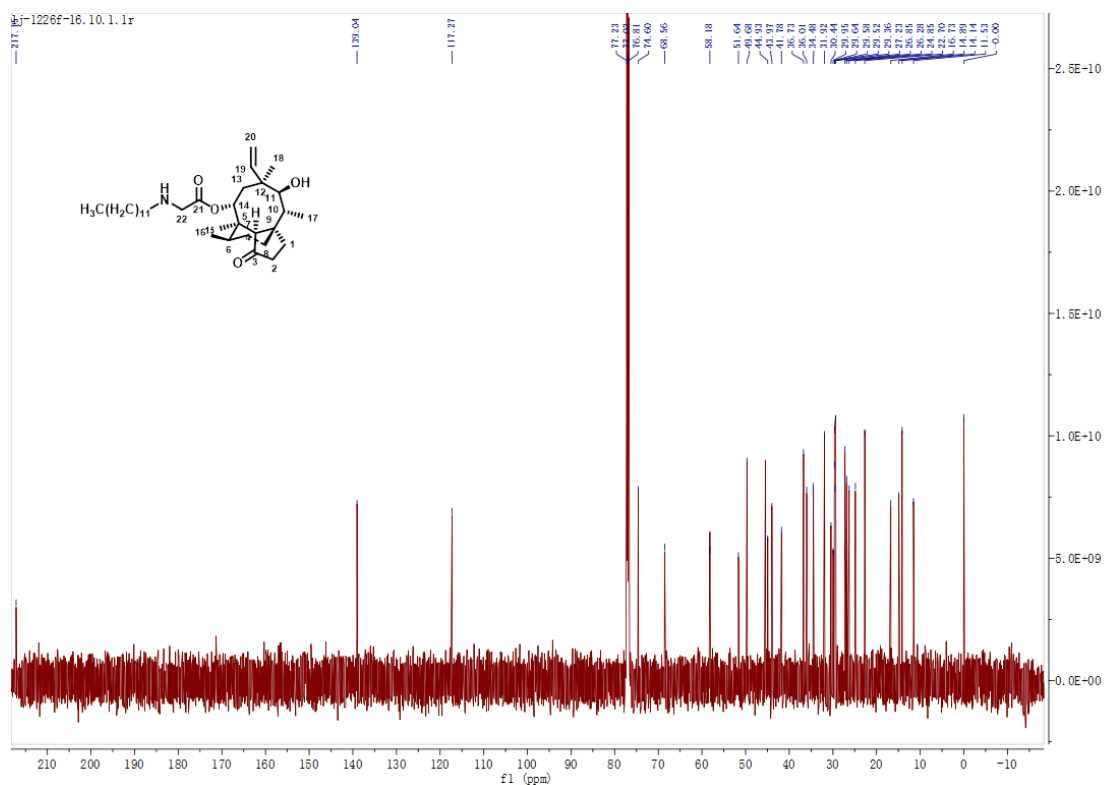

Figure SI 16-2. <sup>13</sup>C-NMR spectrum (CDCl<sub>3</sub>, 101MHz) of compound 23.



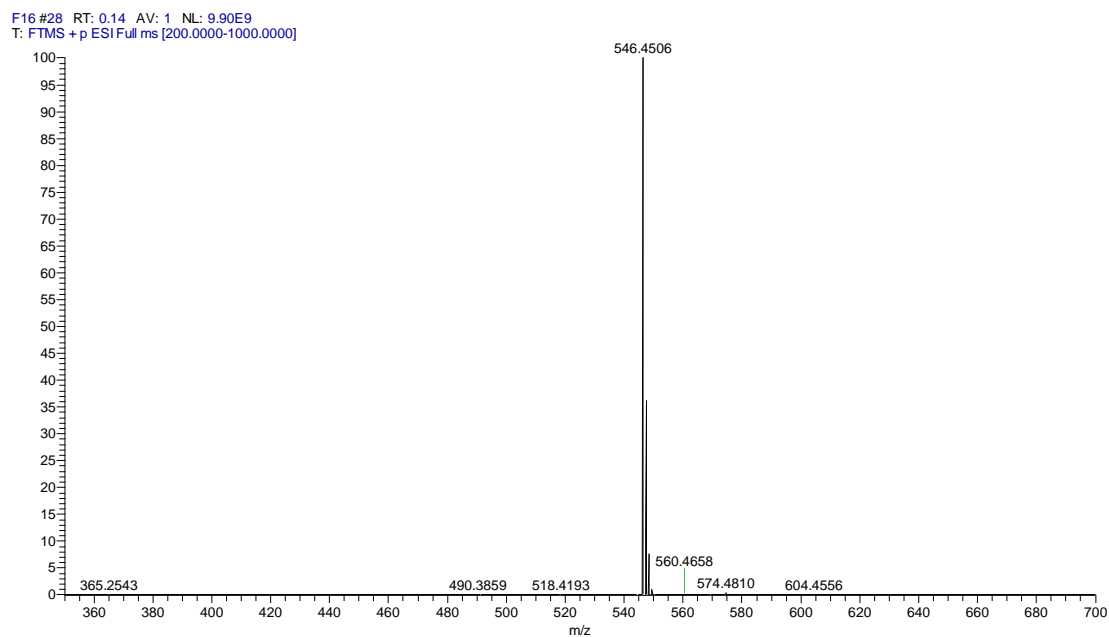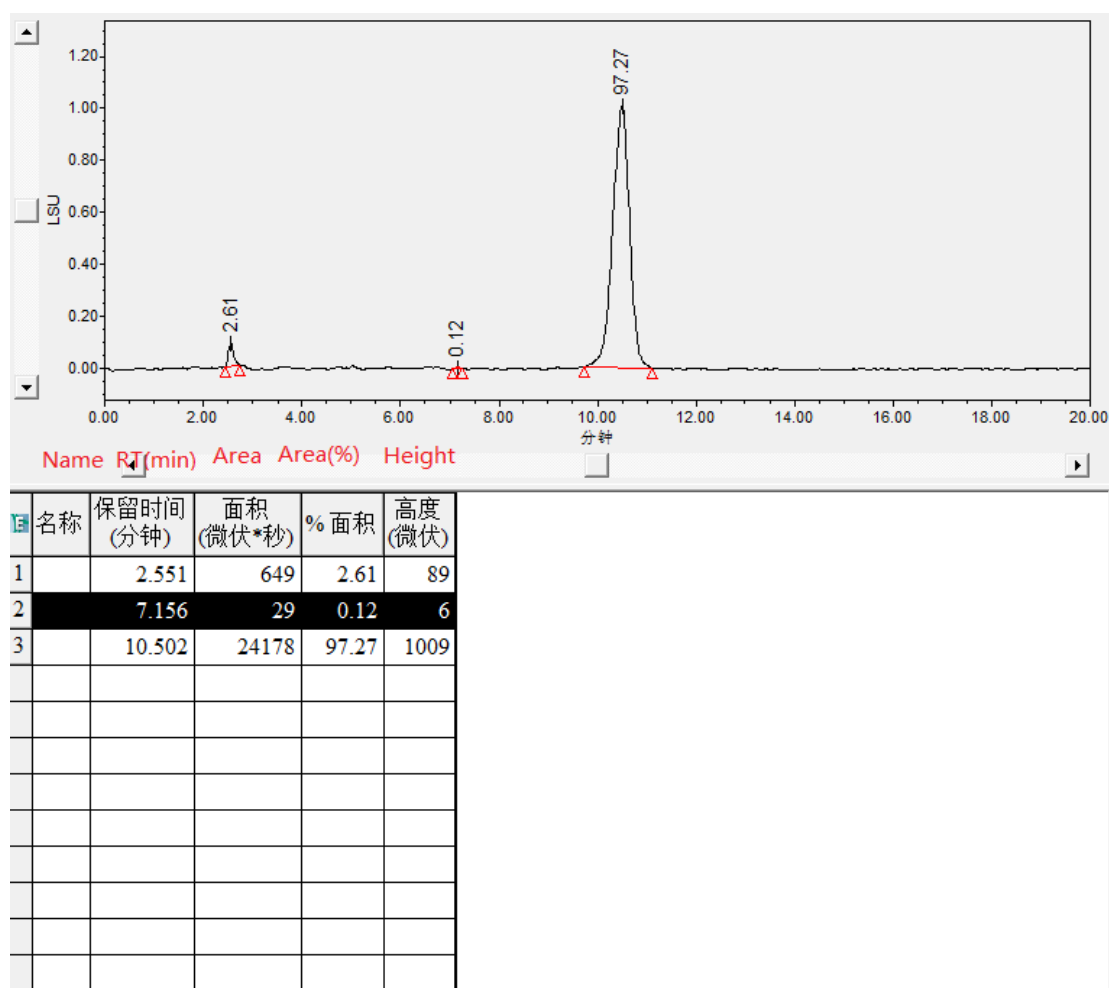

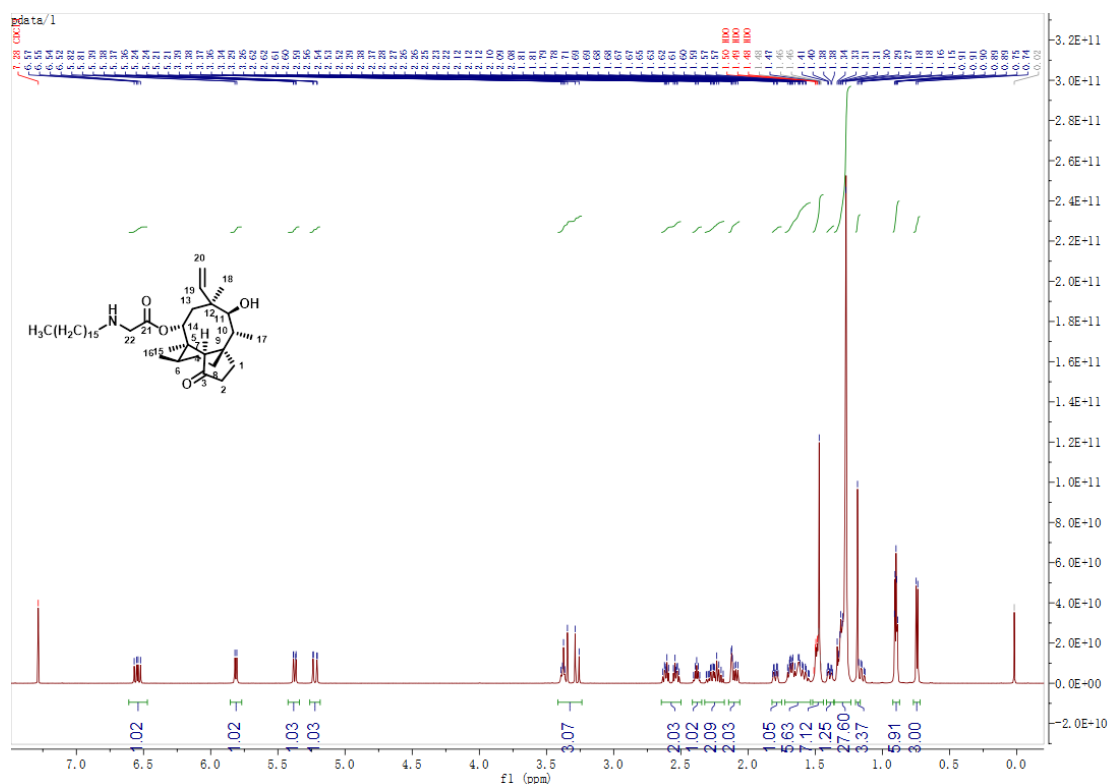

Figure SI 17-1.  $^1\text{H}$ -NMR spectrum (CDCl<sub>3</sub>, 400MHz) of compound 24.

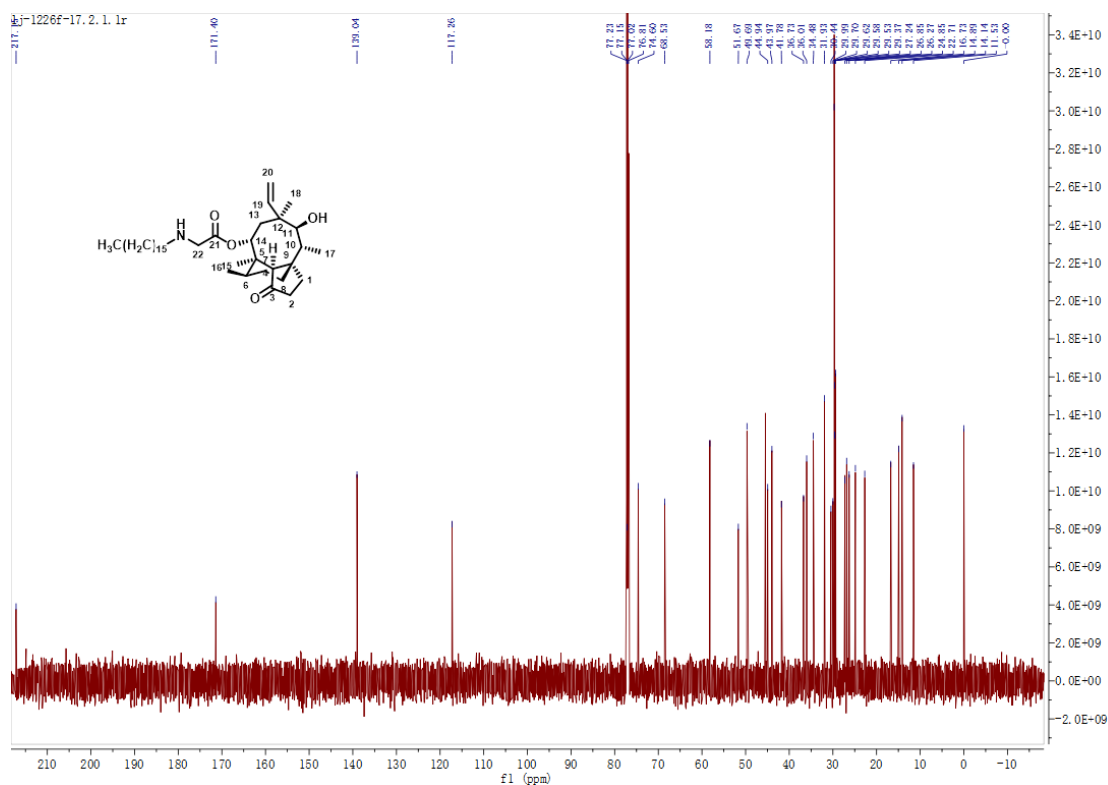

Figure SI 17-2.  $^{13}\text{C}$ -NMR spectrum (CDCl<sub>3</sub>, 101MHz) of compound 24.

Mass spectrum plot showing relative intensity versus  $m/z$ . The x-axis ranges from 360 to 700  $m/z$ , and the y-axis ranges from 0 to 100 relative intensity. The base peak is at  $m/z$  602.5128. Other labeled peaks include 383.1214, 437.1909, 499.4761, 546.4489, 574.4813, 588.4976, 617.5400, and 630.5439.

| Name | RT(min) | Area  | Area(%) | Height |
|------|---------|-------|---------|--------|
| 1    | 2.580   | 887   | 2.60    | 103    |
| 2    | 6.760   | 19    | 0.06    | 4      |
| 3    | 10.509  | 33198 | 97.34   | 1370   |

35

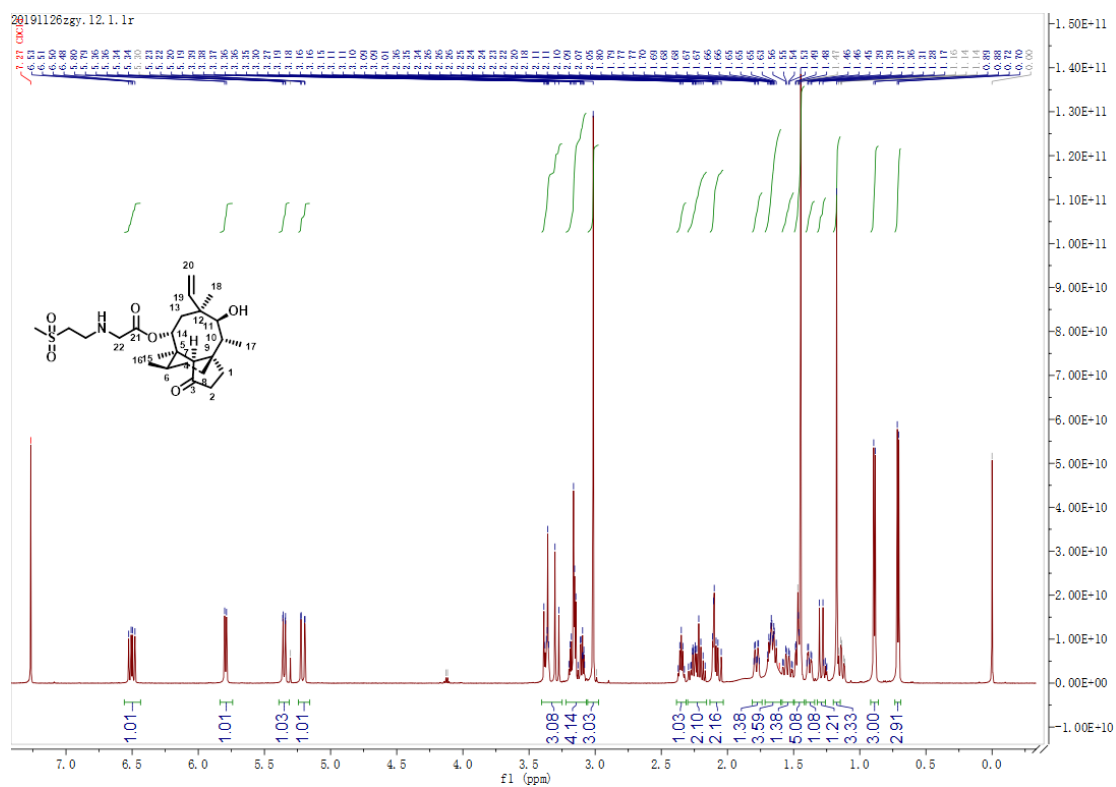

Figure SI 18-1.  $^1\text{H}$ -NMR spectrum ( $\text{CDCl}_3$ , 400MHz) of compound **25**.

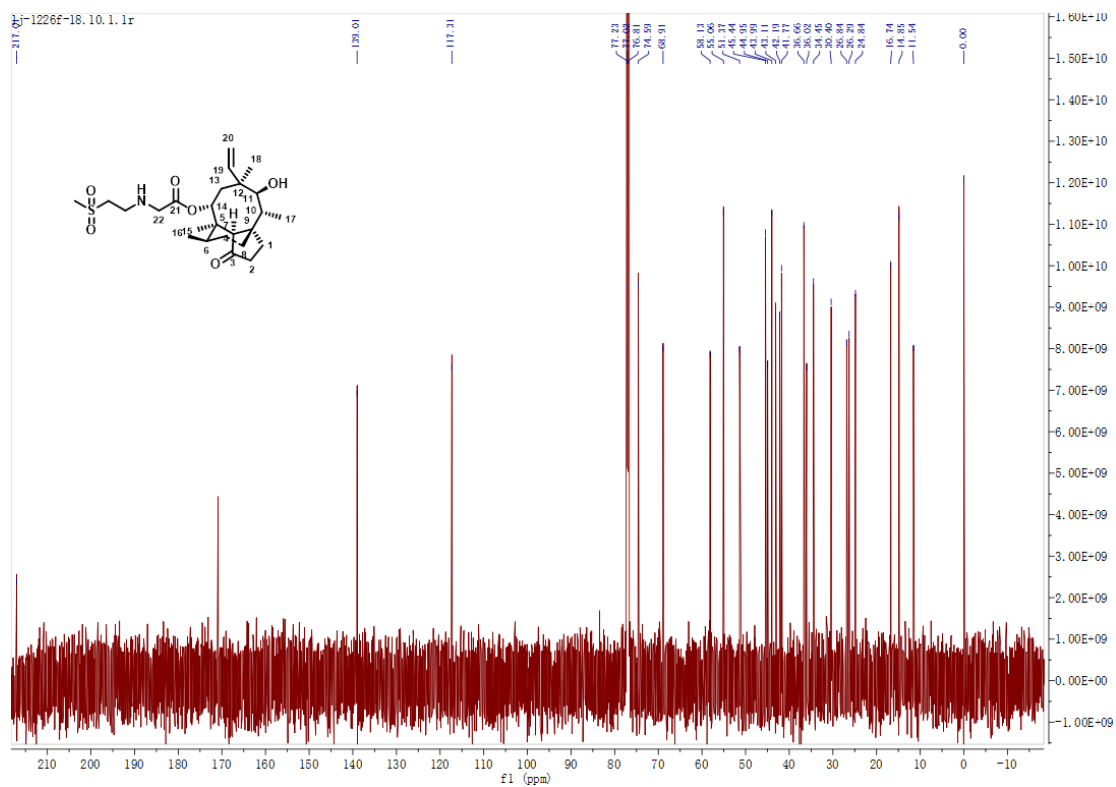

Figure SI 18-2.  $^{13}\text{C}$ -NMR spectrum ( $\text{CDCl}_3$ , 101MHz) of compound **25**.

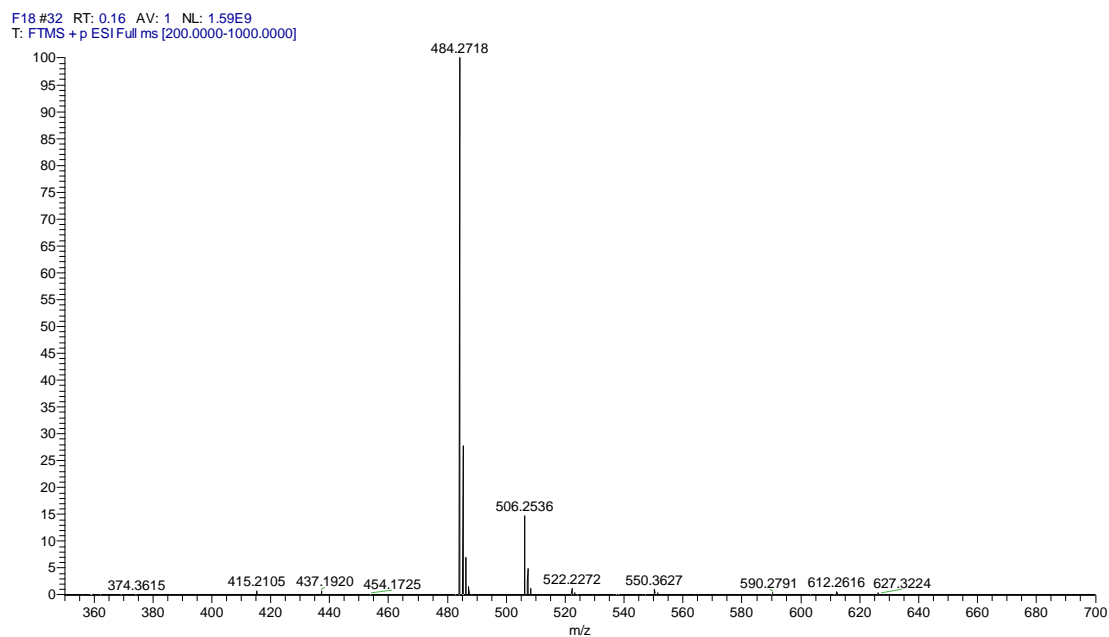

**Figure SI 18-3. HR Mass spectrum (ESI) of compound 25.**

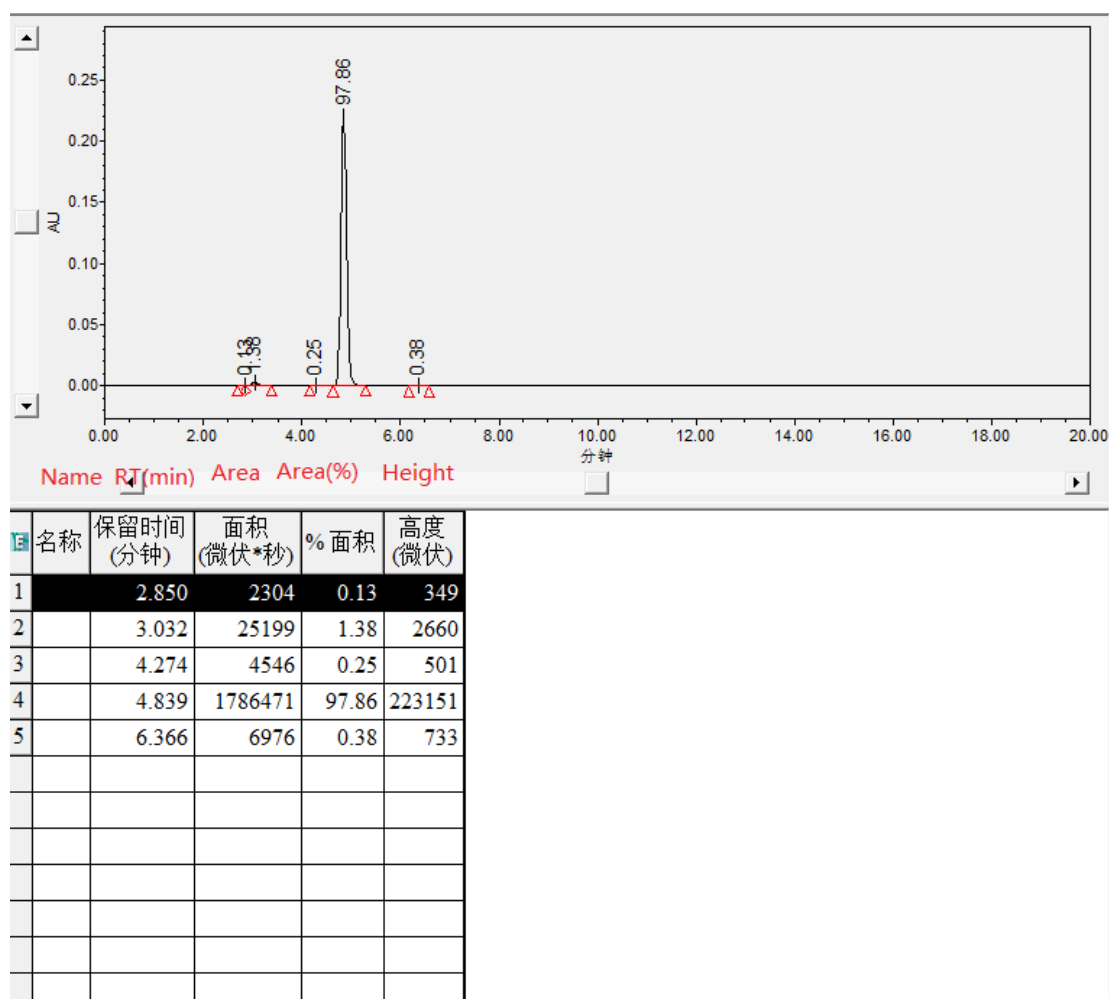

**Figure SI 18-4. HPLC of compound 25.**

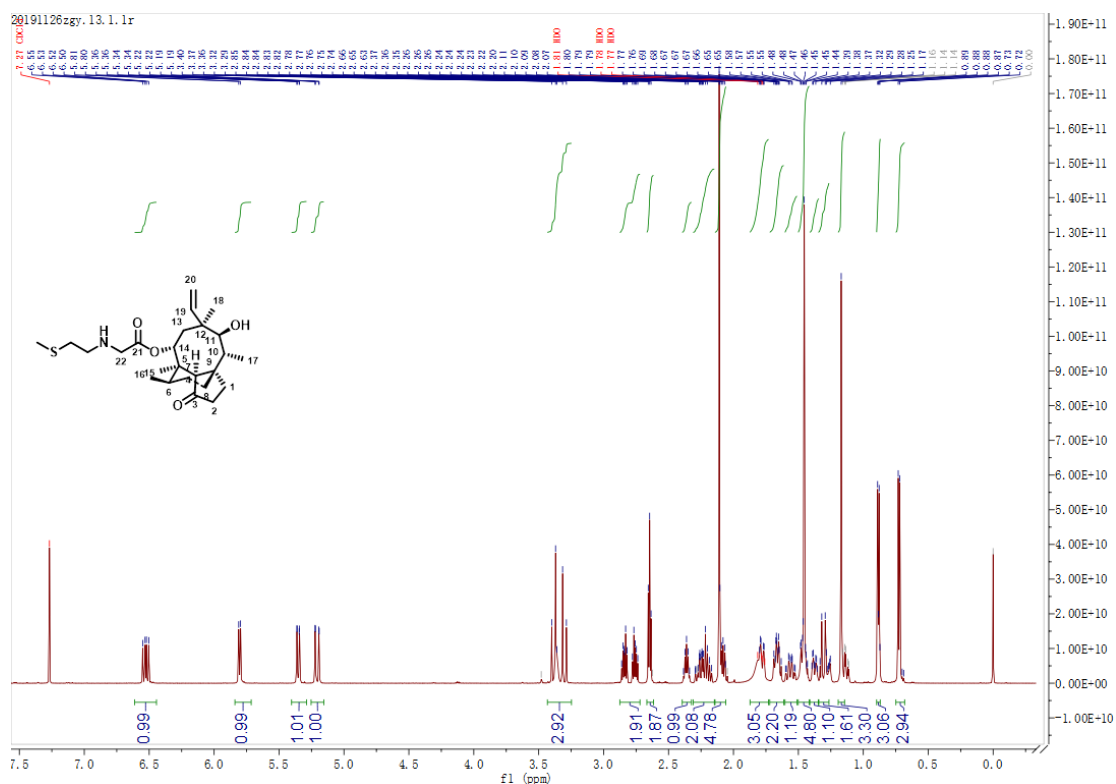

**Figure SI 19-1.**  $^1\text{H}$ -NMR spectrum ( $\text{CDCl}_3$ , 400MHz) of compound 26.

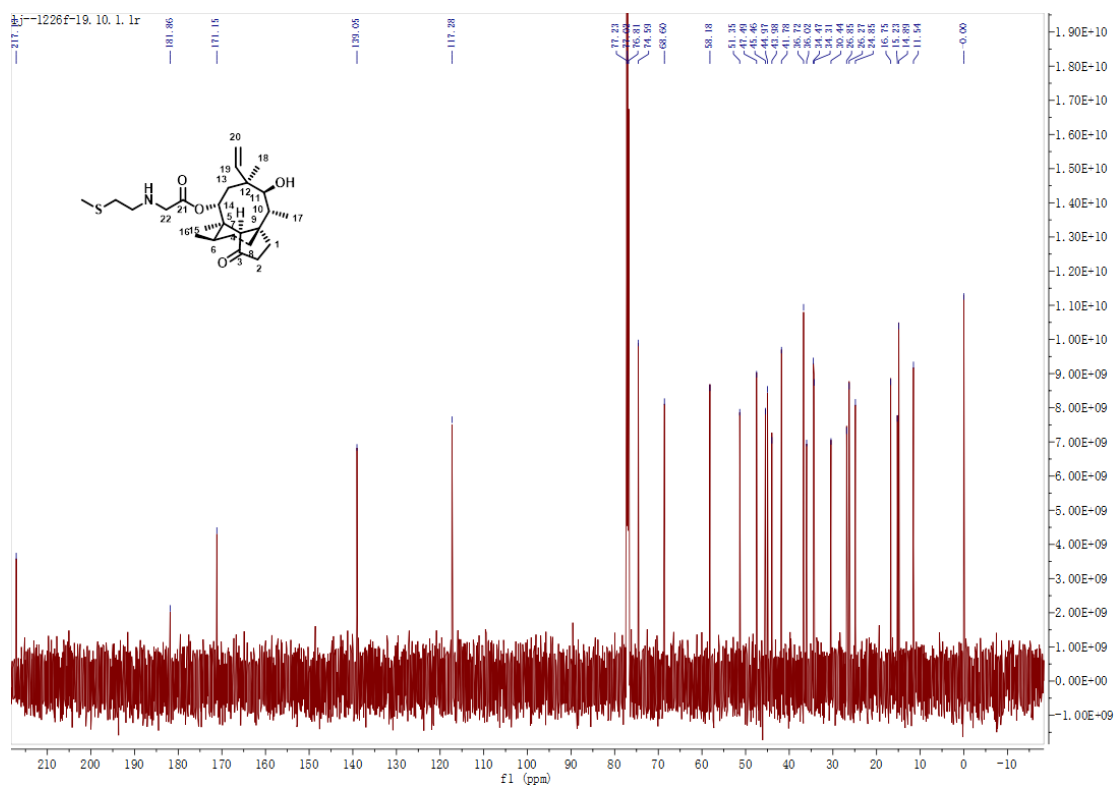

**Figure SI 19-2.**  $^{13}\text{C}$ -NMR spectrum ( $\text{CDCl}_3$ , 101MHz) of compound 26.

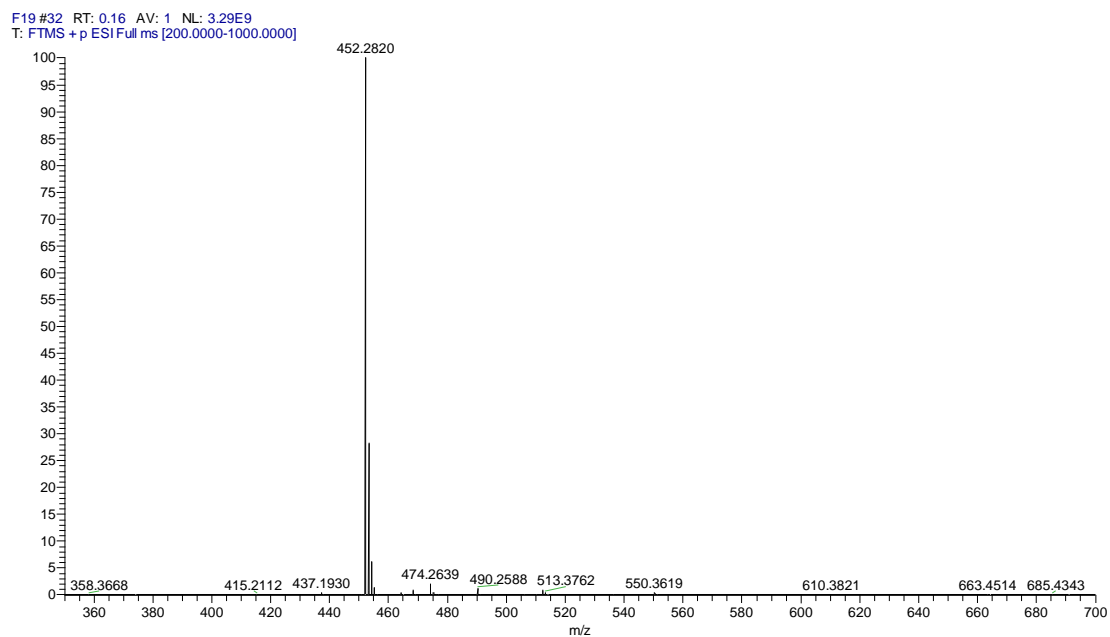

Figure SI 19-3. HR Mass spectrum (ESI) of compound 26.

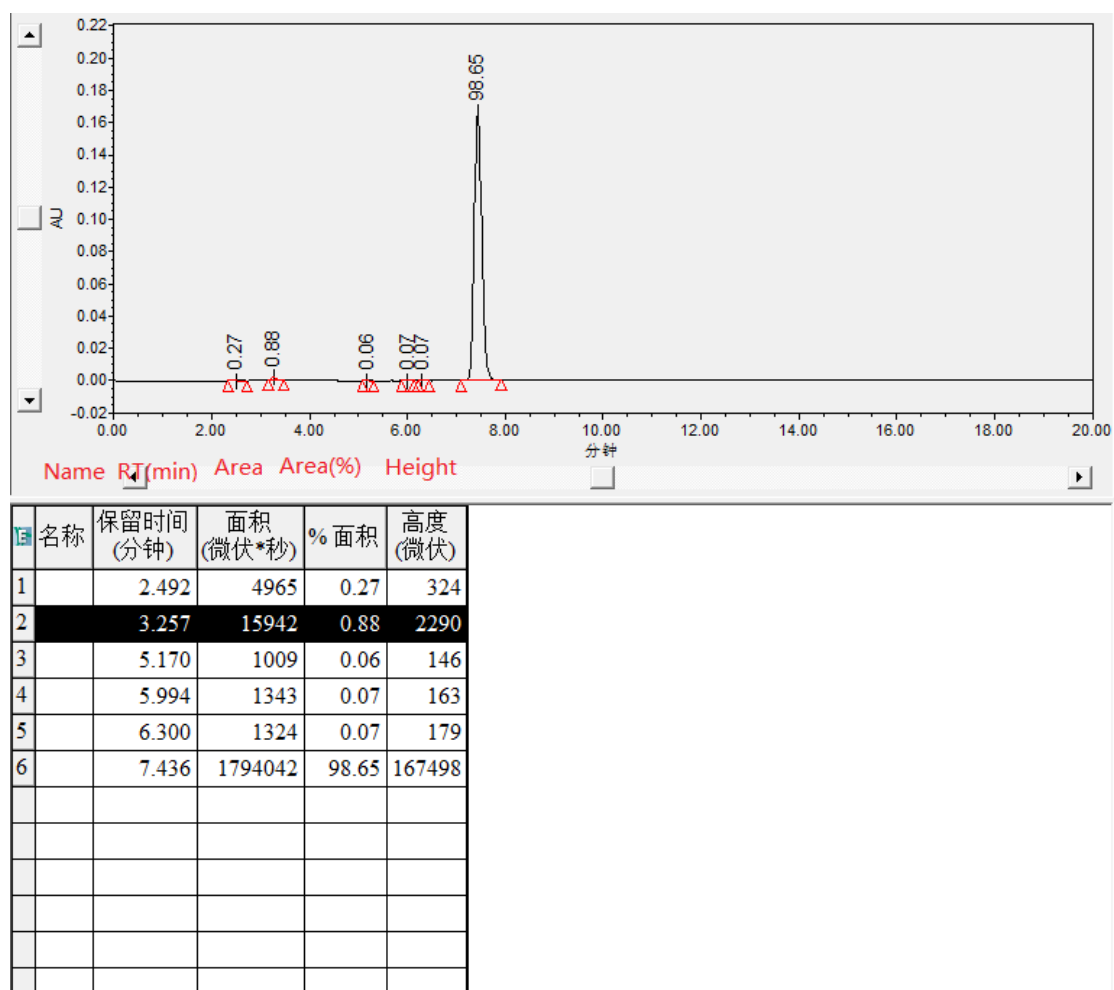

Figure SI 19-4. HPLC of compound 26.

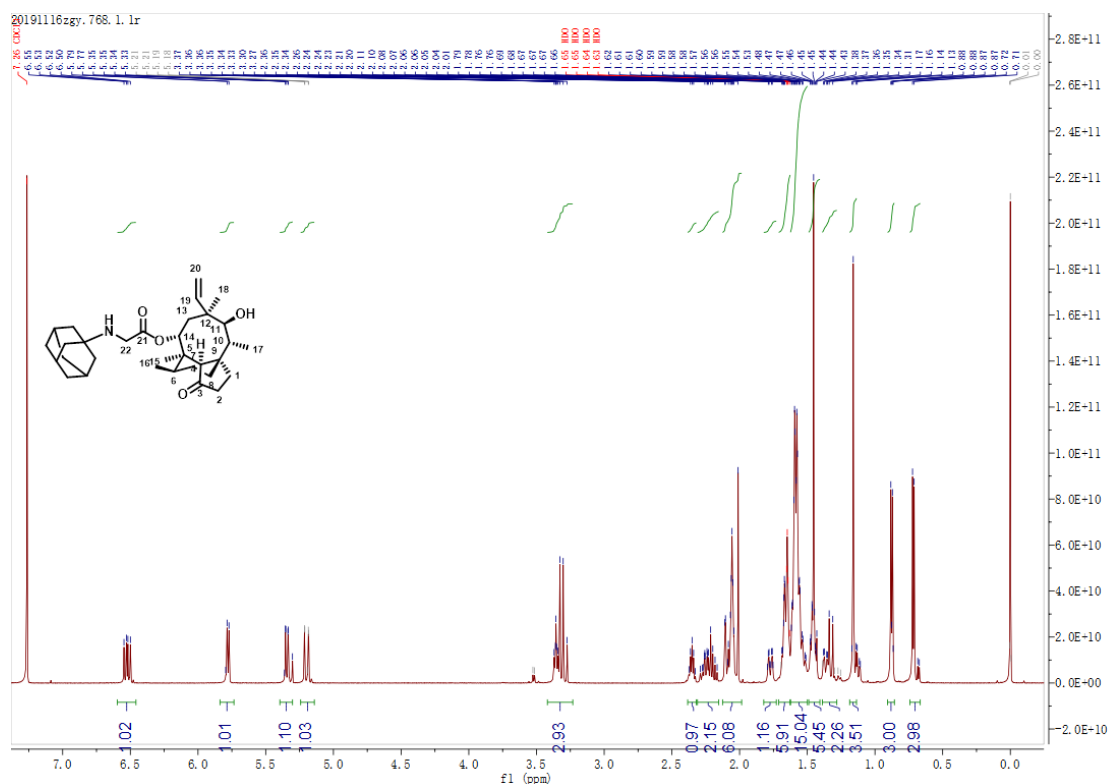

**Figure SI 20-1.**  $^1\text{H}$ -NMR spectrum ( $\text{CDCl}_3$ , 400MHz) of compound 27.

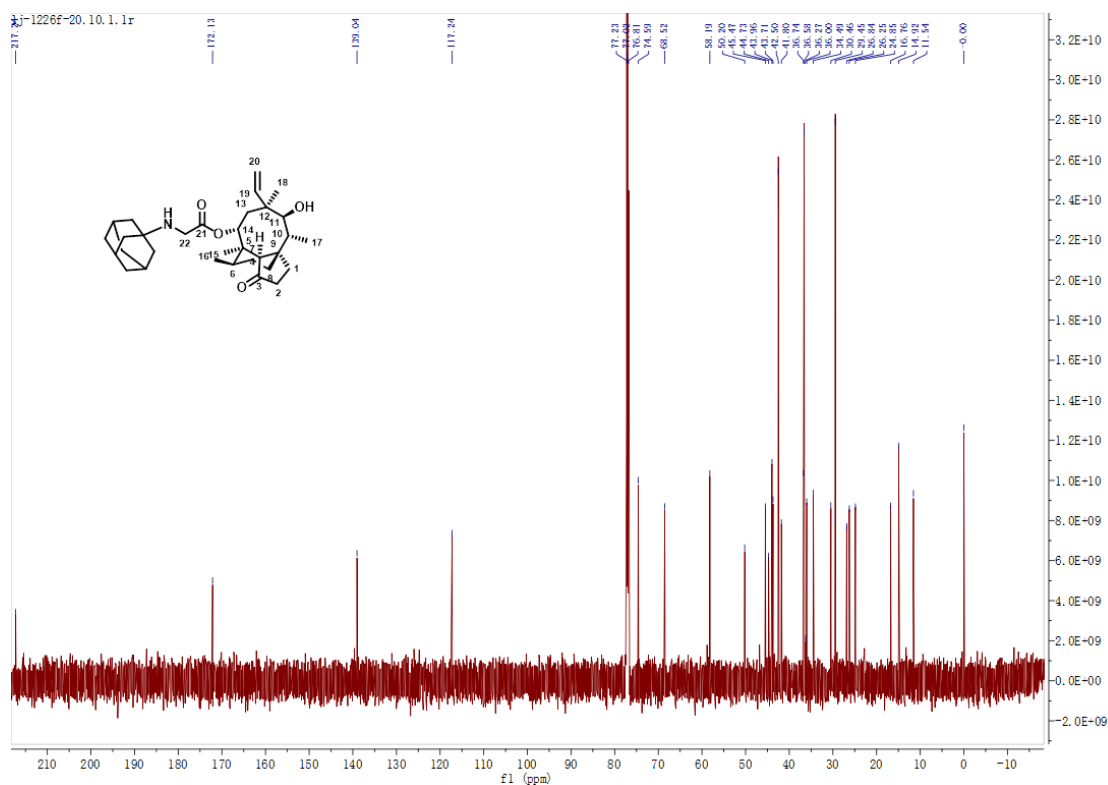

**Figure SI 20-2.**  $^{13}\text{C}$ -NMR spectrum ( $\text{CDCl}_3$ , 101MHz) of compound 27.



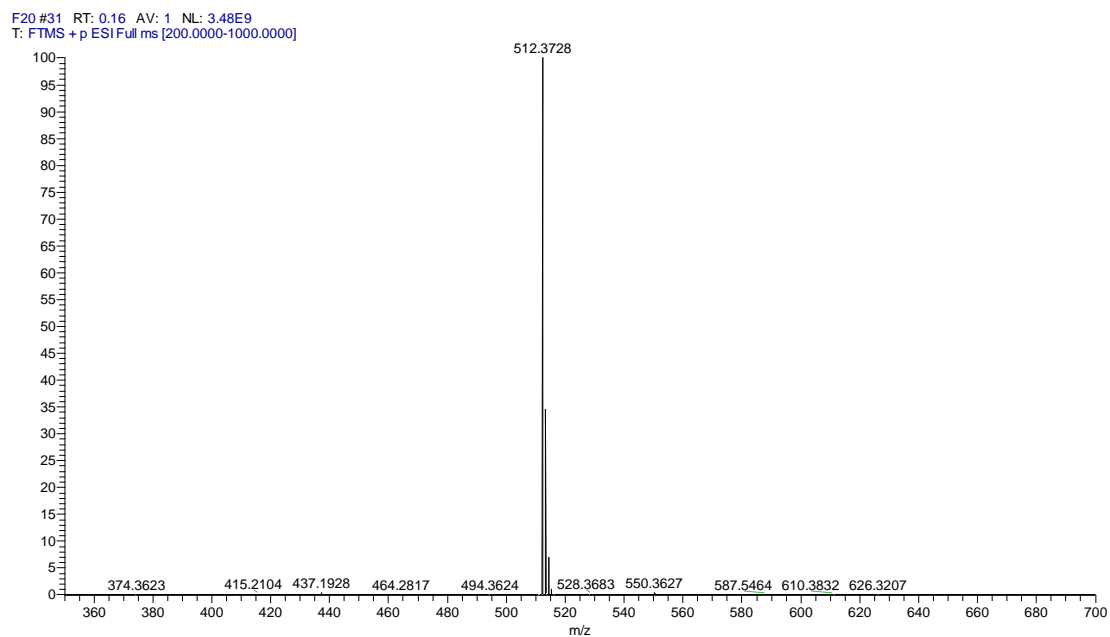

Figure SI 20-3. HR Mass spectrum (ESI) of compound 27.

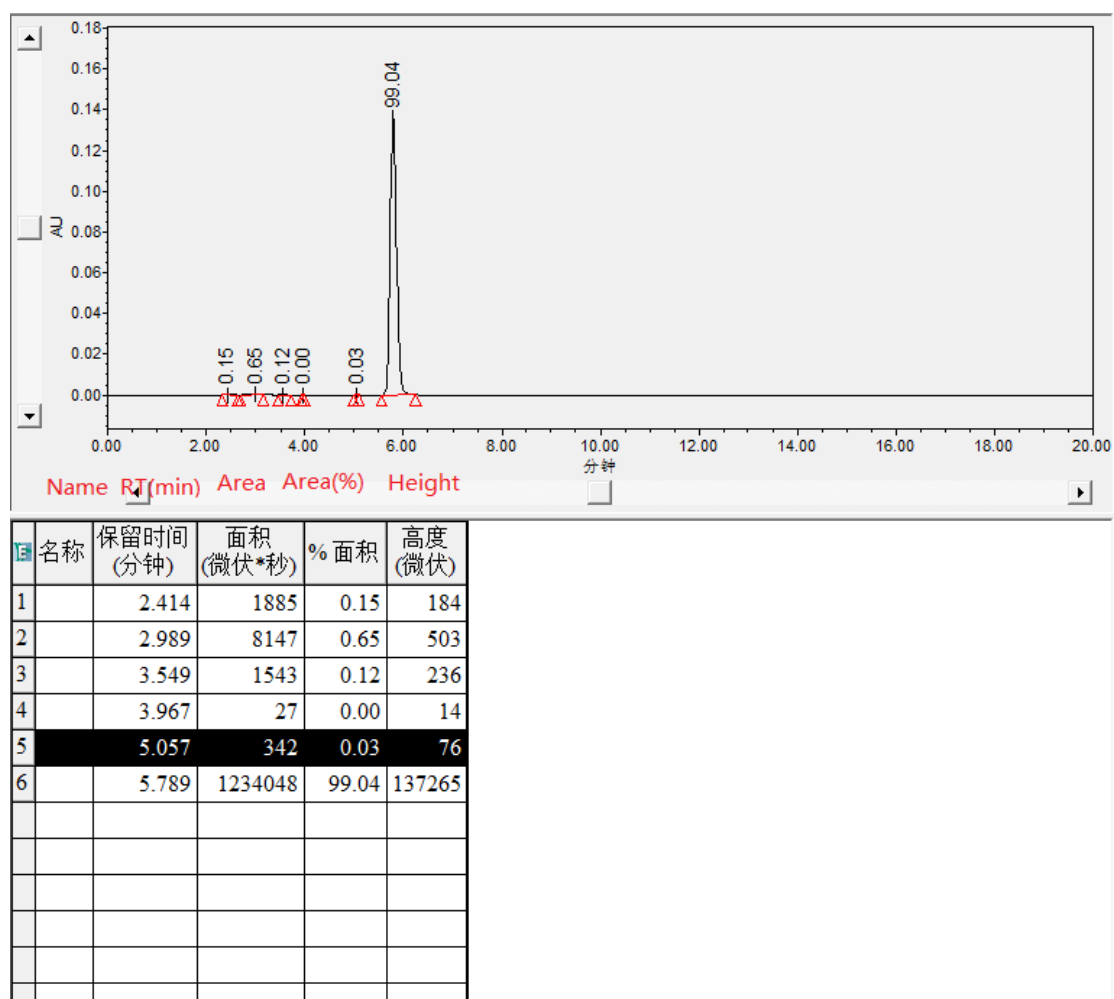

Figure SI 20-4. HPLC of compound 27.

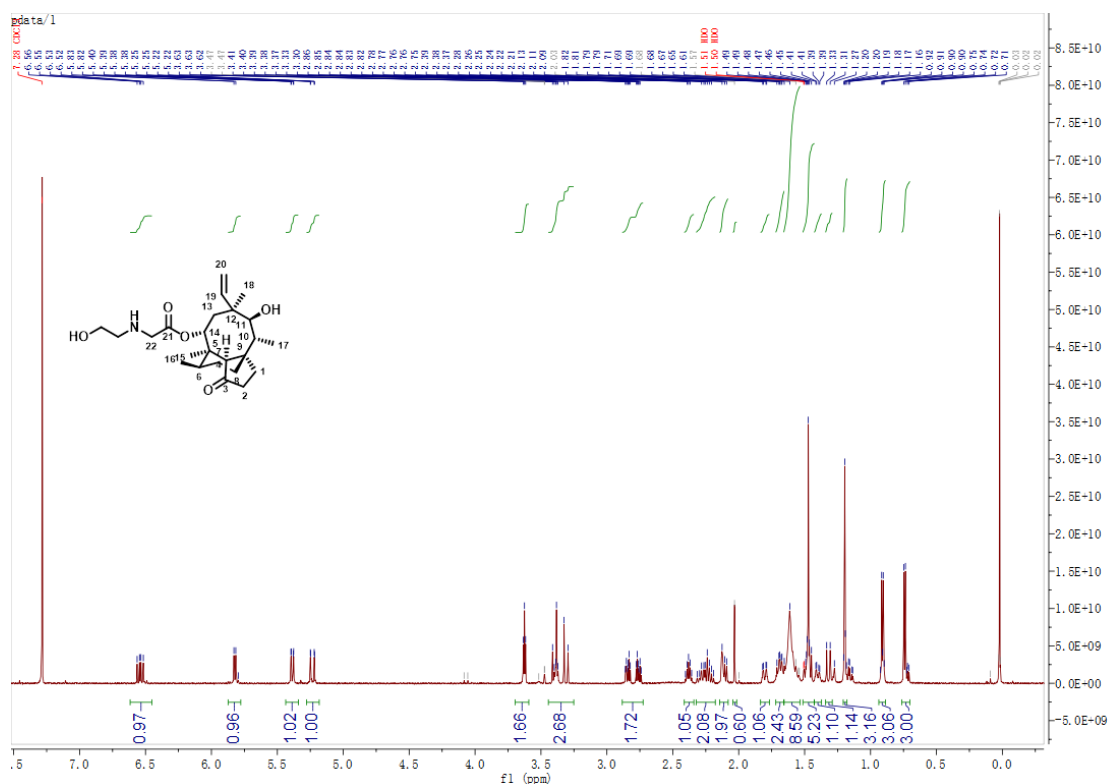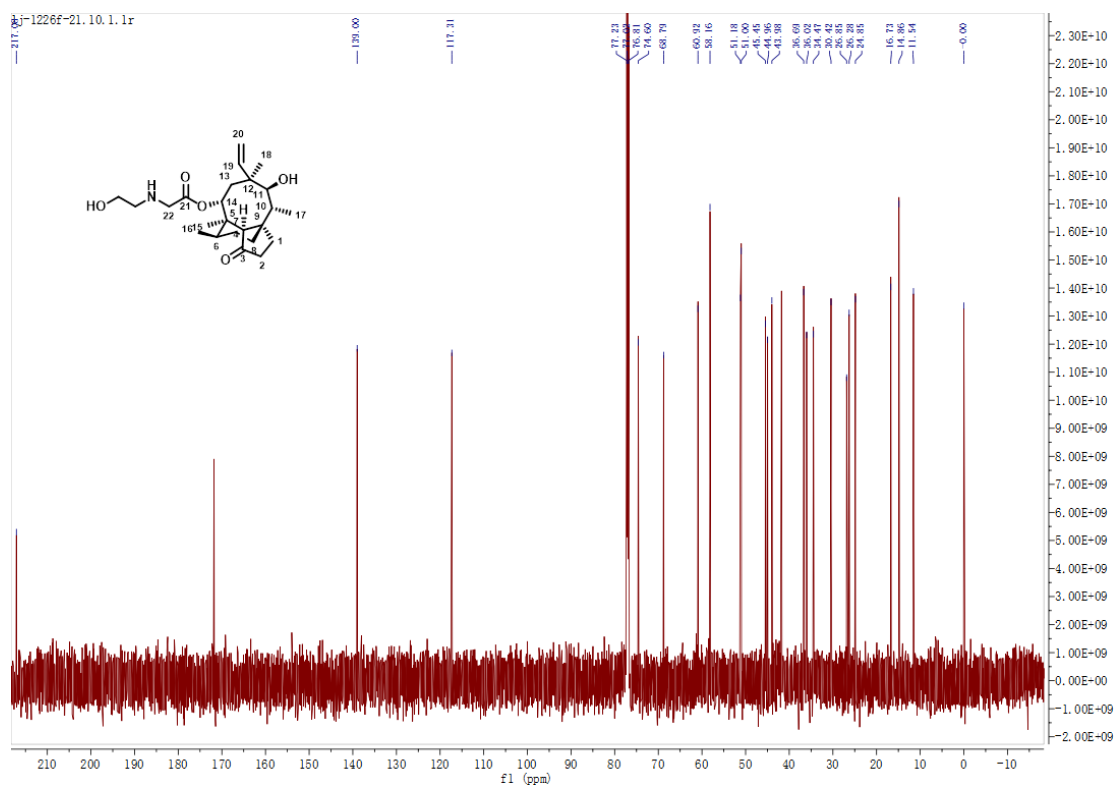

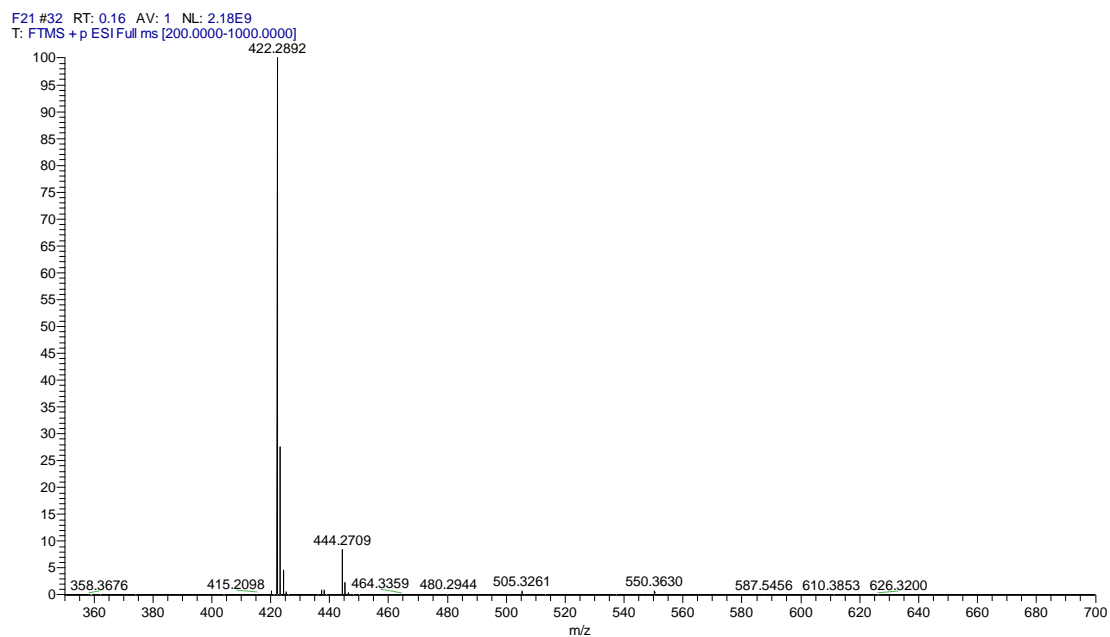

Figure SI 21-3. HR Mass spectrum (ESI) of compound 28.

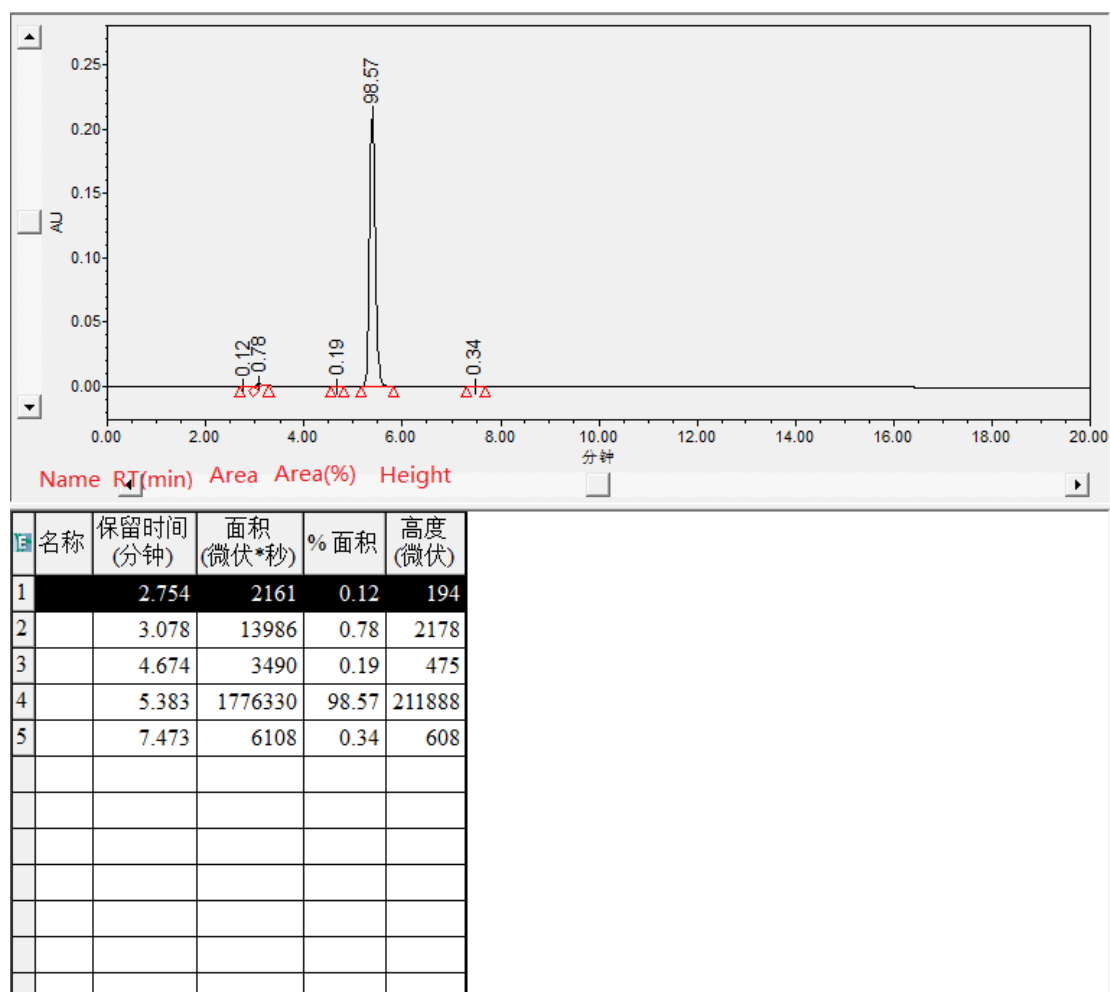

Figure SI 21-4. HPLC of compound 28.

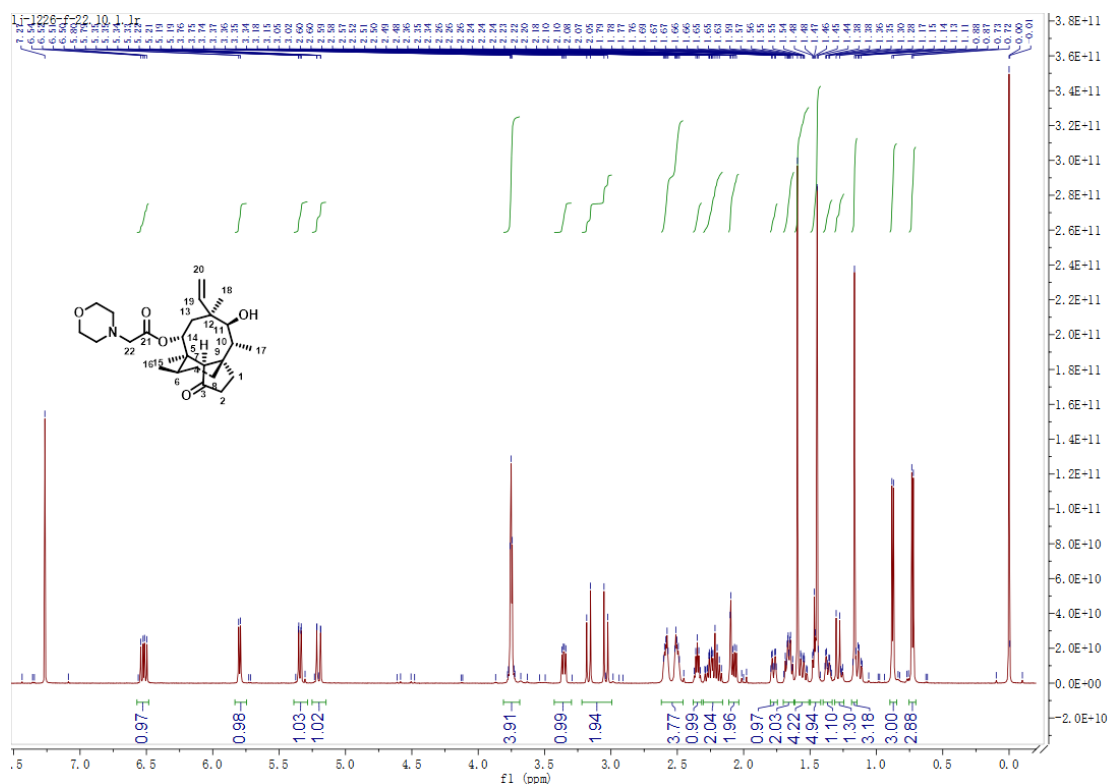

Figure SI 22-1.  $^1\text{H}$ -NMR spectrum (CDCl<sub>3</sub>, 400MHz) of compound **29**.

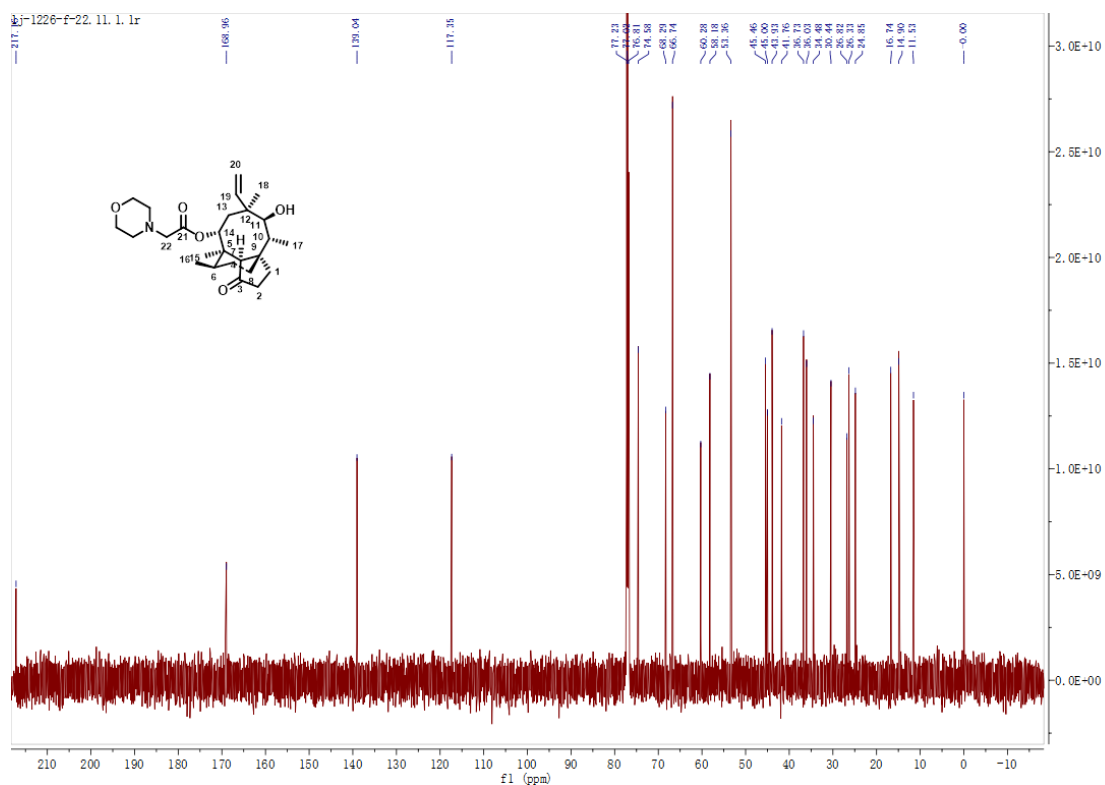

Figure SI 22-2.  $^{13}\text{C}$ -NMR spectrum (CDCl<sub>3</sub>, 101MHz) of compound **29**.

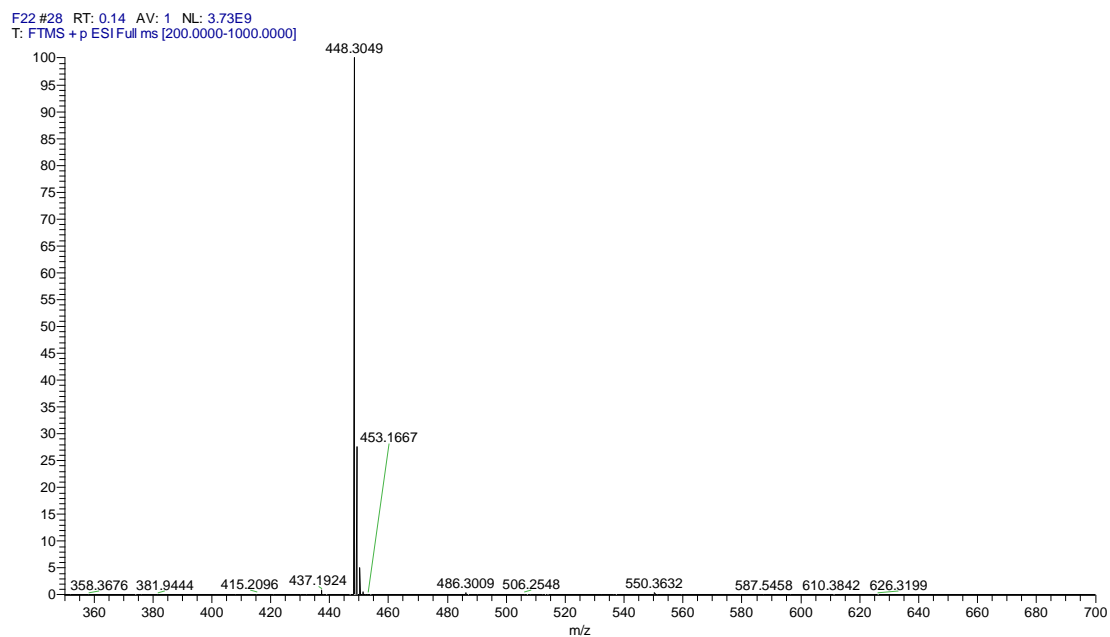

Figure SI 22-3. HR Mass spectrum (ESI) of compound 29.

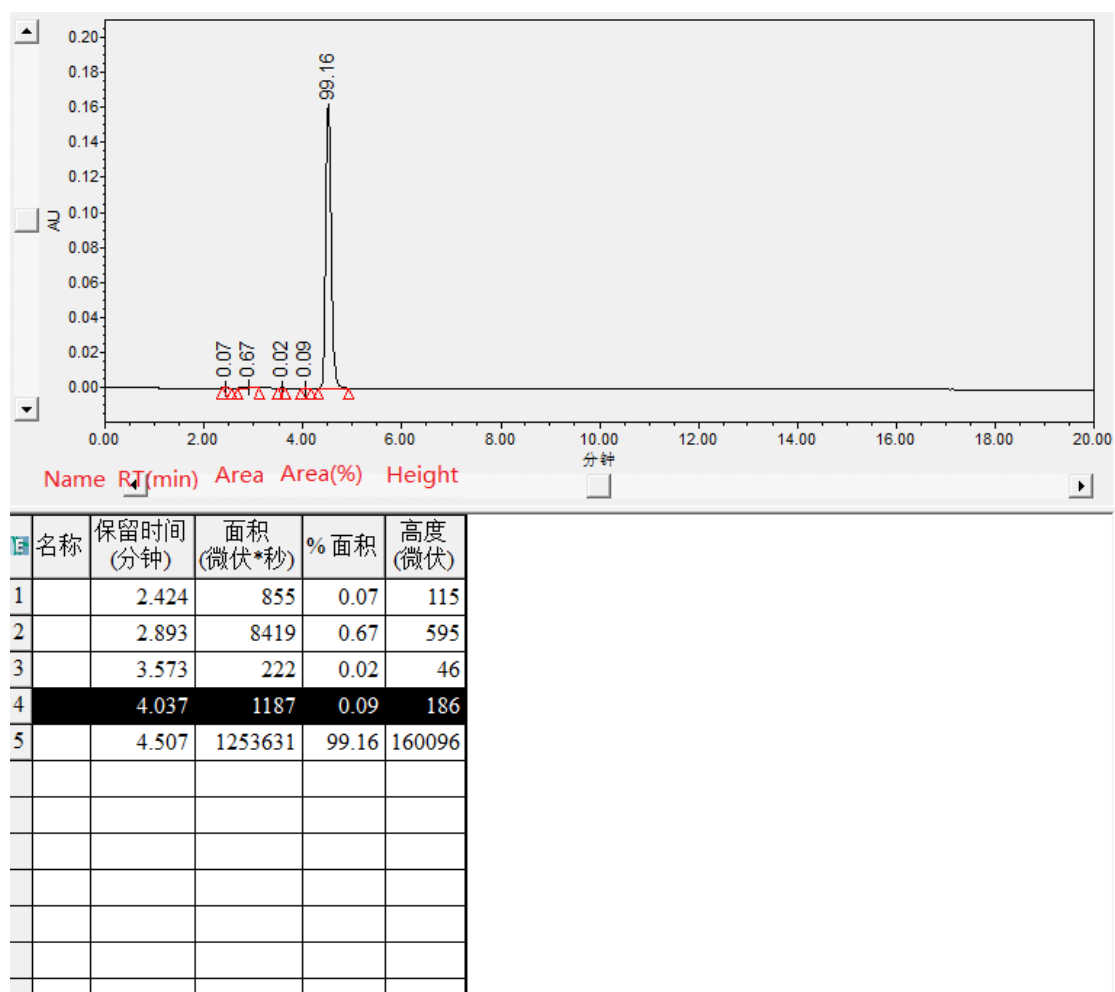

Figure SI 22-4. HPLC of compound 29.

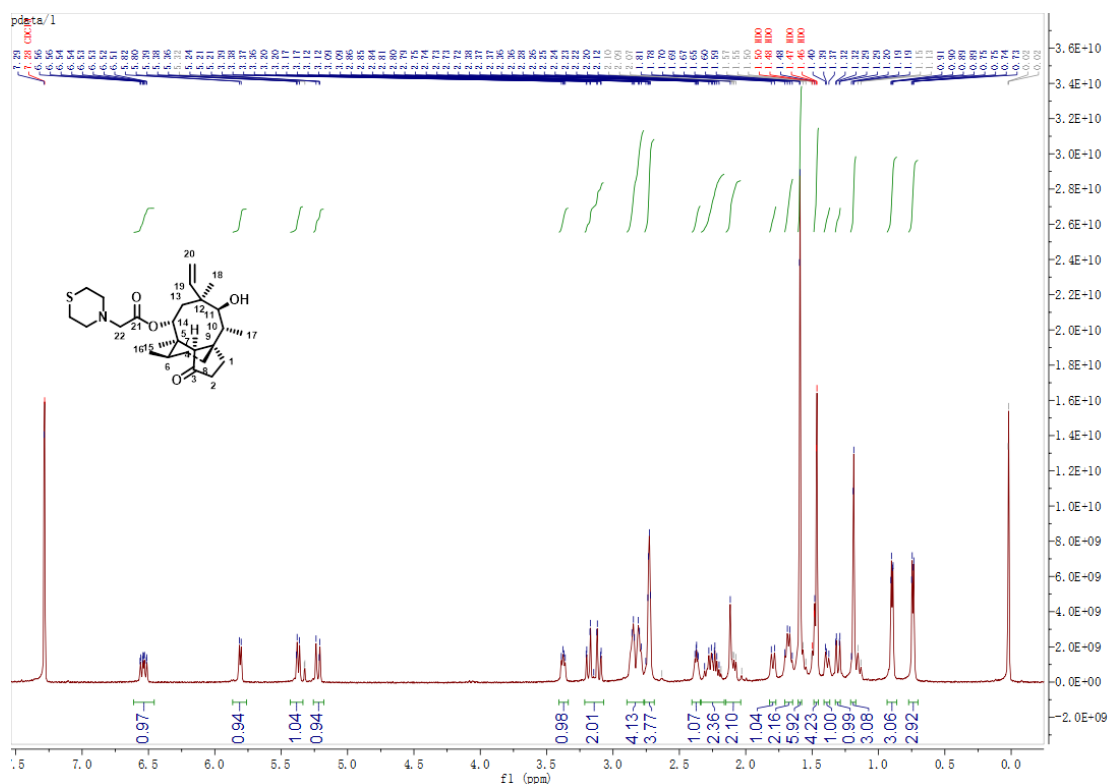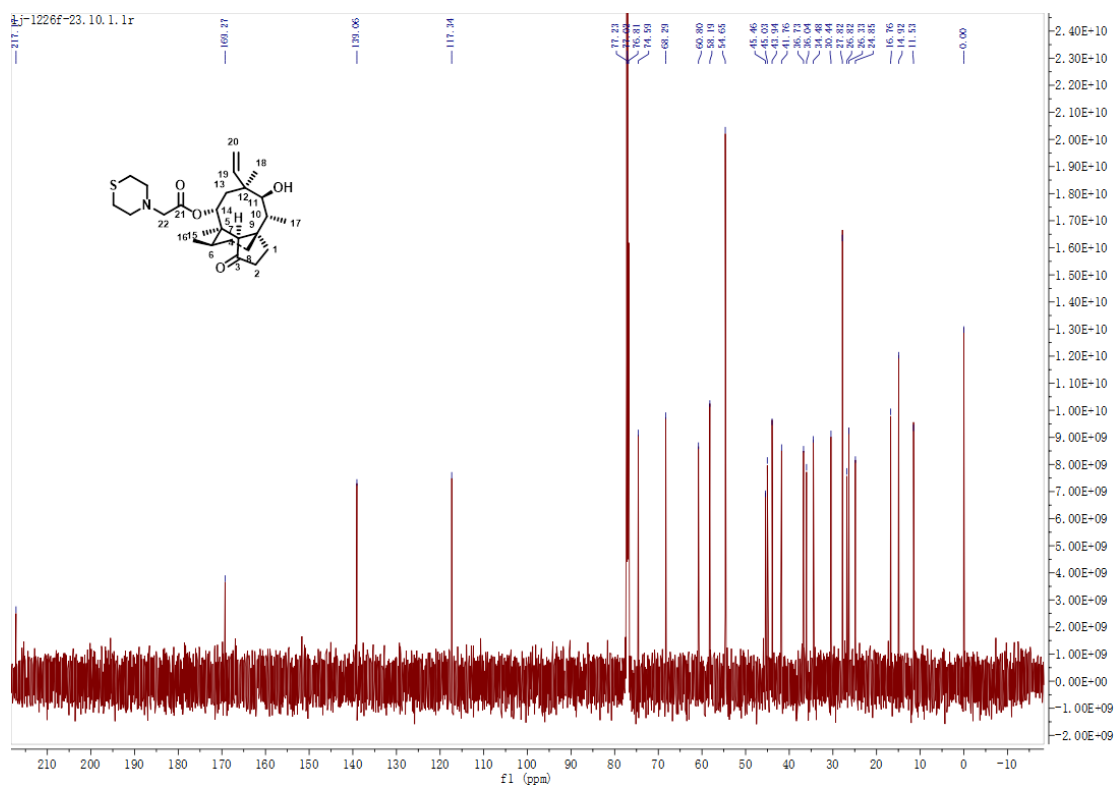

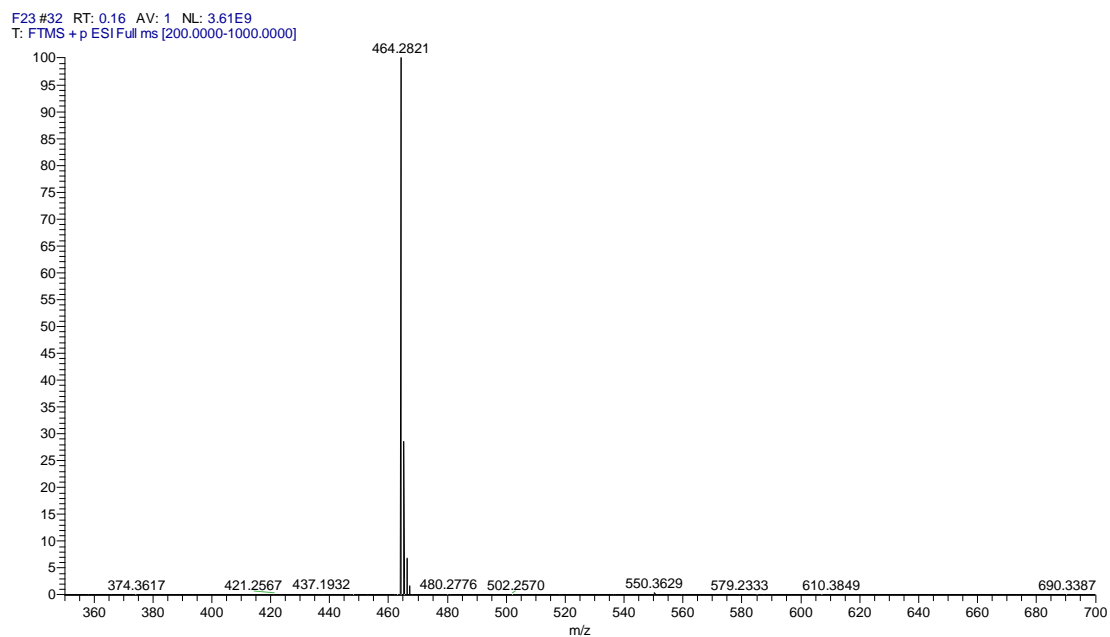

Figure SI 23-3. HR Mass spectrum (ESI) of compound 30.

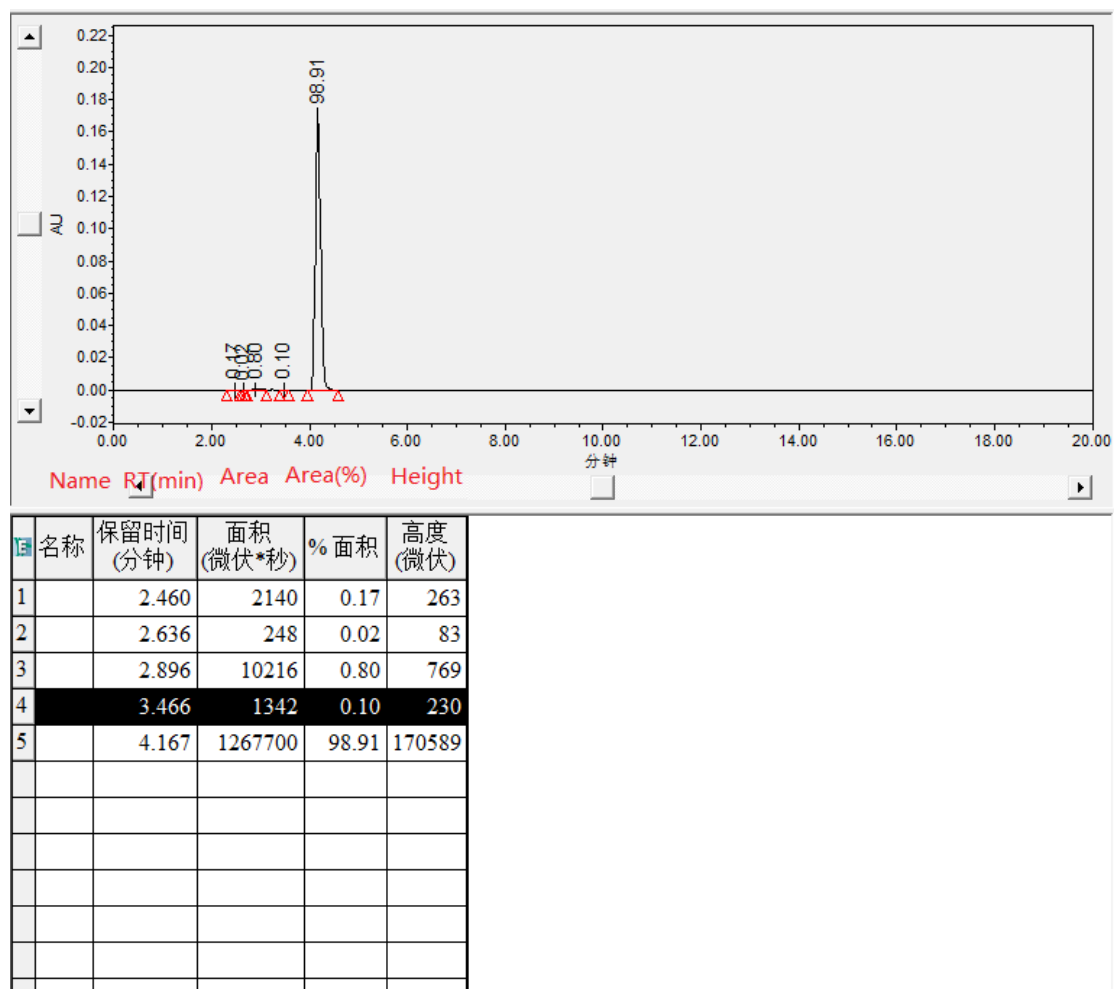

Figure SI 23-4. HPLC of compound 30.

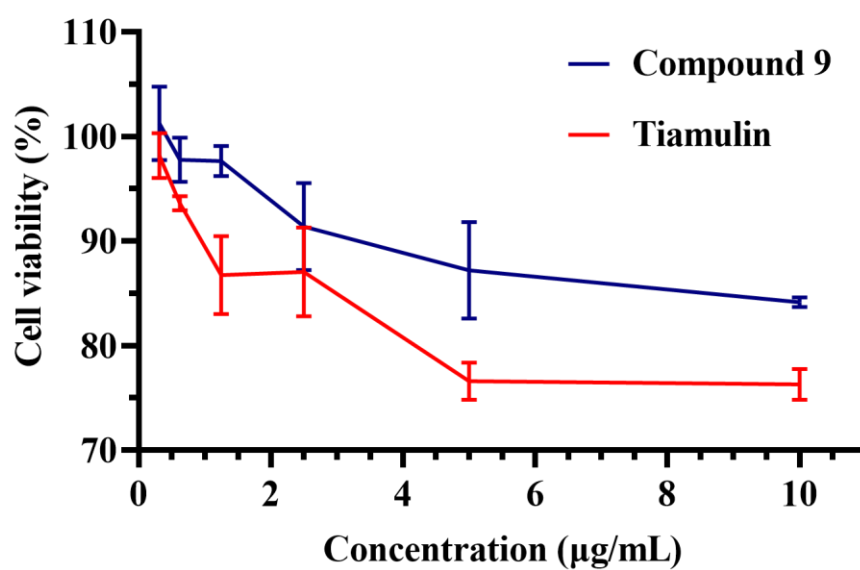

**Figure SI 24.** The cytotoxicity assay of compound **9** and tiamulin to RAW 264.7 cells.
